# Supplementary material for: UV promoted phenanthridine syntheses from oxime carbonate derived iminyl radicals
Source: Royal Society of Chemistry journal article supplement (doi:10.1039/c1cc12720a), 2011-01-01

**Electronic Supplementary Information**

**UV Promoted Phenanthridine Syntheses from Oxime Carbonate Derived  
Iminyl Radicals**

Roy T. McBurney, Alexandra M. Z. Slawin, Laura A. Smart, Yanping Yu  
and John C. Walton

*University of St. Andrews, School of Chemistry, EaStChem, St. Andrews, Fife KY16 9ST, UK*

## Table of Contents

|                                                                                      |     |
|--------------------------------------------------------------------------------------|-----|
| <b>General Experimental Section</b>                                                  | S3  |
| <b>Synthesis and Experimental Section</b>                                            | S5  |
| <b>Scheme S1:</b> Synthesis of 3-methoxyphenanthridine derivatives                   | S5  |
| <b>Scheme S2:</b> Synthesis of 3-methoxyphenanthridine <b>2</b> and nitrile <b>3</b> | S8  |
| <b>Table S1:</b> Solvent screening results for the UV photolysis of <b>1</b>         | S8  |
| <b>Scheme S3:</b> Synthesis of 6-methylphenanthridine derivatives                    | S8  |
| <b>Scheme S4:</b> Synthesis of quinoline derivatives                                 | S20 |
| <b>Scheme S5:</b> Synthesis of isoquinoline derivatives                              | S24 |
| <b>Scheme S6:</b> Synthesis of trispheridine                                         | S28 |
| <b>Figure S1:</b> The X-ray crystal structure of <b>1b</b>                           | S30 |
| <b>Table S2:</b> Crystal data for <b>1b</b>                                          | S30 |
| <b>Figure S2:</b> The X-ray crystal structure of <b>5d</b>                           | S31 |
| <b>Table S3:</b> Crystal data for <b>5d</b>                                          | S31 |
| <b>Figure S3:</b> The X-ray crystal structure of <b>4f</b>                           | S32 |
| <b>Table S4:</b> Crystal data for <b>4f</b>                                          | S32 |
| <b>Figure S4:</b> The X-ray crystal structure of <b>10</b>                           | S32 |
| <b>Table S5:</b> Crystal data for <b>10</b>                                          | S33 |
| <b>References</b>                                                                    | S34 |
| <b><sup>1</sup>H and <sup>13</sup>C NMR spectra of novel compounds</b>               | S35 |

## General Experimental Section

All reagents and solvents were purchased from either Sigma Aldrich or Alfa Aesar and used without further purification. Toluene was distilled over sodium and dichloromethane distilled over calcium hydride. 4'-Methoxybiphenyl-2-carbaldehyde,<sup>1</sup> 2-acetyl-biphenyl oxime,<sup>2</sup> 2-acetyl-3-bromofuran<sup>3</sup> and 6-phenylbenzo[*d*][1,3]dioxole-5-carbaldehyde oxime<sup>2</sup> were prepared according to the literature procedures. Column chromatography was carried out using Silica 60A (particle size 40-63  $\mu\text{m}$ , Silicycle, Canada) as the stationary phase, and TLC was performed on precoated silica gel plates (0.20 mm thick, Sil G UV<sub>254</sub>, Macherey-Nagel, Germany) and observed under UV light. <sup>1</sup>H and <sup>13</sup>C NMR spectra were recorded on Bruker AV II 400 and Bruker AV 300 instruments. Chemical shifts are reported in parts per million (ppm) from low to high frequency and referenced to the residual solvent resonance. Coupling constants (*J*) are reported in hertz (Hz). Standard abbreviations indicating multiplicity were used as follows: s = singlet, d = doublet, t = triplet, dd = double doublet, q = quartet, m = multiplet, b = broad. Melting points (M.p.) were determined using a Sanyo Gallenkamp apparatus and are reported uncorrected. Mass spectrometry was carried out by the services at the University of St Andrews and the EPSRC National Mass Spectrometry Service Centre, Swansea, UK.

## EPR Spectroscopy

EPR spectra were obtained with a Bruker EMX 10/12 spectrometer fitted with a rectangular ER4122 SP resonant cavity and operating at 9.5 GHz with 100 kHz modulation. Stock solutions of each oxime carbonate (2 to 15 mg) and MAP (1 equiv wt/wt) in *tert*-butylbenzene or benzene (0.5 mL) were prepared and sonicated if necessary. An aliquot (0.2 mL), to which any additional reactant had been added, was placed in a 4 mm o.d. quartz tube, de-aerated by bubbling nitrogen for 15 min, and photolysed in the resonant cavity by unfiltered light from a 500 W super pressure mercury arc lamp. The majority of EPR spectra

were recorded with 2.0 mW power, 0.8 G<sub>pp</sub> modulation intensity and gain of *ca.* 10<sup>6</sup>. In all cases where spectra were obtained, hfs were assigned with the aid of computer simulations using the Bruker SimFonia and NIEHS Winsim2002 software packages. EPR signals were digitally filtered and double integrated using the Bruker WinEPR software.

### **Suzuki Coupling General Procedure**

To a stirred solution of aryl bromide (1.0 equiv.) and aryl boronic acid (1.2 equiv.) in a toluene/ethanol (4:1, 0.1 M) mixture was added potassium carbonate (3.0 equiv.) and tetrakis(triphenylphosphine) palladium(II) (0.1 equiv.). The resulting suspension was heated at reflux under an atmosphere of Ar for 18 h. The solvent was removed under reduced pressure and the crude residue was redissolved in H<sub>2</sub>O (100 mL) and extracted with EtOAc (3 × 100 mL). The combined organic layers were washed with brine (100 mL) and dried over MgSO<sub>4</sub>. The filtrate was concentrated under reduced pressure and purified by column chromatography (CH<sub>2</sub>Cl<sub>2</sub> as eluent).

### **Oxime Formation General Procedure**

To a stirred solution of carbonyl (1.0 equiv.) in EtOH (0.1 M) was added hydroxylamine hydrochloride (2.0 equiv.) and sodium acetate (2.0 equiv.). The resulting suspension was heated at reflux for 18 h. The solvent was removed under reduced pressure and the crude residue redissolved in H<sub>2</sub>O (100 mL) and extracted with CH<sub>2</sub>Cl<sub>2</sub> (3 × 100 mL). The combined organic layers were dried over MgSO<sub>4</sub>, concentrated under reduced pressure and used without further purification.

### **Oxime Carbonate Formation General Procedure**

To a stirred solution of oxime (1.0 equiv.) in CH<sub>2</sub>Cl<sub>2</sub> (0.1 M) was added ethyl chloroformate or phenyl chloroformate (1.0 equiv.) and pyridine (1.0 equiv.). The yellow solution was stirred at rt for 18 h. The reaction mixture was diluted with CH<sub>2</sub>Cl<sub>2</sub> (100 mL) and washed

with 1 M HCl, saturated aqueous NaHCO<sub>3</sub> (100 mL) and brine (100 mL). The organic layer was dried over MgSO<sub>4</sub>, concentrated under reduced pressure and purified by column chromatography (CH<sub>2</sub>Cl<sub>2</sub> as eluent).

### UV Cyclisation of Oxime Carbonate Derivatives General Procedure

A quartz tube was charged with oxime carbonate (1.0 equiv.), 4-methoxyacetophenone (MAP) (1 equiv. *wt/wt*) and benzotrifluoride (3 mL). The reaction mixture was degassed by bubbling Ar through the solution for 15 min. The solution was irradiated with UV light (400 W medium pressure Hg lamp) for 3 h. The solvent was removed under reduced pressure and the crude residue purified by column chromatography (CH<sub>2</sub>Cl<sub>2</sub>:EtOAc 9:1 as eluent).

### Synthesis and Experimental Section

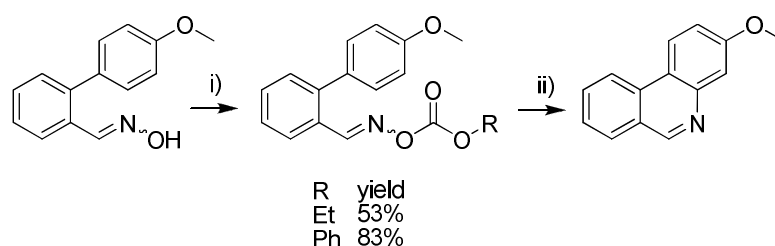

**Scheme S1:** Synthesis of 3-methoxyphenanthridine derivatives. Reagents and conditions: i) NH<sub>2</sub>OH.HCl, NaOAc, EtOH, reflux, 18 h, 96%; ii) EtOCO<sub>2</sub>Cl or PhOCO<sub>2</sub>Cl, pyridine, CH<sub>2</sub>Cl<sub>2</sub>, rt, 18 h; iv) MAP, UV irradiation, 3 h.

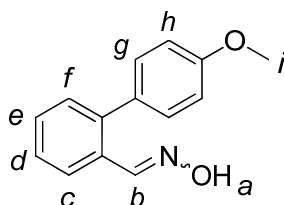

### 4'-Methoxybiphenyl-2-carbaldehyde oxime

Prepared from 4'-methoxybiphenyl-2-carbaldehyde<sup>1</sup> (0.999 g, 4.71 mmol), hydroxylamine hydrochloride (0.655 g, 9.42 mmol) and sodium acetate (0.772 g, 9.47 mmol). Colourless oil (1.028 g, yield = 96%). <sup>1</sup>H NMR (400 MHz, CDCl<sub>3</sub>, 294 K): δ = 3.86 (s, 3H, H<sub>i</sub>), 6.98 (d, *J* =

8.8 Hz, 2H,  $H_h$ ), 7.25 (d,  $J = 8.8$  Hz, 2H,  $H_g$ ), 7.32-7.38 (m, 2H,  $H_{d,f}$ ), 7.43 (dd,  $J = 1.5$  Hz, 7.5 Hz, 1H,  $H_e$ ), 7.52 (br, 1H,  $H_a$ ), 7.86 (d,  $J = 7.5$  Hz, 1H,  $H_c$ ), 8.12 (s, 1H,  $H_b$ );  $^{13}\text{C}$  NMR (100 MHz,  $\text{CDCl}_3$ , 295 K):  $\delta = 55.4, 113.8, 126.1, 127.3, 129.6, 129.7, 130.3, 130.9, 131.8, 141.9, 150.0, 159.2$ ; LR-ESIMS:  $m/z = 250$   $[\text{MNa}]^+$ ; HR-ESIMS:  $m/z = 250.0848$  (calcd. for  $\text{C}_{14}\text{H}_{13}\text{NO}_2\text{Na}$ , 250.0828).

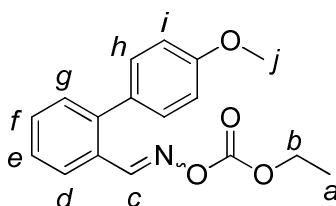

#### 4'-Methoxybiphenyl-2-carbaldehyde *O*-ethoxycarbonyl oxime – 1a

Prepared from 4'-methoxybiphenyl-2-carbaldehyde oxime (0.470 g, 2.07 mmol), ethyl chloroformate (0.22 mL, 2.36 mmol) and pyridine (0.19 mL, 2.36 mmol). Tan coloured solid (0.372 g, 53%). M.p. = 67-69 °C;  $^1\text{H}$  NMR (400 MHz,  $\text{CDCl}_3$ , 294 K):  $\delta = 1.36$  (t,  $J = 7.1$  Hz, 3H,  $H_a$ ), 3.86 (s, 3H,  $H_j$ ), 4.34 (d,  $J = 7.1$  Hz, 2H,  $H_b$ ), 6.97 (d,  $J = 8.8$  Hz, 2H,  $H_i$ ), 7.22 (d,  $J = 8.8$  Hz, 2H,  $H_h$ ), 7.36-7.41 (m, 2H,  $H_{e,g}$ ), 7.50 (dd,  $J = 1.4$  Hz, 7.5 Hz, 1H,  $H_f$ ), 8.10 (dd,  $J = 1.2$  Hz, 7.8 Hz, 1H,  $H_d$ ), 8.34 (s, 1H,  $H_c$ );  $^{13}\text{C}$  NMR (100 MHz,  $\text{CDCl}_3$ , 294 K):  $\delta = 14.3, 55.4, 64.8, 114.0, 127.4, 127.4, 127.5, 130.3, 130.9, 131.2, 131.3, 143.2, 153.8, 155.4, 159.5$ ; LR-ESIMS:  $m/z = 322$   $[\text{MNa}]^+$ ; HR-ESIMS:  $m/z = 322.1055$  (calcd. for  $\text{C}_{17}\text{H}_{17}\text{NO}_4\text{Na}$ , 322.1055).

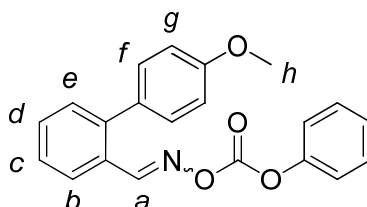

#### 4'-Methoxybiphenyl-2-carbaldehyde *O*-phenoxycarbonyl oxime – 1b

Prepared from 4'-methoxybiphenyl-2-carbaldehyde oxime (0.470 g, 2.07 mmol), phenyl chloroformate (0.26 mL, 2.07 mmol) and pyridine (0.17 mL, 2.07 mmol). Tan coloured solid

(0.598 g, 83%). M.p. = 105-107 °C;  $^1\text{H}$  NMR (400 MHz,  $\text{CDCl}_3$ , 295 K):  $\delta$  = 3.88 (s, 3H,  $\text{H}_h$ ), 7.01 (d,  $J$  = 8.8 Hz, 2H,  $\text{H}_g$ ), 7.26 (m, 5H,  $\text{H}_{f,\text{ArH}}$ ), 7.38-7.44 (m, 4H,  $\text{H}_{c,e,\text{ArH}}$ ), 7.53 (dd,  $J$  = 1.4 Hz, 7.5 Hz, 1H,  $\text{H}_d$ ), 8.13 (dd,  $J$  = 1.2 Hz, 8.8 Hz, 1H,  $\text{H}_b$ ), 8.44 (s, 1H,  $\text{H}_a$ );  $^{13}\text{C}$  NMR (100 MHz,  $\text{CDCl}_3$ , 296 K):  $\delta$  = 55.4, 114.1, 120.9, 126.3, 127.3, 127.4, 127.5, 129.6, 130.3, 130.9, 131.1, 131.5, 143.4, 150.9, 152.2, 156.2, 159.5; LR-ESIMS:  $m/z$  = 365  $[\text{MNH}_4]^+$ ; HR-ESIMS:  $m/z$  = 365.1499 (calcd. for  $\text{C}_{21}\text{H}_{21}\text{O}_4\text{N}_2$ , 365.1496).

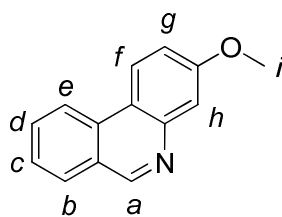

### 3-Methoxyphenanthridine - 2

$^1\text{H}$  NMR spectrum was consistent with that reported in the literature.<sup>1</sup>  $^1\text{H}$  NMR (400 MHz,  $\text{CDCl}_3$ , 295 K):  $\delta$  = 4.00 (s, 3H,  $\text{H}_i$ ), 7.33 (dd,  $J$  = 2.7 Hz, 9.0 Hz, 1H,  $\text{H}_g$ ), 7.61 (d,  $J$  = 2.7 Hz, 1H,  $\text{H}_h$ ), 7.64 (d,  $J$  = 1.0 Hz, 7.1 Hz, 1H,  $\text{H}_d$ ), 7.84 (dd,  $J$  = 1.3 Hz, 7.0 Hz, 1H,  $\text{H}_c$ ), 8.03 (d,  $J$  = 8.0 Hz, 1H,  $\text{H}_e$ ), 8.48 (d,  $J$  = 9.0 Hz, 1H,  $\text{H}_f$ ), 8.52 (d,  $J$  = 8.1 Hz, 1H,  $\text{H}_b$ ), 9.26 (s, 1H,  $\text{H}_a$ ).

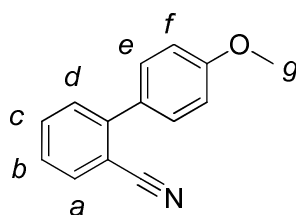

### 4'-Methoxybiphenyl-2-carbonitrile – 3

$^1\text{H}$  NMR spectrum was consistent with that reported in the literature.<sup>4</sup>  $^1\text{H}$  NMR (400 MHz,  $\text{CDCl}_3$ , 295 K):  $\delta$  = 3.87 (s, 3H,  $\text{H}_g$ ), 7.02 (d,  $J$  = 8.9 Hz, 2H,  $\text{H}_f$ ), 7.40 (dd,  $J$  = 1.4 Hz, 7.7 Hz, 1H,  $\text{H}_c$ ), 7.51 (m, 3H,  $\text{H}_{a,e}$ ), 7.62 (dd,  $J$  = 1.4 Hz, 7.7 Hz, 1H,  $\text{H}_b$ ), 7.74 (ddd,  $J$  = 0.5 Hz, 1.4 Hz, 7.7 Hz, 1H,  $\text{H}_d$ ).

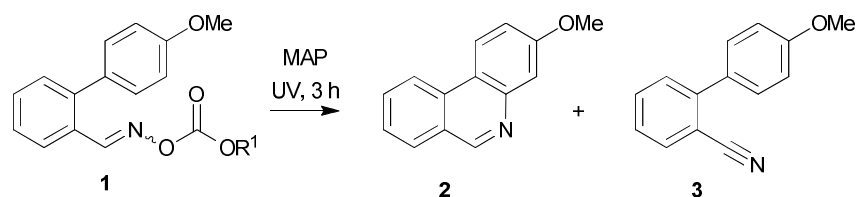

**Scheme S2:** Synthesis of 3-methoxyphenanthridine **2** and nitrile **3**, see table S1 for conditions and results.

**Table S1:** Solvent screening results for the UV photolysis of **1**.

| Entry | R <sup>1</sup> | Solvent           | Yield of <b>2</b> (%) | Yield of <b>3</b> (%) |
|-------|----------------|-------------------|-----------------------|-----------------------|
| 1     | Et             | PhCF <sub>3</sub> | 30                    | 27                    |
| 2     | Ph             | PhCF <sub>3</sub> | 41                    | 40                    |
| 3     | Ph             | MeCN              | 40 <sup>a</sup>       | 45 <sup>a</sup>       |
| 4     | Ph             | DMF               | 41 <sup>a</sup>       | 36 <sup>a</sup>       |
| 5     | Ph             | <i>t</i> BuOH     | 75                    | 20                    |

<sup>a</sup> <sup>1</sup>H NMR estimated yields using CH<sub>2</sub>Br<sub>2</sub> as an internal standard.

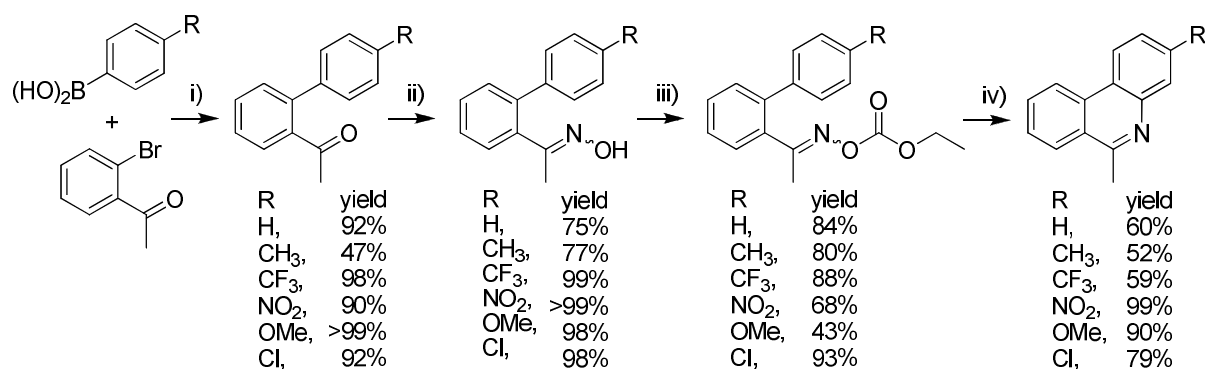

**Scheme S3:** Synthesis of substituted 6-methylphenanthridine derivatives. Reagents and conditions: i)

Pd(PPh<sub>3</sub>)<sub>4</sub>, K<sub>2</sub>CO<sub>3</sub>, toluene, EtOH, reflux, 18 h, Ar; ii) NH<sub>2</sub>OH.HCl, NaOAc, EtOH, reflux, 18 h; iii) EtOCO<sub>2</sub>Cl, pyridine, CH<sub>2</sub>Cl<sub>2</sub>, rt, 18 h; iv) MAP, PhCF<sub>3</sub>, UV irradiation, 3 h.

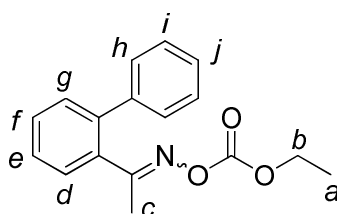

## 2-Acetyl-biphenyl *O*-ethoxycarbonyl oxime – **4a**

Prepared from 2-acetyl-biphenyl oxime<sup>2</sup> (0.600 g, 2.84 mmol), ethyl chloroformate (0.27 mL, 2.84 mmol) and pyridine (0.33 mL, 2.84 mmol). Yellow oil (0.683 g, yield = 84%). <sup>1</sup>H NMR



(400 MHz, CDCl<sub>3</sub>, 295 K):  $\delta$  = 1.38 (t,  $J$  = 7.1 Hz, 3H, H<sub>a</sub>), 1.76 (s, 3H, H<sub>c</sub>), 4.35 (q,  $J$  = 7.1 Hz, 2H, H<sub>b</sub>), 7.33-7.42 (m, 7H, H<sub>ArH</sub>), 7.45-7.54 (m, 2H, H<sub>ArH</sub>); <sup>13</sup>C NMR (100 MHz, CDCl<sub>3</sub>, 295 K):  $\delta$  = 14.3, 18.0, 64.7, 127.4, 127.7, 128.6, 128.9, 129.7, 129.9, 130.3, 134.9, 140.4, 140.6, 153.9, 166.7; LR-ESIMS:  $m/z$  = 306 [MNa]<sup>+</sup>; HR-ESIMS:  $m/z$  = 306.1109 (calcd. for C<sub>17</sub>H<sub>17</sub>NO<sub>3</sub>Na, 306.1106).

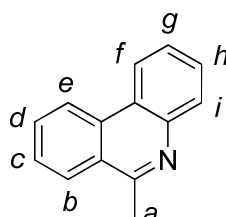

### 6-Methylphenanthridine - 5a

Prepared from 2-acetyl-biphenyl *O*-ethoxycarbonyl oxime (0.059 g, 0.021 mmol). Colourless solid (0.024 g, yield = 60%). <sup>1</sup>H and <sup>13</sup>C NMR spectrum were consistent with those reported in the literature.<sup>2</sup> M.p. = 65 °C; <sup>1</sup>H NMR (300 MHz, CDCl<sub>3</sub>, 296 K):  $\delta$  = 3.09 (s, 3H, H<sub>a</sub>), 7.64-7.76 (m, 3H, H<sub>d,g,h</sub>), 7.87 (dd,  $J$  = 1.3 Hz, 7.7 Hz, 1H, H<sub>c</sub>), 8.18 (d,  $J$  = 8.0 Hz, 1H, H<sub>i</sub>), 8.25 (d,  $J$  = 8.2 Hz, 1H, H<sub>e</sub>), 8.55 (d,  $J$  = 8.1 Hz, 1H, H<sub>f</sub>), 8.65 (d,  $J$  = 8.3 Hz, 1H, H<sub>b</sub>); <sup>13</sup>C NMR (75 MHz, CDCl<sub>3</sub>, 296 K):  $\delta$  = 23.8, 122.4, 122.7, 124.2, 126.3, 126.7, 127.0, 127.7, 129.1, 129.8, 130.9, 133.0, 144.1, 159.3.

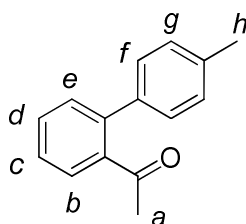

### 2-*p*-Tolylacetophenone

Prepared from *p*-tolylboronic acid (0.400 g, 3.00 mmol), 2'-bromoacetophenone (0.33 mL, 2.50 mmol), tetrakis(triphenylphosphine)palladium(II) (0.283 g, 0.25 mmol) and potassium carbonate (1.016 g, 7.40 mmol). Colourless oil (0.271 g, yield = 47%). <sup>1</sup>H and <sup>13</sup>C NMR

spectra were consistent with those reported in the literature.<sup>5</sup>  $^1\text{H}$  NMR (400 MHz,  $\text{CDCl}_3$ , 296 K):  $\delta$  = 2.01 (s, 3H,  $\text{H}_a$ ), 2.41 (s, 3H,  $\text{H}_h$ ), 7.24 (s, 4H,  $\text{H}_{f,g}$ ), 7.37-7.42 (m, 2H,  $\text{H}_{c,d}$ ), 7.48-7.54 (m, 2H,  $\text{H}_{b,e}$ );  $^{13}\text{C}$  NMR (75 MHz,  $\text{CDCl}_3$ , 296 K):  $\delta$  = 21.6, 30.9, 127.6, 128.2, 129.2, 129.8, 130.6, 131.1, 138.2 ( $\times 2$ ), 140.9, 141.3, 205.6.

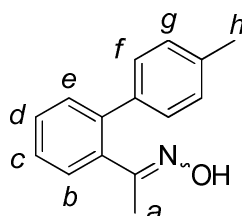

### 2-*p*-Tolylacetophenone oxime

Prepared from 2-*p*-tolylacetophenone (0.246 g, 1.20 mmol), hydroxylamine hydrochloride (0.163 g, 2.30 mmol) and sodium acetate (0.192 g, 2.30 mmol). Colourless oil (0.209 g, yield = 77%). Two isomers (1:4).  $^1\text{H}$  NMR (400 MHz,  $\text{CDCl}_3$ , 296 K):  $\delta$  = 1.70/1.76 (s, 3H,  $\text{H}_a$ ), 2.39 (s, 3H,  $\text{H}_h$ ), 7.19-7.22 (m, 2H,  $\text{H}_g$ ), 7.28-7.30 (m, 2H,  $\text{H}_f$ ), 7.32-7.45 (m, 4H,  $\text{H}_{b,c,d,e}$ );  $^{13}\text{C}$  NMR (75 MHz,  $\text{CDCl}_3$ , 296 K):  $\delta$  = 16.3, 21.6, 127.6, 129.2, 129.4, 129.5, 129.6, 130.7, 137.1, 137.5, 138.4, 141.0, 160.0; LR-ESIMS:  $m/z$  = 248  $[\text{MNa}]^+$ ; HR-ESIMS:  $m/z$  = 248.1048 (calcd. for  $\text{C}_{15}\text{H}_{15}\text{NONa}$ , 248.1051).

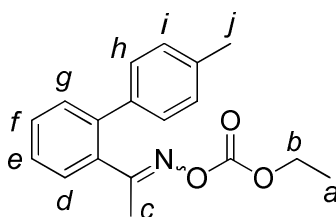

### 2-*p*-Tolylacetophenone *O*-ethoxycarbonyl oxime – 4b

Prepared from 2-*p*-tolylacetophenone oxime (0.142 g, 0.63 mmol), ethyl chloroformate (0.06 mL, 0.63 mmol) and pyridine (0.05 mL, 0.63 mmol). Colourless oil (0.150 g, yield = 80%). Two isomers (1:3).  $^1\text{H}$  NMR (400 MHz,  $\text{CDCl}_3$ , 295 K):  $\delta$  = 1.39 (t,  $J$  = 7.1 Hz, 3H,  $\text{H}_a$ ), 1.77/2.05 (s, 3H,  $\text{H}_c$ ), 2.39/2.40 (s, 3H,  $\text{H}_j$ ), 4.36 (q,  $J$  = 7.1 Hz, 2H,  $\text{H}_b$ ), 7.21 (d,  $J$  = 7.8 Hz,

2H,  $H_i$ ), 7.29-7.52 (m, 5H,  $H_{e,f,g,h}$ ), 7.75 (m, 1H,  $H_d$ );  $^{13}\text{C}$  NMR (100 MHz,  $\text{CDCl}_3$ , 297 K):  $\delta$  = 14.7, 18.4, 21.6, 65.1, 127.4, 127.6, 129.0, 129.2, 129.7, 130.1, 130.3, 130.6, 137.9, 141.0, 153.4, 167.3; LR-ESIMS:  $m/z$  = 320  $[\text{MNa}]^+$ ; HR-ESIMS:  $m/z$  = 320.1256 (calcd. for  $\text{C}_{18}\text{H}_{19}\text{NO}_3\text{Na}$ , 320.1263).

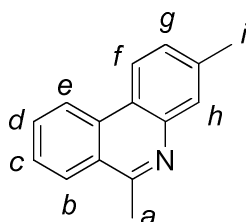

### 3,6-Dimethylphenanthridine – 5b

Prepared from 2-*p*-tolylacetophenone *O*-ethoxycarbonyl oxime (0.051 g, 0.172 mmol). Tan coloured solid (0.018 g, yield = 52%). M.p. = 89-91 °C;  $^1\text{H}$  NMR (400 MHz,  $\text{CDCl}_3$ , 295 K):  $\delta$  = 2.59 (s, 3H,  $H_i$ ), 3.04 (s, 3H,  $H_a$ ), 7.45 (d,  $J$  = 8.3 Hz, 1H,  $H_g$ ), 7.66 (m, 1H,  $H_d$ ), 7.82 (m, 1H,  $H_c$ ), 7.91 (s, 1H,  $H_h$ ), 8.20 (dd,  $J$  = 0.4 Hz, 1H,  $H_e$ ), 8.42 (d,  $J$  = 8.3 Hz, 1H,  $H_f$ ), 8.59 (d,  $J$  = 8.3 Hz, 1H,  $H_b$ );  $^{13}\text{C}$  NMR (100 MHz,  $\text{CDCl}_3$ , 296 K):  $\delta$  = 21.6, 23.4, 121.4, 121.7, 122.1, 125.6, 126.5, 126.8, 128.0, 129.0, 130.4, 132.7, 138.8, 143.8, 158.9; LR-EIMS:  $m/z$  = 207  $[\text{M}]^+$ ; HR-ESIMS:  $m/z$  = 207.1042 (calcd. for  $\text{C}_{15}\text{H}_{13}\text{N}$ , 207.1043).

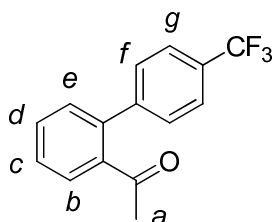

### 2-*p*-Trifluoromethylphenylacetophenone

Prepared from 4-trifluoromethylphenylboronic acid (0.407 g, 2.14 mmol), 2'-bromoacetophenone (0.356 g, 1.79 mmol), tetrakis(triphenylphosphine) palladium(II) (0.208 g, 0.18 mmol), and potassium carbonate (0.746 g, 5.40 mmol). Yellow oil (0.466 g, yield = 98%).  $^1\text{H}$  NMR (400 MHz,  $\text{CDCl}_3$ , 295 K):  $\delta$  = 2.14 (s, 3H,  $H_a$ ), 7.37 (dd,  $J$  = 1.0 Hz,

7.5 Hz, 1H, H<sub>e</sub>), 7.44-7.60 (m, 3H, H<sub>d,g</sub>), 7.55 (dd, *J* = 1.5 Hz, 7.5 Hz, 1H, H<sub>c</sub>), 7.62 (dd, *J* = 1.2 Hz, 7.6 Hz, 1H, H<sub>b</sub>), 7.69 (d, *J* = 8.0 Hz, 2H, H<sub>g</sub>); <sup>13</sup>C NMR (100 MHz, CDCl<sub>3</sub>, 295 K): δ = 30.4, 125.5 (q, <sup>3</sup>*J*<sub>CF</sub> = 3.6 Hz), 126.9 (q, <sup>1</sup>*J*<sub>CF</sub> = 281.1 Hz), 128.2 (× 2), 129.1, 129.9 (q, <sup>2</sup>*J*<sub>CF</sub> = 33.0 Hz), 130.5, 131.0, 139.2, 140.4, 144.6, 203.5; <sup>19</sup>F NMR (400 MHz, CDCl<sub>3</sub>, 295 K): δ = -62.96 (CF<sub>3</sub>); LR-EIMS: *m/z* = 264 [M]<sup>+</sup>; HR-MS: *m/z* = 264.0756 (calcd. for C<sub>15</sub>H<sub>11</sub>OF<sub>3</sub>, 264.0757).

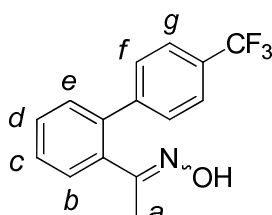

### 2-*p*-Trifluoromethylphenylacetophenone oxime

Prepared from 2-*p*-trifluoromethylphenylacetophenone (0.264 g, 3.4 mmol), hydroxylamine hydrochloride (0.473 g, 6.8 mmol) and sodium acetate (0.558 g, 6.8 mmol). Colourless oil (0.734 g, yield >99%). Two isomers 1:6.6. <sup>1</sup>H NMR (400 MHz, CDCl<sub>3</sub>, 296 K): δ = 1.94/2.07 (s, 3H, H<sub>a</sub>), 7.30 (dd, *J* = 1.0 Hz, 7.2 Hz, 1H, H<sub>b</sub>), 7.38 (d, *J* = 8.0 Hz, 2H, H<sub>f</sub>), 7.42 (dd, *J* = 1.4 Hz, 7.5 Hz, 1H, H<sub>e</sub>), 7.48 (m, 1H, H<sub>c</sub>), 7.54 (m, 1H, H<sub>d</sub>), 7.62 (d, *J* = 8.0 Hz, 2H, H<sub>g</sub>); <sup>13</sup>C NMR (100 MHz, CDCl<sub>3</sub>, 296 K): δ = 30.8, 126.0, 126.4, 128.6, 129.3, 129.5, 130.9, 131.4, 135.3, 138.9, 142.5, 145.0, 164.9; <sup>19</sup>F NMR (400 MHz, CDCl<sub>3</sub>, 296 K): δ = -63.0 (CF<sub>3</sub>).

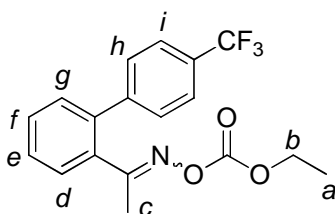

### 2-*p*-Trifluoromethylphenylacetophenone *O*-ethoxycarbonyl oxime – 4c

Prepared from 2-*p*-trifluoromethylphenylacetophenone oxime (0.466 g, 1.70 mmol), ethyl chloroformate (0.13 mL, 1.70 mmol) and pyridine (0.16 mL, 1.70 mmol). Colourless oil

(0.528 g, yield = 88%). Two isomers 1:2.5.  $^1\text{H}$  NMR (400 MHz,  $\text{CDCl}_3$ , 295 K):  $\delta$  = 1.29/1.39 (t,  $J$  = 7.1 Hz, 3H,  $\text{H}_a$ ), 1.79/2.01 (s, 3H,  $\text{H}_c$ ), 4.23/4.35 (q,  $J$  = 7.1 Hz, 2H,  $\text{H}_b$ ), 7.37-7.57 (m, 6H,  $\text{H}_{ArH}$ ), 7.63-7.70 (m, 2H,  $\text{H}_{ArH}$ );  $^{13}\text{C}$  NMR (100 MHz,  $\text{CDCl}_3$ , 295 K):  $\delta$  = 14.3, 18.2, 64.8, 125.6 (q,  $^3J_{\text{CF}}$  = 3.5 Hz), 126.8 (q,  $^1J_{\text{CF}}$  = 269.0 Hz), 128.3, 129.3, 129.7 (q,  $^2J_{\text{CF}}$  = 36.7 Hz), 129.8, 130.1, 130.2, 135.0, 139.0, 144.1, 153.8, 165.9;  $^{19}\text{F}$  NMR (400 MHz,  $\text{CDCl}_3$ , 295 K):  $\delta$  = -63.0 ( $\text{CF}_3$ ); LR-ESIMS:  $m/z$  = 352 [ $\text{MH}$ ] $^+$ ; HR-ESIMS:  $m/z$  = 352.1158 (calcd. for  $\text{C}_{18}\text{H}_{17}\text{O}_3\text{NF}_3$ , 352.1155).

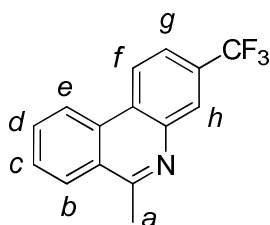

### 6-Methyl-3-(trifluoromethyl)phenanthridine – 5c

Prepared from 2-*p*-trifluoromethylphenylacetophenone *O*-ethoxycarbonyl oxime (0.059 g, 0.168 mmol). Colourless solid (0.026 g, yield = 59%). M.p. = 72 °C;  $^1\text{H}$  NMR (400 MHz,  $\text{CDCl}_3$ , 300 K):  $\delta$  = 3.05 (s, 3H,  $\text{H}_a$ ), 7.75-7.81 (m, 2H,  $\text{H}_{d,g}$ ), 7.87-7.91 (m, 1H,  $\text{H}_c$ ), 8.25 (dd,  $J$  = 0.7 Hz, 8.2 Hz, 1H,  $\text{H}_f$ ), 8.38 (s, 1H,  $\text{H}_h$ ), 8.59-8.63 (m 2H,  $\text{H}_{b,e}$ );  $^{13}\text{C}$  NMR (100 MHz,  $\text{CDCl}_3$ , 297 K):  $\delta$  = 23.4, 122.2 (q,  $^3J_{\text{CF}}$  = 3.4 Hz), 122.7, 123.0, 124.2 (q,  $^1J_{\text{CF}}$  = 272.2 Hz), 126.1, 126.5, 126.7, 126.9 (q,  $^3J_{\text{CF}}$  = 4.0 Hz), 128.5, 130.4, (q,  $^2J_{\text{CF}}$  = 32.6 Hz), 131.0, 131.7, 143.0, 160.5;  $^{19}\text{F}$  NMR (400 MHz,  $\text{CDCl}_3$ , 296 K):  $\delta$  = -62.75 ( $\text{CF}_3$ ); LR-EIMS:  $m/z$  = 261 [ $\text{M}$ ] $^+$ ; HR-ESIMS:  $m/z$  = 261.0762 (calcd. for  $\text{C}_{15}\text{H}_{10}\text{NF}_3$ , 261.0760).

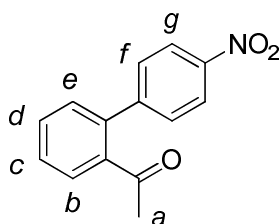

### 2-*p*-Nitrophenylacetophenone

Prepared from 4-nitrophenylboronic acid (0.235 g, 1.41 mmol), 2'-bromoacetophenone (0.16 mL, 1.17 mmol), tetrakis(triphenylphosphine) palladium(II) (0.139 g, 0.12 mmol), and potassium carbonate (0.487 g, 3.52 mmol). Colourless solid (0.308 g, yield = 90%). M.p. = 95 °C;  $^1\text{H}$  NMR (400 MHz,  $\text{CDCl}_3$ , 295 K):  $\delta$  = 2.26 (s, 3H,  $\text{H}_a$ ), 7.36 (d,  $J$  = 7.5 Hz, 1H,  $\text{H}_b$ ), 7.47 (d,  $J$  = 8.7 Hz, 2H,  $\text{H}_f$ ), 7.52 (m, 1H,  $\text{H}_d$ ), 7.58 (m, 1H,  $\text{H}_c$ ), 7.69 (d,  $J$  = 7.5 Hz, 1H,  $\text{H}_e$ ), 8.28 (d,  $J$  = 8.7 Hz, 2H,  $\text{H}_g$ );  $^{13}\text{C}$  NMR (100 MHz,  $\text{CDCl}_3$ , 295 K):  $\delta$  = 30.1, 123.7, 128.6, 128.7, 129.6, 130.5, 131.3, 133.1, 138.7, 139.7, 148.0, 202.4; LR-EIMS:  $m/z$  = 241  $[\text{M}]^+$ ; HR-ESIMS:  $m/z$  = 241.0732 (calcd. for  $\text{C}_{14}\text{H}_{11}\text{O}_3\text{N}$ , 241.0733).

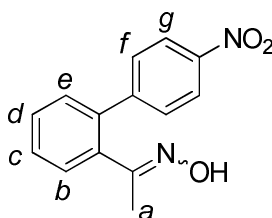

### 2-*p*-Nitrophenylacetophenone oxime

Prepared from 2-*p*-nitrophenylacetophenone (0.302 g, 1.25 mmol), hydroxylamine hydrochloride (0.174 g, 2.50 mmol) and sodium acetate (0.205 g, 2.50 mmol). Colourless oil (0.344 g, yield >99%). Two isomers 1:2.5.  $^1\text{H}$  NMR (400 MHz,  $\text{CDCl}_3$ , 295 K):  $\delta$  = 1.72/1.76 (s, 3H,  $\text{H}_a$ ), 7.29-7.33 (m, 2H,  $\text{H}_{c,d}$ ), 7.37-7.42 (m, 2H,  $\text{H}_{b,e}$ ), 7.47 (d,  $J$  = 8.9 Hz, 2H,  $\text{H}_g$ ), 8.20 (d,  $J$  = 8.9 Hz, 2H,  $\text{H}_f$ );  $^{13}\text{C}$  NMR (100 MHz,  $\text{CDCl}_3$ , 295 K):  $\delta$  = 16.1, 123.6, 126.0, 127.8, 128.6, 129.0, 129.3, 129.4, 136.8, 147.1, 147.9, 158.0; LR-ESIMS:  $m/z$  = 256  $[\text{M}]^+$ .

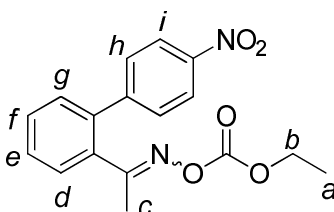

### 2-*p*-Nitrophenylacetophenone *O*-ethoxycarbonyl oxime – 4d RM1-11 RG13

Prepared from 2-*p*-nitrophenylacetophenone oxime (0.335 g, 1.31 mmol), ethyl chloroformate (0.12 mL, 1.31 mmol) and pyridine (0.10 mL, 1.31 mmol). Tan coloured solid (0.279 g, yield = 68%); M.p. = 91-92 °C; <sup>1</sup>H NMR (400 MHz, CDCl<sub>3</sub>, 300 K): δ = 1.38 (t, *J* = 7.1 Hz, 3H, H<sub>a</sub>), 1.84 (s, 3H, H<sub>c</sub>), 4.34 (q, *J* = 7.1 Hz, 2H, H<sub>b</sub>), 7.40 (dd, *J* = 0.6 Hz, 7.1 Hz, 1H, H<sub>g</sub>), 7.47 (dd, *J* = 1.4 Hz, 6.7 Hz, 1H, H<sub>e</sub>), 7.51-7.55 (m, 2H, H<sub>d,f</sub>), 7.59 (d, *J* = 8.58 Hz, 2H, H<sub>g</sub>), 8.28 (d, *J* = 8.8 Hz, 2H, H<sub>f</sub>); <sup>13</sup>C NMR (75 MHz, CDCl<sub>3</sub>, 300 K): δ = 14.7, 18.7, 65.3, 124.2, 129.2, 130.3 (× 2), 130.6 (× 2), 135.5, 138.6, 147.6, 147.7, 154.1, 165.7; LR-ASAPMS: *m/z* = 329 [MH]<sup>+</sup>; HR-ASAPMS: *m/z* = 329.1133 (calcd. for C<sub>17</sub>H<sub>17</sub>O<sub>5</sub>N<sub>2</sub>, 329.1132).

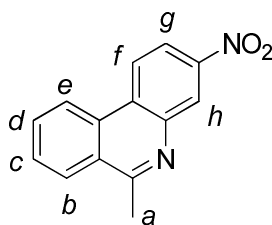

### 6-Methyl-3-nitrophenanthridine – 5d

Prepared from 2-*p*-nitrophenylacetophenone *O*-ethoxycarbonyl oxime (0.088 g, 0.27 mmol). Tan coloured solid (0.058 g, yield = 99%). M.p. = 167 °C (dec.); <sup>1</sup>H NMR (400 MHz, CDCl<sub>3</sub>, 300 K): δ = 3.09 (s, 3H, H<sub>a</sub>), 7.85 (m, 1H, H<sub>d</sub>), 7.95 (m, 1H, H<sub>c</sub>), 8.30 (dd, *J* = 0.7 Hz, 8.2 Hz, 1H, H<sub>e</sub>), 8.40 (dd, *J* = 2.4 Hz, 9.0 Hz, 1H, H<sub>g</sub>), 8.65 (d, *J* = 9.0 Hz, 1H, H<sub>f</sub>), 8.66 (d, *J* = 8.1 Hz, 1H, H<sub>b</sub>), 8.96 (d, *J* = 2.4 Hz, 1H, H<sub>h</sub>); <sup>13</sup>C NMR (100 MHz, CDCl<sub>3</sub>, 300 K): δ = 25.5, 120.1, 123.2, 123.4, 125.2, 126.8, 126.9, 128.5, 129.4, 131.3, 131.4, 143.2, 147.5, 161.7; LR-EIMS: *m/z* = 238 [M]<sup>+</sup>; HR-ESIMS: *m/z* = 238.0737 (calcd. for C<sub>14</sub>H<sub>10</sub>O<sub>2</sub>N<sub>2</sub>, 238.0737).

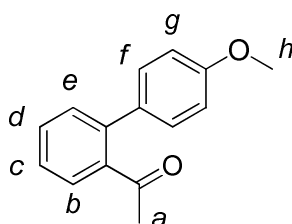

## 2-*p*-Methoxyphenylacetophenone

Prepared from 4-methoxyphenylboronic acid (0.396 g, 2.61 mmol), 2'-bromoacetophenone (0.3 mL, 2.17 mmol), tetrakis(triphenylphosphine) palladium(II) (0.254 g, 0.22 mmol), and potassium carbonate (0.899 g, 6.51 mmol). Colourless oil (0.573 g, yield >99%). <sup>1</sup>H NMR spectrum was consistent with that reported in the literature.<sup>6</sup> <sup>1</sup>H NMR (400 MHz, CDCl<sub>3</sub>, 295 K):  $\delta$  = 2.01 (s, 3H, H<sub>a</sub>), 3.86 (s, 3H, H<sub>h</sub>), 6.67 (d,  $J$  = 8.8 Hz, 2H, H<sub>g</sub>), 7.27 (d,  $J$  = 8.8 Hz, 2H, H<sub>f</sub>), 7.36-7.40 (m, 2H, H<sub>c,e</sub>), 7.47-7.53 (m, 2H, H<sub>b,d</sub>).

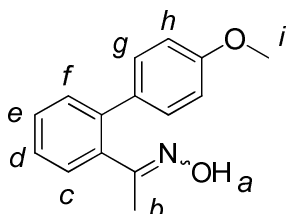

## 2-*p*-Methoxyphenylacetophenone oxime

Prepared from 2-*p*-methoxyphenylacetophenone (0.573 g, 2.53 mmol), hydroxylamine hydrochloride (0.352 g, 5.06 mmol) and sodium acetate (0.415 g, 5.06 mmol). Colourless solid (0.601 g, yield = 98%). M.p. = 108-112 °C; Two isomers 1:3.45. <sup>1</sup>H NMR (400 MHz, CDCl<sub>3</sub>, 295 K):  $\delta$  = 1.70/1.76 (s, 3H, H<sub>b</sub>), 3.85 (s, 3H, H<sub>i</sub>), 6.94 (d,  $J$  = 8.8 Hz, 2H, H<sub>h</sub>), 7.30-7.45 (m, 6H, H<sub>ArH</sub>), 8.22-8.62 (br, 1H, H<sub>a</sub>); <sup>13</sup>C NMR (100 MHz, CDCl<sub>3</sub>, 300 K):  $\delta$  = 16.3, 55.7, 114.2, 114.3, 127.4, 129.4, 129.6, 130.5, 130.6, 133.8, 137.1, 140.6, 159.5; LR-ESIMS:  $m/z$  = 242 [MH]<sup>+</sup>; HR-ESIMS:  $m/z$  = 242.1177 (calcd. for C<sub>15</sub>H<sub>16</sub>NO<sub>2</sub>, 242.1176).

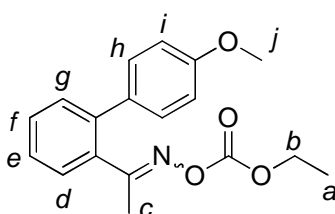

## 2-*p*-Methoxyphenylacetophenone *O*-ethoxycarbonyl oxime – 4e



Prepared from 2-*p*-methoxyphenylacetophenone oxime (0.393 g, 1.63 mmol), ethyl chloroformate (0.15 mL, 1.63 mmol) and pyridine (0.13 mL, 1.63 mmol). Colourless oil (0.220 g, yield = 43%).  $^1\text{H}$  NMR (400 MHz,  $\text{CDCl}_3$ , 295 K):  $\delta$  = 1.39 (t,  $J$  = 7.1 Hz, 3H,  $\text{H}_a$ ), 1.78 (s, 3H,  $\text{H}_c$ ), 3.85 (s, 3H,  $\text{H}_j$ ), 4.36 (q,  $J$  = 7.1 Hz, 2H,  $\text{H}_b$ ), 6.94 (d,  $J$  = 8.8 Hz, 2H,  $\text{H}_i$ ), 7.32-7.38 (m, 4H,  $\text{H}_{ArH}$ ), 7.44-7.51 (m, 2H,  $\text{H}_{ArH}$ );  $^{13}\text{C}$  NMR (100 MHz,  $\text{CDCl}_3$ , 295 K):  $\delta$  = 14.3, 18.0, 55.3, 64.7, 114.1, 127.0, 129.7, 129.9, 130.1, 130.2, 132.8, 134.8, 140.2, 153.9, 159.3, 166.9; LR-ESIMS:  $m/z$  = 336  $[\text{MNa}]^+$ ; HR-ESIMS:  $m/z$  = 336.1209 (calcd. for  $\text{C}_{18}\text{H}_{19}\text{NO}_4\text{Na}$ , 336.1212).

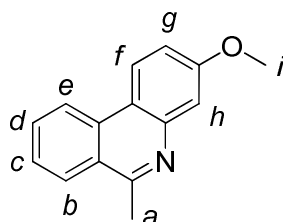

### 3-Methoxy-6-methylphenanthridine – 5e

Prepared from 2-*p*-methoxyphenylacetophenone *O*-ethoxycarbonyl oxime (0.050 g, 0.16 mmol). Yellow oil (0.032 g, yield = 90%).  $^1\text{H}$  NMR (300 MHz,  $\text{CDCl}_3$ , 300 K):  $\delta$  = 3.02 (s, 3H,  $\text{H}_a$ ), 3.97 (s, 3H,  $\text{H}_i$ ), 7.24 (dd,  $J$  = 2.6 Hz, 9.0 Hz, 1H,  $\text{H}_g$ ), 7.51 (d,  $J$  = 2.6 Hz, 1H,  $\text{H}_h$ ), 7.60 (m, 1H,  $\text{H}_c$ ), 7.78 (m, 1H,  $\text{H}_d$ ), 8.17 (d,  $J$  = 8.2 Hz, 1H,  $\text{H}_b$ ), 8.40 (d,  $J$  = 9.0 Hz, 1H,  $\text{H}_f$ ), 8.49 (d,  $J$  = 8.3 Hz, 1H,  $\text{H}_e$ );  $^{13}\text{C}$  NMR (75 MHz,  $\text{CDCl}_3$ , 300 K):  $\delta$  = 23.8, 56.0, 109.7, 117.7, 118.2, 122.2, 123.6, 125.4, 126.6, 127.0, 131.0, 133.2, 145.7, 159.8, 160.5; LR-ESIMS:  $m/z$  = 224  $[\text{MH}]^+$ ; HR-ESIMS:  $m/z$  = 224.1069 (calcd. for  $\text{C}_{15}\text{H}_{14}\text{NO}$ , 224.1075).

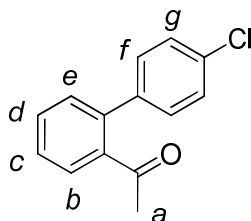

### 2-*p*-Chlorophenylacetophenone

Prepared from 2'-bromoacetophenone (0.920 g, 4.60 mmol), 4-chlorophenylboronic acid (1.080 g, 6.89 mmol), tetrakis(triphenylphosphine) palladium(II) (0.797 g, 0.69 mmol), and potassium carbonate (2.861 g, 20.7 mmol). Yellow oil (0.980 g, yield = 92%).  $^1\text{H}$  NMR (400 MHz,  $\text{CDCl}_3$ , 297 K):  $\delta$  = 2.12 (s, 3H,  $\text{H}_a$ ), 7.30 (d,  $J$  = 8.6 Hz, 2H,  $\text{H}_g$ ), 7.38 (dd,  $J$  = 1.2 Hz, 7.6 Hz, 1H,  $\text{H}_e$ ), 7.42-7.48 (m, 3H,  $\text{H}_{c,f}$ ), 7.52-7.61 (m, 2H,  $\text{H}_{b,d}$ );  $^{13}\text{C}$  NMR (100 MHz,  $\text{CDCl}_3$ , 297 K):  $\delta$  = 30.5, 98.7, 127.8, 128.1, 128.9, 130.1, 130.3, 130.9, 134.1, 139.3, 140.6, 204.2; LR-EIMS:  $m/z$  = 230  $[\text{M}]^+$ ; HR-ESIMS:  $m/z$  = 230.0495 (calcd. for  $\text{C}_{11}\text{H}_{14}\text{O}^{35}\text{Cl}$ , 230.0493).

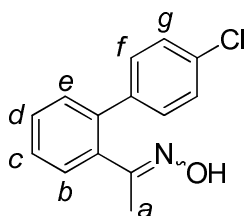

### 2-*p*-Chlorophenylacetophenone oxime

Prepared from 2-*p*-chlorophenylacetophenone (0.900 g, 3.90 mmol), hydroxylamine hydrochloride (0.540 g, 7.80 mmol) and sodium acetate (0.538 g, 7.80 mmol). White solid (0.950 g, yield = 98%). M.p. = 110-114 °C; Two isomers 1:3.25.  $^1\text{H}$  NMR (400 MHz,  $\text{CDCl}_3$ , 297 K):  $\delta$  = 1.74/1.79 (s, 3H,  $\text{H}_a$ ), 7.31-7.47 (m, 8H,  $\text{H}_{ArH}$ ), 8.20-10.00 (br, 1H,  $\text{H}_a$ );  $^{13}\text{C}$  NMR (100 MHz,  $\text{CDCl}_3$ , 297 K): (major isomer)  $\delta$  = 16.2, 127.8, 128.7, 129.2, 129.3, 130.2, 130.3, 133.6, 136.7, 139.3, 139.4, 158.8; LR-EIMS:  $m/z$  = 246  $[\text{MH}]^+$ ; HR-MS:  $m/z$  = 246.0683 (calcd. for  $\text{C}_{14}\text{H}_{13}\text{ON}^{35}\text{Cl}$ , 246.0680).

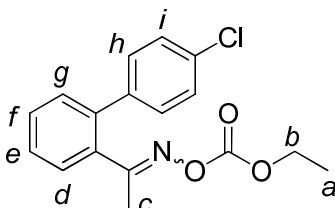

### 2-*p*-Chlorophenylacetophenone *O*-ethoxycarbonyl oxime - 4f

Prepared from 2-*p*-chlorophenylacetophenone oxime (0.800 g, 3.26 mmol), ethyl chloroformate (0.31 mL, 3.26 mmol) and pyridine (0.26 mL, 3.26 mmol). Yellow oil (0.970 g, yield = 93%). Two isomers 1:2.4. <sup>1</sup>H NMR (400 MHz, CDCl<sub>3</sub>, 297 K):  $\delta$  = 1.29/1.38 (t,  $J$  = 7.1 Hz, 3H, H<sub>a</sub>), 1.79/1.98 (s, 3H, H<sub>c</sub>), 4.23/4.35 (q,  $J$  = 7.1 Hz, 2H, H<sub>b</sub>), 7.21-7.28 (m, 1H, H<sub>ArH</sub>), 7.33-7.51 (m, 7H, H<sub>ArH</sub>); <sup>13</sup>C NMR (100 MHz, CDCl<sub>3</sub>, 297 K): (major isomer)  $\delta$  = 14.3, 18.1, 64.7, 127.8, 128.8, 129.7, 130.0, 130.1, 130.2, 133.9, 134.9, 138.9, 139.3, 153.8, 166.2; LR-ESIMS:  $m/z$  = 340 [MNa]<sup>+</sup>; HR-ESIMS:  $m/z$  = 340.0713 (calcd. for C<sub>17</sub>H<sub>16</sub>NO<sub>3</sub>Na<sup>35</sup>Cl, 340.0716).

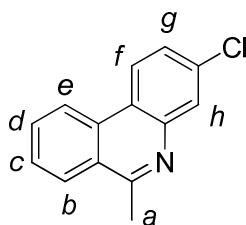

### 3-Chloro-6-methylphenanthridine – 5f

Prepared from 2-*p*-chlorophenylacetophenone *O*-ethoxycarbonyl oxime (0.053 g, 0.17 mmol). Colourless solid (0.030 g, yield = 79%). M.p. = 120-122 °C; <sup>1</sup>H NMR (300 MHz, CDCl<sub>3</sub>, 297 K):  $\delta$  = 3.02 (s, 3H, H<sub>a</sub>), 7.55 (dd,  $J$  = 2.2 Hz, 8.8 Hz, 1H, H<sub>g</sub>), 7.70 (m, 1H, H<sub>c</sub>), 7.84 (m, 1H, H<sub>d</sub>), 8.08 (d,  $J$  = 2.2 Hz, 1H, H<sub>h</sub>), 8.20 (d,  $J$  = 7.6 Hz, 1H, H<sub>b</sub>), 8.41 (d,  $J$  = 8.8 Hz, 1H, H<sub>f</sub>), 8.53 (d,  $J$  = 8.2 Hz, 1H, H<sub>e</sub>); <sup>13</sup>C NMR (75 MHz, CDCl<sub>3</sub>, 298 K):  $\delta$  = 23.8, 122.6, 123.7, 126.2, 127.1, 127.3, 128.0, 129.0, 131.3, 132.5, 134.6, 144.7, 160.7 (× 2); LR-EIMS:  $m/z$  = 227 [M]<sup>+</sup>; HR-ESIMS:  $m/z$  = 227.0499 (calcd. for C<sub>14</sub>H<sub>10</sub>N<sup>35</sup>Cl, 227.0496).

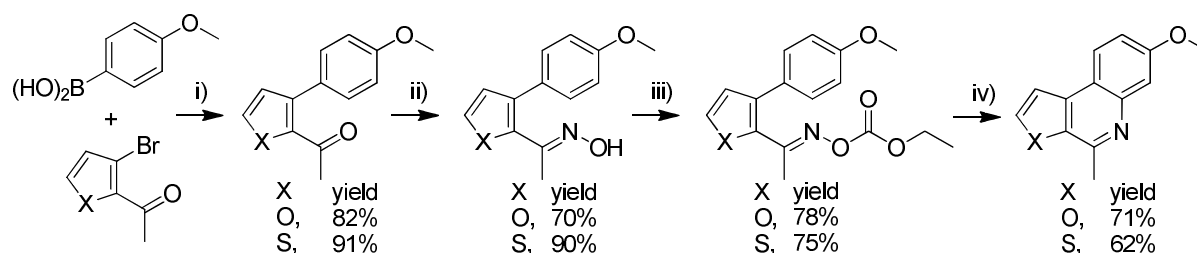

**Scheme S4:** Synthesis of quinoline derivatives. Reagents and conditions: i)  $\text{Pd}(\text{PPh}_3)_4$ ,  $\text{K}_2\text{CO}_3$ , toluene, EtOH, reflux, 18 h, Ar; ii)  $\text{NH}_2\text{OH}\cdot\text{HCl}$ , NaOAc, EtOH, reflux, 18 h; iii)  $\text{EtOCO}_2\text{Cl}$ , pyridine,  $\text{CH}_2\text{Cl}_2$ , rt, 18 h; iv) MAP,  $\text{PhCF}_3$ , UV irradiation, 3 h.

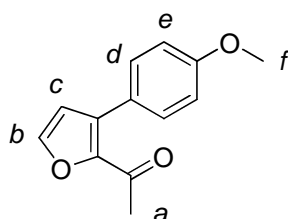

## 2-Acetyl-3-*p*-methoxyphenylfuran

Prepared from 4-methoxyphenylboronic acid (0.202 g, 1.33 mmol), 2-acetyl-3-bromofuran<sup>3</sup> (0.209 g, 1.11 mmol), tetrakis(triphenylphosphine) palladium(II) (0.127 g, 0.11 mmol) and potassium carbonate (0.460 g, 3.33 mmol). Yellow oil (0.233 g, yield = 91%).  $^1\text{H}$  NMR (400 MHz,  $\text{CDCl}_3$ , 296 K):  $\delta$  = 2.47 (s, 3H,  $\text{H}_a$ ), 3.85 (s, 3H,  $\text{H}_f$ ), 6.64 (d,  $J$  = 1.7 Hz, 1H,  $\text{H}_c$ ), 6.94 (d,  $J$  = 8.9 Hz, 2H,  $\text{H}_e$ ), 7.53 (d,  $J$  = 1.7 Hz, 1H,  $\text{H}_b$ ), 7.63 (d,  $J$  = 8.9 Hz, 2H,  $\text{H}_d$ ); (%).  $^1\text{H}$  NMR (100 MHz,  $\text{CDCl}_3$ , 296 K):  $\delta$  = 27.7, 55.3, 113.6, 114.8, 124.1, 130.6, 133.3, 144.5, 147.0, 159.9, 188.0; LR-ESIMS:  $m/z$  = 239  $[\text{MNa}]^+$ ; HR-ESIMS:  $m/z$  = 239.0692 (calcd. for  $\text{C}_{13}\text{H}_{12}\text{O}_3\text{Na}$ , 239.0684).

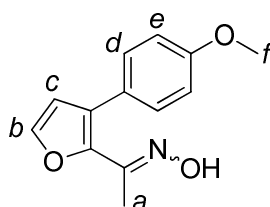

## 2-Acetyl-3-*p*-methoxyphenylfuran oxime

Prepared from 2-acetyl-3-*p*-methoxyphenylfuran (0.193 g, 0.89 mmol), hydroxylamine hydrochloride (0.124 g, 1.80 mmol) and sodium acetate (0.148 g, 1.80 mmol). Off-white

solid (0.186 g, yield = 90%). M.p. = 130-132 °C;  $^1\text{H}$  NMR (400 MHz,  $\text{CDCl}_3$ , 296 K):  $\delta$  = 2.08 (s, 3H,  $\text{H}_a$ ), 3.83 (s, 3H,  $\text{H}_f$ ), 6.50 (d,  $J$  = 1.8 Hz, 1H,  $\text{H}_c$ ), 6.91 (d,  $J$  = 8.8 Hz, 2H,  $\text{H}_e$ ), 7.37 (d,  $J$  = 8.8 Hz, 2H,  $\text{H}_d$ ), 7.44 (d,  $J$  = 1.8 Hz, 1H,  $\text{H}_b$ );  $^{13}\text{C}$  NMR (75 MHz,  $\text{CDCl}_3$ , 296 K):  $\delta$  = 12.8, 55.7, 114.1, 114.5, 120.9, 126.0, 126.2, 129.8, 130.5, 142.7, 150.3; LR-ESIMS:  $m/z$  = 254  $[\text{MNa}]^+$ ; HR-ESIMS:  $m/z$  = 254.0787 (calcd. for  $\text{C}_{13}\text{H}_{13}\text{NO}_3\text{Na}$ , 254.0793).

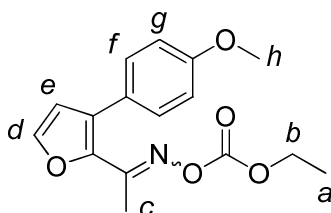

### 2-Acetyl-3-*p*-methoxyphenylfuran *O*-ethoxycarbonyl oxime – 6a

Prepared from 2-acetyl-3-*p*-methoxyphenylfuran oxime (0.179 g, 4.30 mmol), ethyl chloroformate (0.41 mL, 4.30 mmol) and pyridine (0.35 mL, 4.30 mmol). Colourless oil (0.178 g, yield = 75%).  $^1\text{H}$  NMR (400 MHz,  $\text{CDCl}_3$ , 296 K):  $\delta$  = 1.37 (t,  $J$  = 7.1 Hz, 3H,  $\text{H}_a$ ), 2.19 (s, 3H,  $\text{H}_c$ ), 3.84 (s, 3H,  $\text{H}_h$ ), 4.34 (q,  $J$  = 7.1 Hz, 2H,  $\text{H}_b$ ), 6.56 (d,  $J$  = 1.8 Hz, 1H,  $\text{H}_e$ ), 6.93 (d,  $J$  = 8.8 Hz, 2H,  $\text{H}_g$ ), 7.48-7.52 (m, 3H,  $\text{H}_{d,f}$ );  $^{13}\text{C}$  NMR (100 MHz,  $\text{CDCl}_3$ , 296 K):  $\delta$  = 14.3, 14.3, 55.3, 64.8, 113.7, 114.5, 124.8, 129.1, 130.7, 142.3, 143.5, 153.6, 155.5, 159.5; LR-ESIMS:  $m/z$  = 326  $[\text{M}]^+$ ; HR-ESIMS:  $m/z$  = 326.1016 (calcd. for  $\text{C}_{16}\text{H}_{17}\text{NO}_5\text{Na}$ , 326.1004).

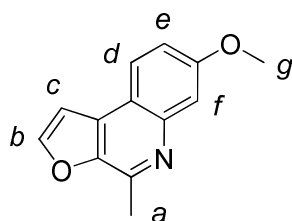

### 7-Methoxy-4-methylfuro[2,3-*c*]quinoline – 7a

Prepared from 2-acetyl-3-*p*-methoxyphenylfuran *O*-ethoxycarbonyl oxime (0.052 g, 0.17 mmol). Colourless oil (0.026 g, yield = 71%).  $^1\text{H}$  NMR (400 MHz,  $\text{CDCl}_3$ , 295 K):  $\delta$  = 2.90

(s, 3H,  $H_a$ ), 3.95 (s, 3H,  $H_g$ ), 7.19 (d,  $J = 2.0$  Hz, 1H,  $H_c$ ), 7.23 (dd,  $J = 2.5$  Hz, 8.9 Hz, 1H,  $H_e$ ), 7.53 (d,  $J = 2.5$  Hz, 1H,  $H_f$ ), 7.83 (d,  $J = 2.0$  Hz, 1H,  $H_b$ ), 7.95 (d,  $J = 8.9$  Hz, 1H,  $H_d$ );  $^{13}\text{C}$  NMR (100 MHz,  $\text{CDCl}_3$ , 295 K):  $\delta = 19.8, 55.9, 105.8, 108.5, 117.6, 118.6, 124.7, 129.8, 145.9, 146.2, 147.4 (\times 2), 159.6$ ; LR-ESIMS:  $m/z = 214$  [ $MH$ ] $^+$ ; HR-ESIMS:  $m/z = 214.0862$  (calcd. for  $\text{C}_{13}\text{H}_{12}\text{NO}_2$ , 214.0868).

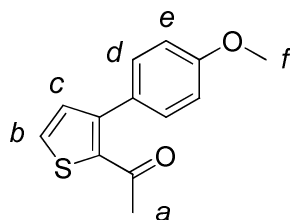

### 2-Acetyl-3-*p*-methoxyphenylthiophene

Prepared from 4-methoxyphenylboronic acid (0.180 g, 1.18 mmol), 2-acetyl-3-bromothiophene (0.202 g, 1.00 mmol), tetrakis(triphenylphosphine) palladium(II) (0.116 g, 0.01 mmol) and potassium carbonate (0.415 g, 3.00 mmol). Yellow oil (0.192 g, yield = 82%).  $^1\text{H}$  NMR (300 MHz,  $\text{CDCl}_3$ , 295 K):  $\delta = 2.15$  (s, 3H,  $H_a$ ), 3.84 (s, 3H,  $H_g$ ), 6.94 (d,  $J = 8.8$  Hz, 2H,  $H_e$ ), 7.02 (d,  $J = 5.0$  Hz, 1H,  $H_c$ ), 7.29 (d,  $J = 8.8$  Hz, 2H,  $H_d$ ), 7.52 (d,  $J = 5.0$  Hz, 1H,  $H_b$ );  $^{13}\text{C}$  NMR (75 MHz,  $\text{CDCl}_3$ , 295 K):  $\delta = 29.3, 55.3, 113.8, 128.6, 130.4, 130.9, 132.1, 139.5, 146.7, 159.7, 192.3$ ; LR-ESIMS:  $m/z = 233$  [ $M$ ] $^+$ ; HR-ESIMS:  $m/z = 233.0639$  (calcd. for  $\text{C}_{13}\text{H}_{13}\text{O}_2\text{S}$ , 233.0636).

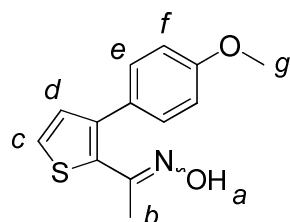

### 2-Acetyl-3-*p*-methoxyphenylthiophene oxime

Prepared from 2-acetyl-3-*p*-methoxyphenylthiophene (0.186 g, 0.80 mmol), hydroxylamine hydrochloride (0.111 g, 1.60 mmol) and sodium acetate (0.131 g, 1.60 mmol). Colourless oil

(0.138 g, yield = 70%).  $^1\text{H}$  NMR (400 MHz,  $\text{CDCl}_3$ , 295 K):  $\delta$  = 1.83 (s, 3H,  $\text{H}_a$ ), 3.76 (s, 3H,  $\text{H}_g$ ), 6.85 (d,  $J$  = 8.2 Hz, 2H,  $\text{H}_f$ ), 6.98 (d,  $J$  = 5.1 Hz, 1H,  $\text{H}_d$ ), 7.17 (d,  $J$  = 5.1 Hz, 1H,  $\text{H}_c$ ), 7.23 (d,  $J$  = 8.2 Hz, 2H,  $\text{H}_e$ ), 8.70-9.70 (br, 1H,  $\text{H}_a$ );  $^{13}\text{C}$  NMR (100 MHz,  $\text{CDCl}_3$ , 295 K):  $\delta$  = 15.1, 55.3, 113.9, 114.0, 125.1, 128.8, 130.0, 130.5, 133.0, 153.4, 159.2; LR-ESIMS:  $m/z$  = 270  $[\text{MNa}]^+$ ; HR-ESIMS:  $m/z$  = 270.0569 (calcd. for  $\text{C}_{13}\text{H}_{13}\text{NO}_2\text{NaS}$ , 270.0565).

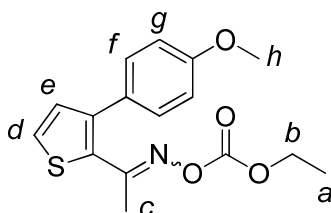

### 2-Acetyl-3-*p*-methoxyphenylthiophene *O*-ethoxycarbonyl oxime – 6b

Prepared from 2-acetyl-3-*p*-methoxyphenylthiophene oxime (0.138 g, 0.56 mmol), ethyl chloroformate (0.05 mL, 0.56 mmol) and pyridine (0.05 mL, 0.56 mmol). Colourless oil (0.140 g, yield = 78%).  $^1\text{H}$  NMR (400 MHz,  $\text{CDCl}_3$ , 295 K):  $\delta$  = 1.36 (t,  $J$  = 7.1 Hz, 3H,  $\text{H}_a$ ), 1.97 (s, 3H,  $\text{H}_c$ ), 3.83 (s, 3H,  $\text{H}_g$ ), 4.34 (q,  $J$  = 7.1 Hz, 2H,  $\text{H}_b$ ), 6.91 (d,  $J$  = 8.7 Hz, 2H,  $\text{H}_g$ ), 7.07 (d,  $J$  = 5.1 Hz, 1H,  $\text{H}_e$ ), 7.28 (d,  $J$  = 8.7 Hz, 2H,  $\text{H}_f$ ), 7.34 (d,  $J$  = 5.1 Hz, 1H,  $\text{H}_d$ );  $^{13}\text{C}$  NMR (100 MHz,  $\text{CDCl}_3$ , 295 K):  $\delta$  = 14.3, 17.0, 55.3, 64.8, 114.0, 126.8, 128.4, 130.0, 130.4, 130.5, 143.2, 153.6, 159.5, 160.4; LR-ESIMS:  $m/z$  = 230  $[\text{M}]^+$ ; HR-ESIMS:  $m/z$  = 342.0770 (calcd. for  $\text{C}_{16}\text{H}_{17}\text{NO}_4\text{Na}$ , 342.0776).

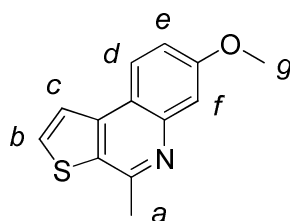

### 7-Methoxy-4-methylthieno[2,3-*c*]quinoline – 7b

Prepared from 2-acetyl-3-*p*-methoxyphenylthiophene *O*-ethoxycarbonyl oxime (0.056 g, 0.17 mmol). Colourless solid (0.025 g, yield = 62%). M.p. = 112 °C (dec.);  $^1\text{H}$  NMR (300 MHz,

CDCl<sub>3</sub>, 296 K):  $\delta$  = 2.92 (s, 3H, H<sub>a</sub>), 3.97 (s, 3H, H<sub>g</sub>), 7.24 (dd,  $J$  = 2.6 Hz, 8.9 Hz, 1H, H<sub>e</sub>), 7.54 (d,  $J$  = 2.6 Hz, 1H, H<sub>f</sub>), 7.78 (d,  $J$  = 5.3 Hz, 1H, H<sub>c</sub>), 7.89 (d,  $J$  = 5.3 Hz, 1H, H<sub>b</sub>), 8.11 (d,  $J$  = 8.9 Hz, 1H, H<sub>d</sub>); <sup>13</sup>C NMR (100 MHz, CDCl<sub>3</sub>, 296 K):  $\delta$  = 30.9, 127.0, 127.2, 128.6, 128.8, 129.3, 129.9, 130.0, 130.2, 134.9, 137.5, 140.6, 166.9; LR-EIMS:  $m/z$  = 229 [M]<sup>+</sup>; HR-ESIMS:  $m/z$  = 229.0554 (calcd. for C<sub>13</sub>H<sub>11</sub>ONS, 229.0556).

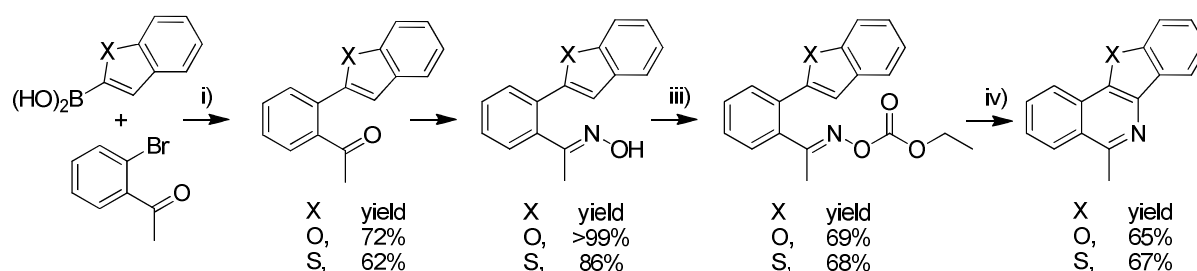

**Scheme S5:** Synthesis of isoquinoline derivatives. Reagents and conditions: i) Pd(PPh<sub>3</sub>)<sub>4</sub>, K<sub>2</sub>CO<sub>3</sub>, toluene, EtOH, reflux, 18 h, Ar; ii) NH<sub>2</sub>OH.HCl, NaOAc, EtOH, reflux, 18 h; iii) EtOCO<sub>2</sub>Cl, pyridine, CH<sub>2</sub>Cl<sub>2</sub>, rt, 18 h; iv) MAP, PhCF<sub>3</sub>, UV irradiation, 3 h.

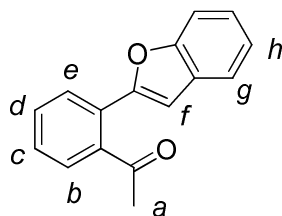

## 2-(Benzofuran-2-yl)acetophenone

Prepared from 2-benzofuranylboronic acid (0.406 g, 2.51 mmol), 2'-acetophenone (0.28 mL, 2.10 mmol), tetrakis(triphenylphosphine) palladium(II) (0.243 g, 0.21 mmol), and potassium carbonate (0.869 g, 6.30 mmol). Colourless oil (0.352 g, yield = 72%). <sup>1</sup>H NMR (400 MHz, CDCl<sub>3</sub>, 296 K):  $\delta$  = 2.34 (s, 3H, H<sub>a</sub>), 6.95 (d,  $J$  = 0.9 Hz, 1H, H<sub>f</sub>), 7.25-7.34 (m, 2H, H<sub>d,j</sub>), 7.44-7.55 (m, 4H, H<sub>c,g,h,i</sub>), 7.61-7.63 (m, 1H, H<sub>e</sub>), 7.74-7.77 (m, 1H, H<sub>b</sub>); <sup>13</sup>C NMR (100 MHz, CDCl<sub>3</sub>, 296 K):  $\delta$  = 30.1, 105.0, 111.4, 121.3, 123.3, 124.8, 127.3, 128.0, 128.5, 128.9, 129.0, 130.4, 140.4, 154.3, 155.2, 204.4; LR-EIMS:  $m/z$  = 236 [M]<sup>+</sup>; HR-ESIMS:  $m/z$  = 236.0834 (calcd. for C<sub>16</sub>H<sub>12</sub>O<sub>2</sub>, 236.0832).



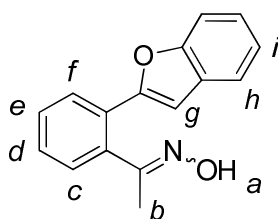

## 2-(Benzofuran-2-yl)acetophenone oxime

Prepared from 2-(benzofuran-2-yl)acetophenone (0.351 g, 1.50 mmol), hydroxylamine hydrochloride (0.207 g, 3.00 mmol) and sodium acetate (0.366 g, 3.00 mmol). Yellow oil (0.389 g, yield >99%).  $^1\text{H}$  NMR (400 MHz,  $\text{CDCl}_3$ , 296 K):  $\delta$  = 2.08 (s, 3H,  $\text{H}_b$ ), 6.87 (d,  $J$  = 0.9 Hz, 1H,  $\text{H}_g$ ), 7.22-7.27 (m, 2H,  $\text{H}_{i,j}$ ), 7.37-7.42 (m, 2H,  $\text{H}_{e,h}$ ), 7.45-7.54 (m, 2H,  $\text{H}_{k,d}$ ), 7.60 (m, 1H,  $\text{H}_f$ ), 7.87 (d,  $J$  = 7.6 Hz, 1H,  $\text{H}_c$ );  $^{13}\text{C}$  NMR (100 MHz,  $\text{CDCl}_3$ , 296 K):  $\delta$  = 15.8, 105.4, 111.3, 121.2, 123.0, 124.6, 126.1, 128.3, 128.5, 128.7, 129.0, 129.0, 129.5, 136.0, 154.3, 154.8; LR-ESIMS:  $m/z$  = 274  $[\text{MNa}]^+$ ; HR-ESIMS:  $m/z$  = 274.0848 (calcd. for  $\text{C}_{16}\text{H}_{13}\text{NO}_2\text{Na}$ , 274.0844).

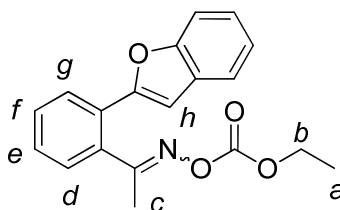

## 2-(Benzofuran-2-yl)acetophenone *O*-ethylcarbonyl oxime – 8a

Prepared from 2-(benzofuran-2-yl)acetophenone oxime (0.374 g, 1.50 mmol), ethyl chloroformate (0.12 mL, 1.50 mmol) and pyridine (0.14 mL, 1.50 mmol). Colourless oil (0.333 g, yield = 69%).  $^1\text{H}$  NMR (400 MHz,  $\text{CDCl}_3$ , 295 K):  $\delta$  = 1.42 (t,  $J$  = 7.1 Hz, 3H,  $\text{H}_a$ ), 2.18 (s, 3H,  $\text{H}_c$ ), 4.39 (q,  $J$  = 7.1 Hz, 2H,  $\text{H}_b$ ), 6.92 (s, 1H,  $\text{H}_h$ ), 7.24-7.28 (m, 1H,  $\text{H}_f$ ), 7.32 (dd,  $J$  1.3 Hz, 7.3 Hz, 1H,  $\text{H}_e$ ), 7.40-7.55 (m, 4H,  $\text{H}_{ArH}$ ), 7.61 (dd,  $J$  = 1.1 Hz, 7.7 Hz, 1H,  $\text{H}_g$ ), 7.86 (dd,  $J$  = 1.0 Hz, 7.7 Hz, 1H,  $\text{H}_d$ );  $^{13}\text{C}$  NMR (100 MHz,  $\text{CDCl}_3$ , 295 K):  $\delta$  = 14.8, 18.4, 65.2, 106.1, 111.7, 121.7, 123.5, 125.2, 127.4, 128.7, 129.0, 129.2, 129.3, 130.2, 130.3, 134.4, 154.2, 155.3, 166.6; LR-EIMS:  $m/z$  = 278  $[\text{M}]^+$ .

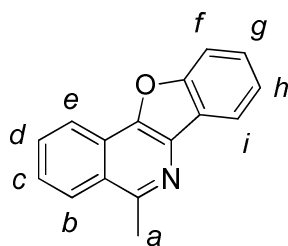

### 5-Methylbenzofuro[3,2-c]isoquinoline – 9a

Prepared from 2-(benzofuran-2-yl)acetophenone *O*-ethoxycarbonyl oxime (0.028 g, 0.087 mmol). Colourless oil (0.013 g, yield = 65%).  $^1\text{H}$  NMR (400 MHz,  $\text{CDCl}_3$ , 295 K):  $\delta$  = 3.12 (s, 3H,  $\text{H}_a$ ), 7.46 (m, 1H,  $\text{H}_c$ ), 7.53 (m, 1H,  $\text{H}_d$ ), 7.66-7.72 (m, 2H,  $\text{H}_{e,g}$ ), 7.85 (m, 1H,  $\text{H}_h$ ), 8.26-8.29 (m, 2H,  $\text{H}_{b,f}$ ), 8.40 (d,  $J$  = 8.0 Hz, 1H,  $\text{H}_i$ );  $^{13}\text{C}$  NMR (100 MHz,  $\text{CDCl}_3$ , 296 K):  $\delta$  = 22.8, 112.0, 120.3, 120.6, 123.4, 123.5, 124.2, 126.7, 126.9, 127.1, 129.8, 130.5, 155.1, 156.2, 169.6, 190.3; LR-EIMS:  $m/z$  = 233  $[\text{M}]^+$ ; HR-ESIMS:  $m/z$  = 233.0836 (calcd. for  $\text{C}_{16}\text{H}_{11}\text{ON}$ , 233.0835).

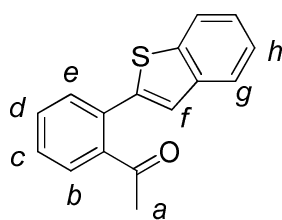

### 2-(Benzothiophen-2-yl)acetophenone

Prepared from benzo[*b*]thiophene-2-boronic acid (0.400 g, 2.25 mmol), 2'-bromoacetophenone (0.25 mL, 1.87 mmol), tetrakis(triphenylphosphine) palladium(II) (0.216 g, 0.19 mmol) and potassium carbonate (0.776 g, 5.61 mmol). Colourless oil (0.293 g, yield = 62%).  $^1\text{H}$  NMR (400 MHz,  $\text{CDCl}_3$ , 296 K):  $\delta$  = 2.22 (s, 3H,  $\text{H}_a$ ), 7.22 (d,  $J$  = 0.6 Hz, 1H,  $\text{H}_f$ ), 7.34-7.42 (m, 2H,  $\text{H}_{c,d}$ ), 7.43-7.59 (m, 4H,  $\text{H}_{g,h,i,j}$ ), 7.77-7.80 (m, 1H,  $\text{H}_e$ ), 7.85-7.87 (m, 1H,  $\text{H}_b$ );  $^{13}\text{C}$  NMR (100 MHz,  $\text{CDCl}_3$ , 296 K):  $\delta$  = 30.4, 122.2, 123.9, 124.4, 124.8, 127.6, 128.3, 128.6, 130.6, 130.8, 132.3, 133.1, 140.2, 140.5, 141.7, 204.8; LR-EIMS:  $m/z$  = 252  $[\text{M}]^+$ ; HR-ESIMS:  $m/z$  = 252.0605 (calcd. for  $\text{C}_{16}\text{H}_{12}\text{OS}$ , 252.0603).

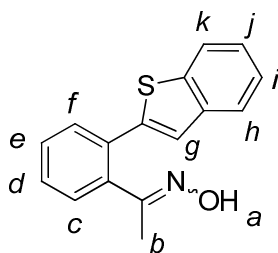

### 2-(Benzothiophen-2-yl)acetophenone oxime

Prepared from 2-(benzothiophen-2-yl)acetophenone (0.283 g, 1.10 mmol), hydroxylamine hydrochloride (0.156 g, 2.20 mmol) and sodium acetate (0.184 g, 2.20 mmol). Colourless oil (0.325 g, yield = 86%). Two isomers 1:3.25.  $^1\text{H}$  NMR (400 MHz,  $\text{CDCl}_3$ , 296 K):  $\delta$  = 1.94/1.98 (s, 3H,  $\text{H}_b$ ), 7.31 (d,  $J$  = 05 Hz, 1H,  $\text{H}_g$ ), 7.32-7.48 (m, 4H,  $\text{H}_{d,e,i,j}$ ), 7.59 (d,  $J$  = 7.4 Hz, 1H,  $\text{H}_f$ ), 7.64 (m, 1H,  $\text{H}_c$ ), 7.79 (dd,  $J$  = 1.7 Hz, 6.9 Hz, 1H,  $\text{H}_k$ ), 7.84 (dd, 1.4 Hz, 7.9 Hz, 1H,  $\text{H}_h$ ), 7.94-8.19 (br, 1H,  $\text{H}_a$ );  $^{13}\text{C}$  NMR (100 MHz,  $\text{CDCl}_3$ , 296 K):  $\delta$  = 15.9, 122.2, 124.4, 124.5, 126.0, 128.4, 128.5, 129.1, 129.5, 130.8, 133.1, 137.2, 140.2, 140.4, 142.3, 159.2; LR-ESIMS:  $m/z$  = 290.3  $[\text{MNa}]^+$ ; HR-ESIMS:  $m/z$  = 290.0608 (calcd. for  $\text{C}_{16}\text{H}_{13}\text{NONaS}$ , 290.0616).

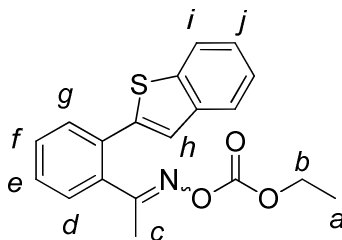

### 2-(Benzothiophen-2-yl)acetophenone *O*-ethoxycarbonyl oxime – 8b

Prepared from 2-(benzothiophen-2-yl)acetophenone oxime (0.306 g, 1.15 mmol), ethyl chloroformate (0.11 mL, 1.15 mmol) and pyridine (0.09 mL, 1.15 mmol). Colourless oil (0.267 g, yield = 68%). Two isomers 1:1.3.  $^1\text{H}$  NMR (400 MHz,  $\text{CDCl}_3$ , 296 K):  $\delta$  = 1.39/1.40 (t,  $J$  = 7.1 Hz, 3H,  $\text{H}_a$ ), 2.01/2.40 (s, 3H,  $\text{H}_c$ ), 4.36/4.38 (q,  $J$  = 7.1 Hz, 2H,  $\text{H}_b$ ), 7.32 (d,  $J$  = 0.5 Hz, 1H,  $\text{H}_h$ ), 7.34-7.44 (m, 3H,  $\text{H}_{e,j,k}$ ), 7.47-7.52 (m, 1H,  $\text{H}_f$ ), 7.59 (dd,  $J$  = 1.2 Hz, 7.7 Hz, 1H,  $\text{H}_g$ ), 7.74 (dd,  $J$  = 1.4 Hz, 8.0 Hz, 1H,  $\text{H}_d$ ), 7.79 (d,  $J$  = 6.6 Hz, 1H,  $\text{H}_l$ ), 7.84

(dd,  $J = 0.5$  Hz, 7.1 Hz, 1H,  $H_i$ );  $^{13}\text{C}$  NMR (100 MHz,  $\text{CDCl}_3$ , 296 K):  $\delta = 14.3, 17.9, 64.8, 122.2, 123.9, 124.3, 124.6, 124.6, 127.0, 128.6, 129.9, 130.8, 133.2, 135.4, 140.2, 140.4, 141.6, 153.9, 166.3$ ; LR-ESIMS:  $m/z = 362$  [ $\text{MNa}$ ] $^+$ ; HR-ESIMS:  $m/z = 362.0838$  (calcd. for  $\text{C}_{19}\text{H}_{17}\text{NO}_3\text{NaS}$ , 362.0827).

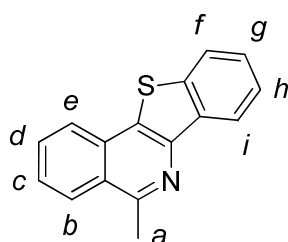

### 5-Methylbenzo[4,5]thieno[3,2-c]isoquinoline – 9b

Prepared from 2-(benzothiophen-2-yl)acetophenone *O*-ethoxycarbonyl oxime (0.051 g, 0.15 mmol). Colourless oil (0.025 g, yield = 67%).  $^1\text{H}$  NMR (400 MHz,  $\text{CDCl}_3$ , 296 K):  $\delta = 3.13$ (s, 3H,  $H_a$ ), 7.51-7.58 (m, 2H,  $H_{c,d}$ ), 7.65-7.70 (m, 1H,  $H_h$ ), 7.79-7.83 (m, 1H,  $H_g$ ), 7.94 (d,  $J = 7.1$  Hz, 1H,  $H_e$ ), 8.09 (d,  $J = 8.2$  Hz, 1H,  $H_f$ ), 8.27 (d,  $J = 8.4$  Hz, 1H,  $H_i$ ), 8.54 (d,  $J = 7.1$  Hz, 1H,  $H_b$ );  $^{13}\text{C}$  NMR (125 MHz,  $\text{CDCl}_3$ , 294 K):  $\delta = 22.7, 122.7, 122.8, 124.2, 124.9, 126.0$  ( $\times 2$ ), 127.0, 127.1 ( $\times 2$ ), 128.1, 130.5, 130.6, 131.7, 156.5 ( $\times 2$ ).

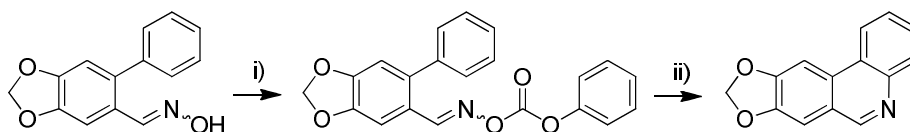

**Scheme S6:** Synthesis of trispheridine from 6-phenylbenzo[*d*][1,3]dioxole-5-carbaldehyde oxime.<sup>2</sup> Reagents and conditions: i)  $\text{PhOCO}_2\text{Cl}$ , pyridine,  $\text{CH}_2\text{Cl}_2$ , rt, 18 h, 66%; ii) MAP, *t*-BuOH, UV irradiation, 3 h, 49%.

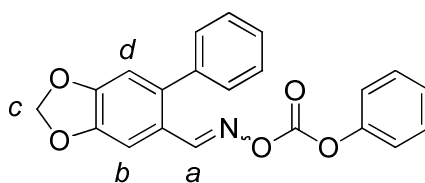

### 6-Phenylbenzo[*d*][1,3]dioxole-5-carbaldehyde *O*-phenoxy carbonyl oxime – 10

Prepared from 6-phenylbenzo[*d*][1,3]dioxole-5-carbaldehyde oxime<sup>2</sup> (0.257 g, 1.07 mmol), phenyl chloroformate (0.13 mL, 1.07 mmol) and pyridine (0.08 mL, 1.07 mmol). Colourless solid (0.254 g, yield = 66%). M.p. = 115-117 °C; <sup>1</sup>H NMR (400 MHz, CDCl<sub>3</sub>, 295 K):  $\delta$  = 6.07 (s, 2H, H<sub>c</sub>), 6.83 (s, 1H, H<sub>d</sub>), 7.22-7.29 (m, 5H, H<sub>ArH</sub>), 7.37-7.47 (m, 5H, H<sub>ArH</sub>), 7.62 (s, 1H, H<sub>b</sub>), 8.29 (s, 1H, H<sub>a</sub>); <sup>13</sup>C NMR (100 MHz, CDCl<sub>3</sub>, 295 K):  $\delta$  = 53.9, 102.4, 106.5, 110.5, 121.4, 126.7, 128.4, 129.0, 130.0, 130.2, 139.0, 140.4, 148.0, 151.0, 151.3, 152.6, 155.9; LR-ESIMS:  $m/z$  = 384 [MNa]<sup>+</sup>; HR-ESIMS:  $m/z$  = 384.0859 (calcd. for C<sub>21</sub>H<sub>15</sub>NO<sub>5</sub>Na, 384.0848).

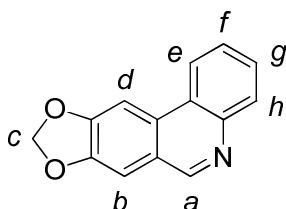

### Trispheridine - 11

Prepared from 6-phenylbenzo[*d*][1,3]dioxole-5-carbaldehyde *O*-phenoxy carbonyl oxime (0.049 mg, 0.136 mmol). Colourless solid (0.015 g, yield = 49%). <sup>1</sup>H and <sup>13</sup>C NMR spectra were consistent with those reported in the literature.<sup>2</sup> M.p. = 130-132 °C; <sup>1</sup>H NMR (400 MHz, CDCl<sub>3</sub>, 295 K):  $\delta$  = 6.17 (s, 2H, H<sub>c</sub>), 7.34 (s, 1H, H<sub>d</sub>), 7.61-7.71 (m, 2H, H<sub>f,g</sub>), 7.92 (s, 1H, H<sub>b</sub>), 8.14 (dd,  $J$  = 1.1 Hz, 8.2 Hz, 1H, H<sub>e</sub>), 8.38 (dd,  $J$  = 1.2 Hz, 8.1 Hz, 1H, H<sub>h</sub>), 9.09 (s, 1H, H<sub>a</sub>); <sup>13</sup>C NMR (100 MHz, CDCl<sub>3</sub>, 298 K):  $\delta$  = 100.0, 101.9, 105.5, 122.0, 123.1, 124.3, 126.7, 128.0, 130.1, 130.3, 144.1, 148.2, 151.5, 151.8.

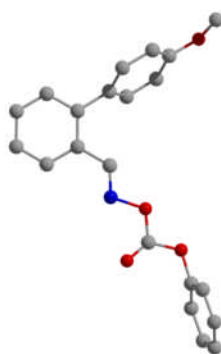

**Figure S1:** The X-ray crystal structure of **1b**.

**Table S2:** Crystal data and structure refinement for **1b**.

|                                   |                                                 |                       |
|-----------------------------------|-------------------------------------------------|-----------------------|
| Identification code               | <b>1b</b>                                       |                       |
| Empirical formula                 | C <sub>21</sub> H <sub>17</sub> NO <sub>4</sub> |                       |
| Formula weight                    | 347.36                                          |                       |
| Temperature                       | 93(2) K                                         |                       |
| Wavelength                        | 0.71073 Å                                       |                       |
| Crystal system                    | Orthorhombic                                    |                       |
| Space group                       | P2(1)2(1)2(1)                                   |                       |
| Unit cell dimensions              | a = 8.5885(19) Å                                | $\alpha = 90^\circ$ . |
|                                   | b = 13.388(3) Å                                 | $\beta = 90^\circ$ .  |
|                                   | c = 15.162(4) Å                                 | $\gamma = 90^\circ$ . |
| Volume                            | 1743.4(7) Å <sup>3</sup>                        |                       |
| Z                                 | 4                                               |                       |
| Density (calculated)              | 1.323 Mg/m <sup>3</sup>                         |                       |
| Absorption coefficient            | 0.092 mm <sup>-1</sup>                          |                       |
| F(000)                            | 728                                             |                       |
| Crystal size                      | 0.20 x 0.20 x 0.10 mm <sup>3</sup>              |                       |
| Theta range for data collection   | 2.03 to 25.33°.                                 |                       |
| Index ranges                      | -8 ≤ h ≤ 10, -16 ≤ k ≤ 13, -17 ≤ l ≤ 18         |                       |
| Reflections collected             | 11104                                           |                       |
| Independent reflections           | 3181 [R(int) = 0.0433]                          |                       |
| Completeness to theta = 25.00°    | 99.9 %                                          |                       |
| Absorption correction             | Multiscan                                       |                       |
| Max. and min. transmission        | 1.000 and 0.851                                 |                       |
| Refinement method                 | Full-matrix least-squares on F <sup>2</sup>     |                       |
| Data / restraints / parameters    | 3181 / 0 / 236                                  |                       |
| Goodness-of-fit on F <sup>2</sup> | 0.987                                           |                       |
| Final R indices [I > 2σ(I)]       | R1 = 0.0373, wR2 = 0.0751                       |                       |
| R indices (all data)              | R1 = 0.0441, wR2 = 0.0795                       |                       |
| Absolute structure parameter      | 0.0(9)                                          |                       |
| Largest diff. peak and hole       | 0.147 and -0.182 e.Å <sup>-3</sup>              |                       |

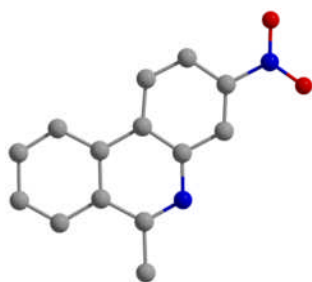

**Figure S2:** The X-ray crystal structure of **5d**.

**Table S3:** Crystal data and structure refinement for **5d**.

|                                   |                                                               |                |
|-----------------------------------|---------------------------------------------------------------|----------------|
| Identification code               | <b>5d</b>                                                     |                |
| Empirical formula                 | C <sub>14</sub> H <sub>10</sub> N <sub>2</sub> O <sub>2</sub> |                |
| Formula weight                    | 238.24                                                        |                |
| Temperature                       | 173(2) K                                                      |                |
| Wavelength                        | 1.54178 Å                                                     |                |
| Crystal system                    | Monoclinic                                                    |                |
| Space group                       | P2(1)/n                                                       |                |
| Unit cell dimensions              | a = 4.469(3) Å                                                | α = 90°.       |
|                                   | b = 13.268(10) Å                                              | β = 96.36(2)°. |
|                                   | c = 18.459(16) Å                                              | γ = 90°.       |
| Volume                            | 1087.8(15) Å <sup>3</sup>                                     |                |
| Z                                 | 4                                                             |                |
| Density (calculated)              | 1.455 Mg/m <sup>3</sup>                                       |                |
| Absorption coefficient            | 0.816 mm <sup>-1</sup>                                        |                |
| F(000)                            | 496                                                           |                |
| Crystal size                      | 0.10 x 0.03 x 0.03 mm <sup>3</sup>                            |                |
| Theta range for data collection   | 4.11 to 68.25°.                                               |                |
| Index ranges                      | -5 ≤ h ≤ 5, -15 ≤ k ≤ 15, -22 ≤ l ≤ 22                        |                |
| Reflections collected             | 13762                                                         |                |
| Independent reflections           | 1978 [R(int) = 0.1630]                                        |                |
| Completeness to theta = 67.00°    | 99.7 %                                                        |                |
| Absorption correction             | Multiscan                                                     |                |
| Max. and min. transmission        | 1.000 and 0.516                                               |                |
| Refinement method                 | Full-matrix least-squares on F <sup>2</sup>                   |                |
| Data / restraints / parameters    | 1978 / 0 / 165                                                |                |
| Goodness-of-fit on F <sup>2</sup> | 1.244                                                         |                |
| Final R indices [I > 2σ(I)]       | R1 = 0.1223, wR2 = 0.3345                                     |                |
| R indices (all data)              | R1 = 0.1570, wR2 = 0.3712                                     |                |
| Extinction coefficient            | 0.028(9)                                                      |                |
| Largest diff. peak and hole       | 0.382 and -0.384 e.Å <sup>-3</sup>                            |                |

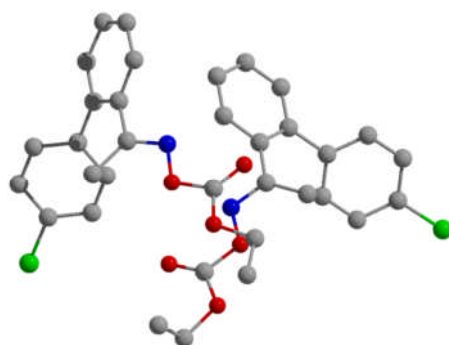

**Figure S3:** The X-ray crystal structure of **4f**.

**Table S4:** Crystal data and structure refinement for **4f**.

|                                   |                                                   |                  |
|-----------------------------------|---------------------------------------------------|------------------|
| Identification code               | <b>4f</b>                                         |                  |
| Empirical formula                 | C <sub>17</sub> H <sub>16</sub> ClNO <sub>3</sub> |                  |
| Formula weight                    | 317.76                                            |                  |
| Temperature                       | 173(2) K                                          |                  |
| Wavelength                        | 1.54178 Å                                         |                  |
| Crystal system                    | Monoclinic                                        |                  |
| Space group                       | C2                                                |                  |
| Unit cell dimensions              | a = 24.039(14) Å                                  | α = 90°.         |
|                                   | b = 7.017(5) Å                                    | β = 95.759(14)°. |
|                                   | c = 19.280(12) Å                                  | γ = 90°.         |
| Volume                            | 3236(4) Å <sup>3</sup>                            |                  |
| Z                                 | 8                                                 |                  |
| Density (calculated)              | 1.305 Mg/m <sup>3</sup>                           |                  |
| Absorption coefficient            | 2.191 mm <sup>-1</sup>                            |                  |
| F(000)                            | 1328                                              |                  |
| Crystal size                      | 0.12 x 0.02 x 0.02 mm <sup>3</sup>                |                  |
| Theta range for data collection   | 2.30 to 68.08°.                                   |                  |
| Index ranges                      | -28 ≤ h ≤ 28, -8 ≤ k ≤ 8, -22 ≤ l ≤ 22            |                  |
| Reflections collected             | 20550                                             |                  |
| Independent reflections           | 5616 [R(int) = 0.2075]                            |                  |
| Completeness to theta = 67.00°    | 99.6 %                                            |                  |
| Absorption correction             | Multiscan                                         |                  |
| Max. and min. transmission        | 1.000 and 0.756                                   |                  |
| Refinement method                 | Full-matrix least-squares on F <sup>2</sup>       |                  |
| Data / restraints / parameters    | 5616 / 1 / 400                                    |                  |
| Goodness-of-fit on F <sup>2</sup> | 1.203                                             |                  |
| Final R indices [I > 2σ(I)]       | R1 = 0.1423, wR2 = 0.3619                         |                  |
| R indices (all data)              | R1 = 0.1656, wR2 = 0.3976                         |                  |
| Absolute structure parameter      | 0.09(5)                                           |                  |
| Extinction coefficient            | 0.0053(8)                                         |                  |
| Largest diff. peak and hole       | 0.723 and -0.600 e.Å <sup>-3</sup>                |                  |



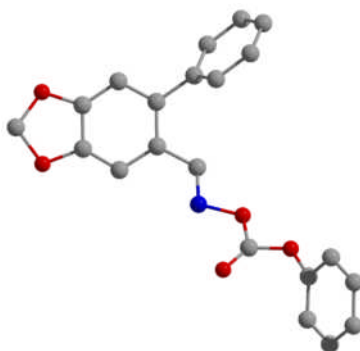

**Figure S4:** The X-ray crystal structure of **10**.

**Table S5:** Crystal data and structure refinement for **10**.

|                                   |                                                 |                  |
|-----------------------------------|-------------------------------------------------|------------------|
| Identification code               | <b>10</b>                                       |                  |
| Empirical formula                 | C <sub>21</sub> H <sub>15</sub> NO <sub>5</sub> |                  |
| Formula weight                    | 361.34                                          |                  |
| Temperature                       | 93(2) K                                         |                  |
| Wavelength                        | 0.71073 Å                                       |                  |
| Crystal system                    | Triclinic                                       |                  |
| Space group                       | P-1                                             |                  |
| Unit cell dimensions              | a = 9.119(8) Å                                  | α = 97.856(18)°. |
|                                   | b = 9.581(7) Å                                  | β = 96.761(13)°. |
|                                   | c = 10.232(8) Å                                 | γ = 104.70(2)°.  |
| Volume                            | 845.7(12) Å <sup>3</sup>                        |                  |
| Z                                 | 2                                               |                  |
| Density (calculated)              | 1.419 Mg/m <sup>3</sup>                         |                  |
| Absorption coefficient            | 0.102 mm <sup>-1</sup>                          |                  |
| F(000)                            | 376                                             |                  |
| Crystal size                      | 0.10 x 0.10 x 0.10 mm <sup>3</sup>              |                  |
| Theta range for data collection   | 2.23 to 25.32°.                                 |                  |
| Index ranges                      | -10 ≤ h ≤ 10, -9 ≤ k ≤ 11, -12 ≤ l ≤ 10         |                  |
| Reflections collected             | 5292                                            |                  |
| Independent reflections           | 2969 [R(int) = 0.0681]                          |                  |
| Completeness to theta = 25.00°    | 96.8 %                                          |                  |
| Absorption correction             | Multiscan                                       |                  |
| Max. and min. transmission        | 1.000 and 0.8540                                |                  |
| Refinement method                 | Full-matrix least-squares on F <sup>2</sup>     |                  |
| Data / restraints / parameters    | 2969 / 0 / 244                                  |                  |
| Goodness-of-fit on F <sup>2</sup> | 1.067                                           |                  |
| Final R indices [I > 2σ(I)]       | R1 = 0.0783, wR2 = 0.1996                       |                  |
| R indices (all data)              | R1 = 0.0858, wR2 = 0.2115                       |                  |
| Largest diff. peak and hole       | 0.633 and -0.543 e.Å <sup>-3</sup>              |                  |

## References

1. F. Portela-Cubillo, J. S. Scott and J. C. Walton, *J. Org Chem.* 2008, **73**, 5558.
2. F. Portela-Cubillo, J. Lymer, E. M. Scanlan, J. S. Scott and J. C. Walton, *Tetrahedron*, 2008, **64**, 11908.
3. S. C. Pelly, C. J. Parkinson, W. A. L. van Otterlo and C. B. de Koning, *J. Org. Chem.*, 2005, **70**, 10474.
4. P. Anbarasan, H. Neumann and M. Beller, *Chem. Eur. J.*, 2010, **16**, 4725.
5. J. Goossen, N. Rodríguez and C. Linder *J. Am. Chem. Soc.*, 2008, **130**, 15248.
6. B. H. Lipshutz, T. Butler and E. Swift, *Org. Lett.*, 2008, **10**, 697.

## $^1\text{H}$ and $^{13}\text{C}$ NMR spectra of novel compounds

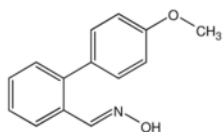

4'-Methoxybiphenyl-2-carbaldehyde oxime

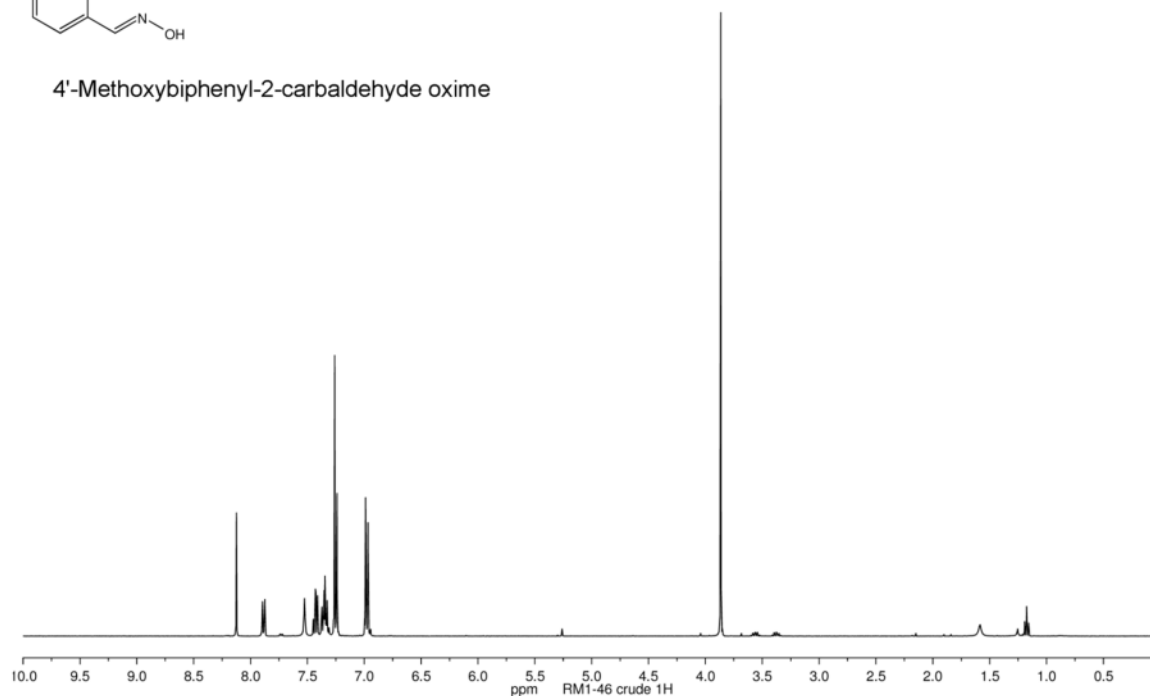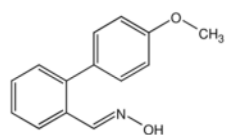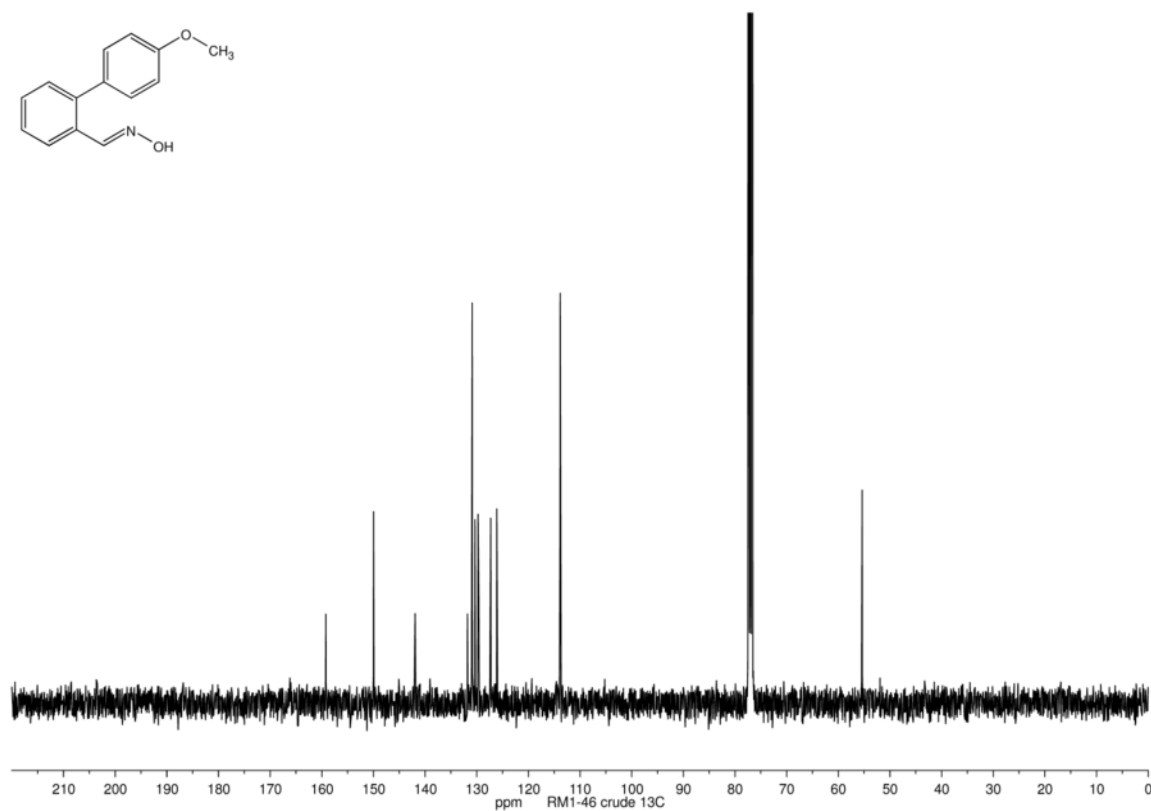

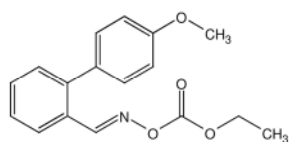

4'-Methoxybiphenyl-2-carbaldehyde O-ethoxycarbonyl oxime - 1a

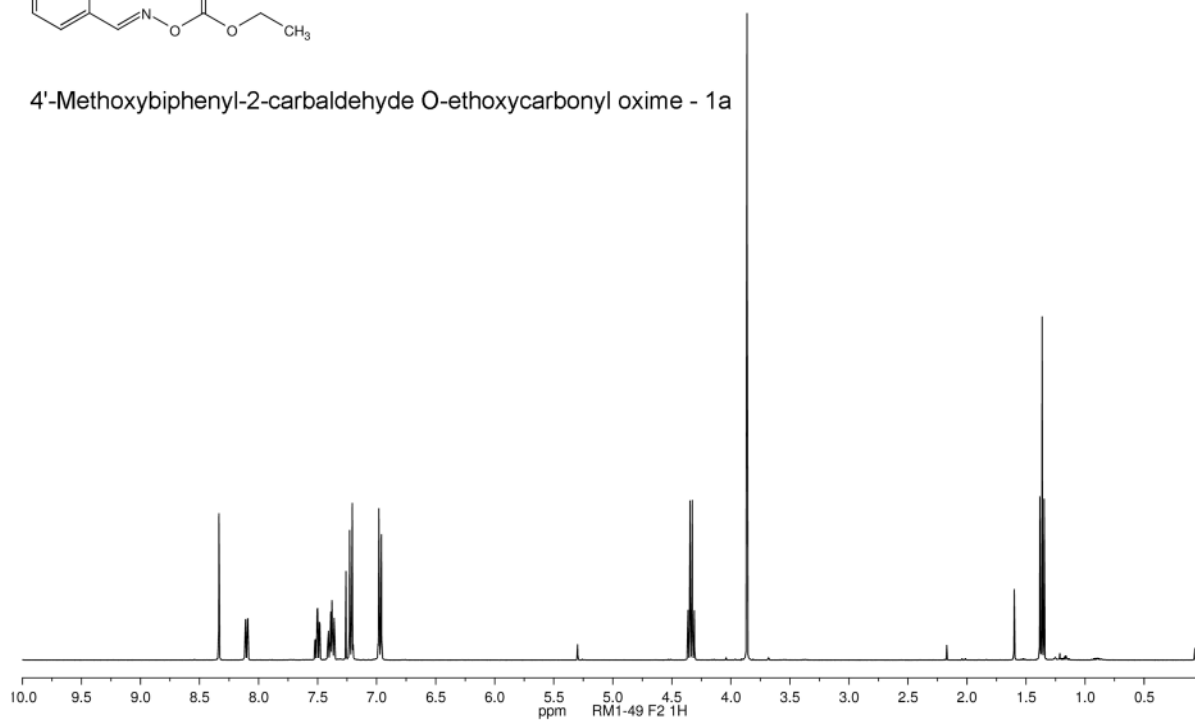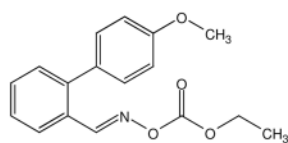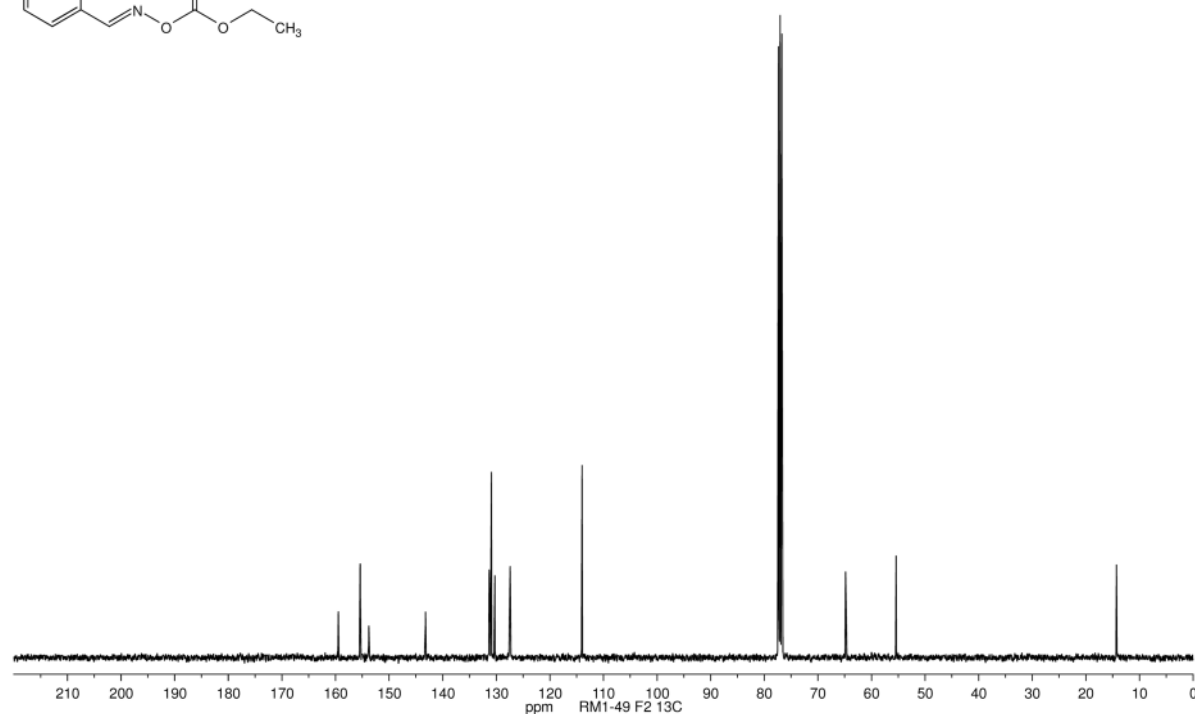

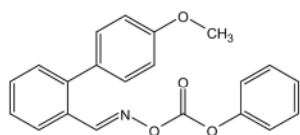

4'-Methoxybiphenyl-2-carbaldehyde O-phenoxy carbonyl oxime

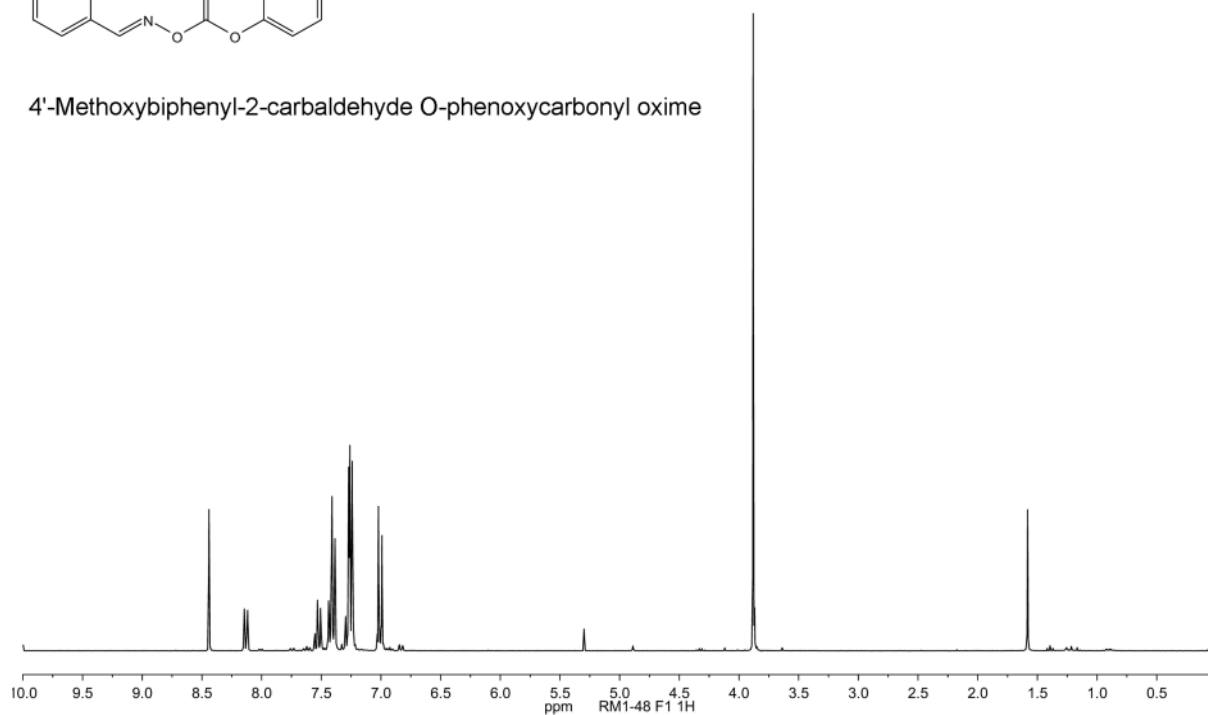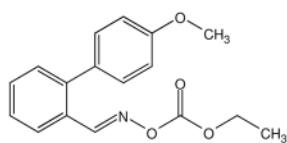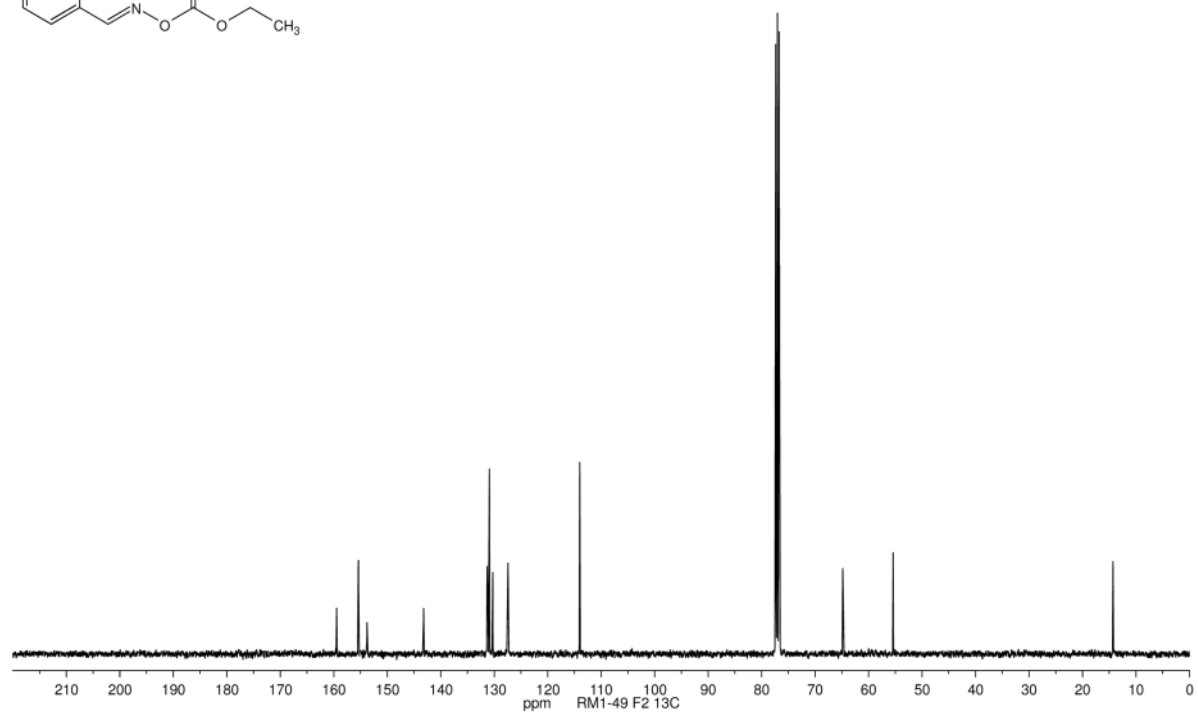

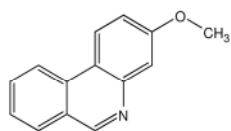

3-Methoxyphenanthridine - 2

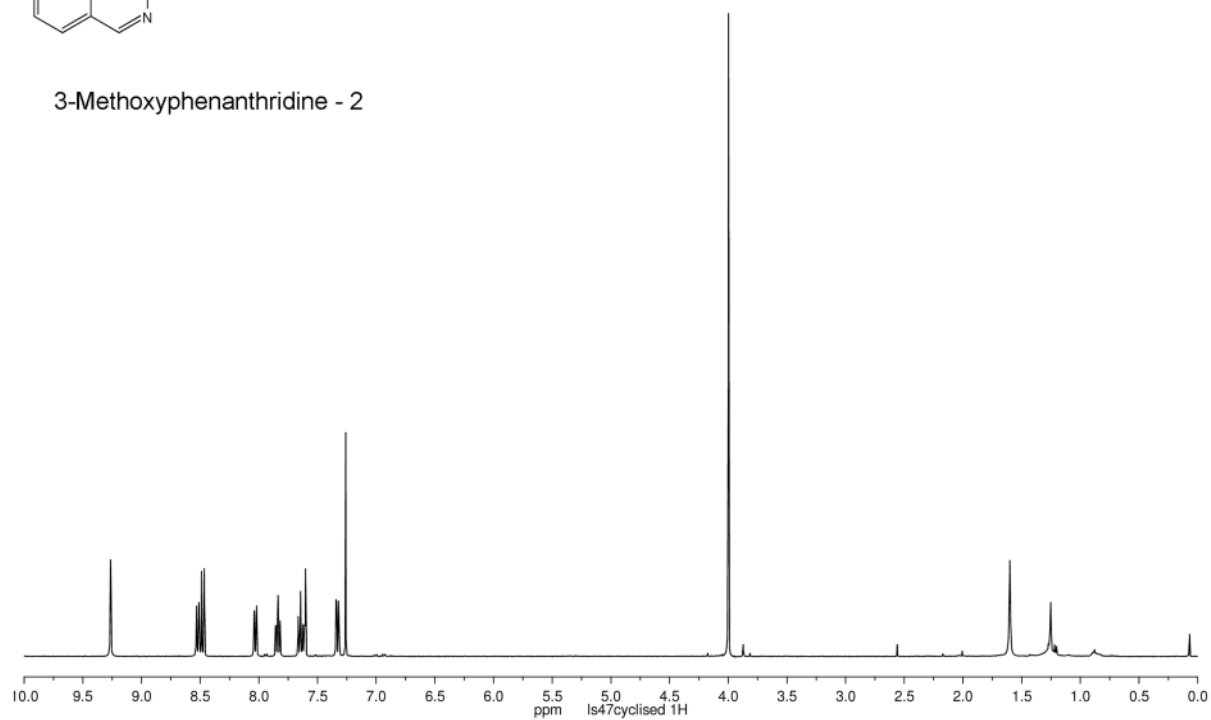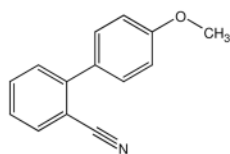

4'-methoxybiphenyl-2-carbonitrile - 3

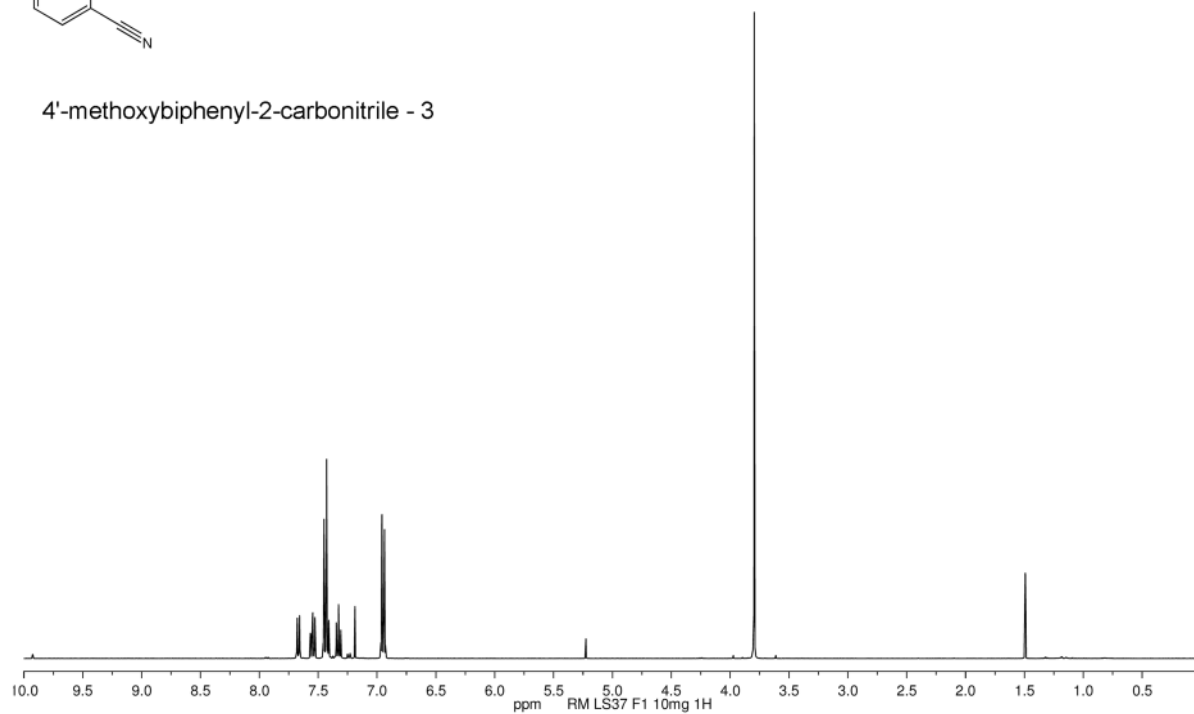

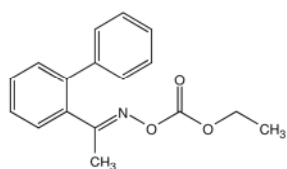

2-Acetyl-biphenyl O-ethoxycarbonyl oxime - 4a

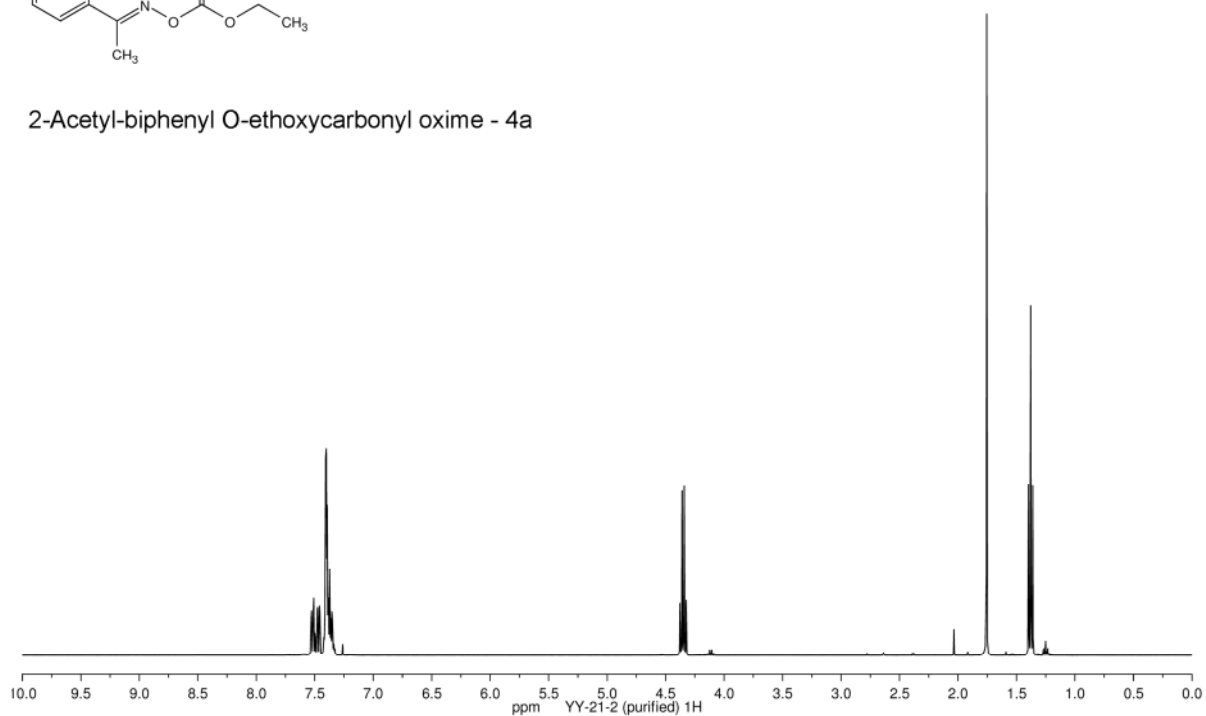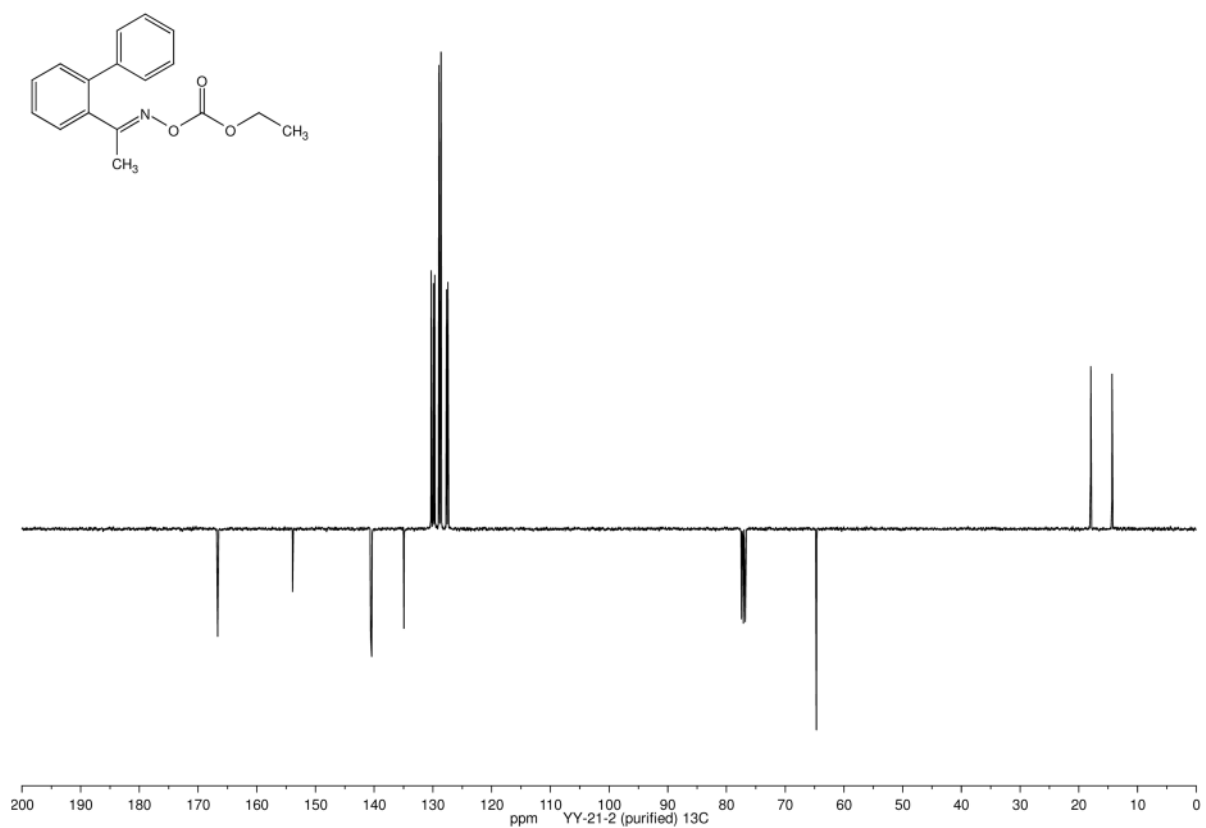

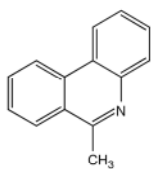

6-Methylphenanthridine - 5a

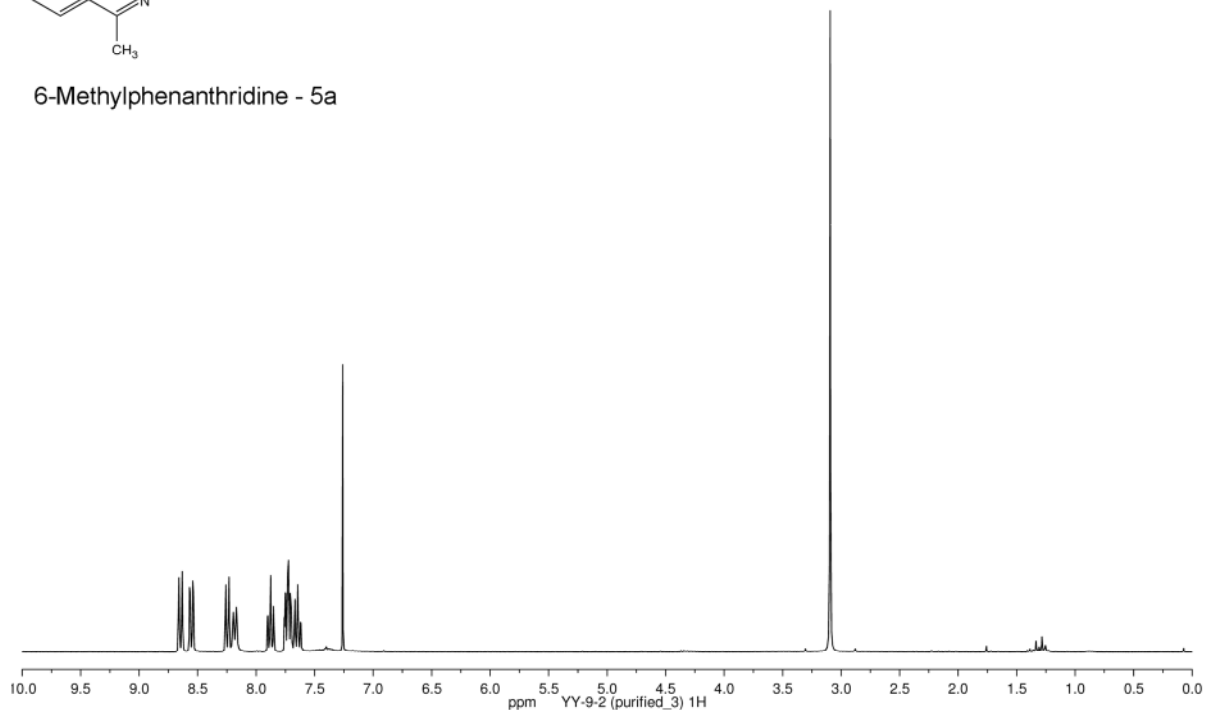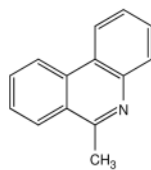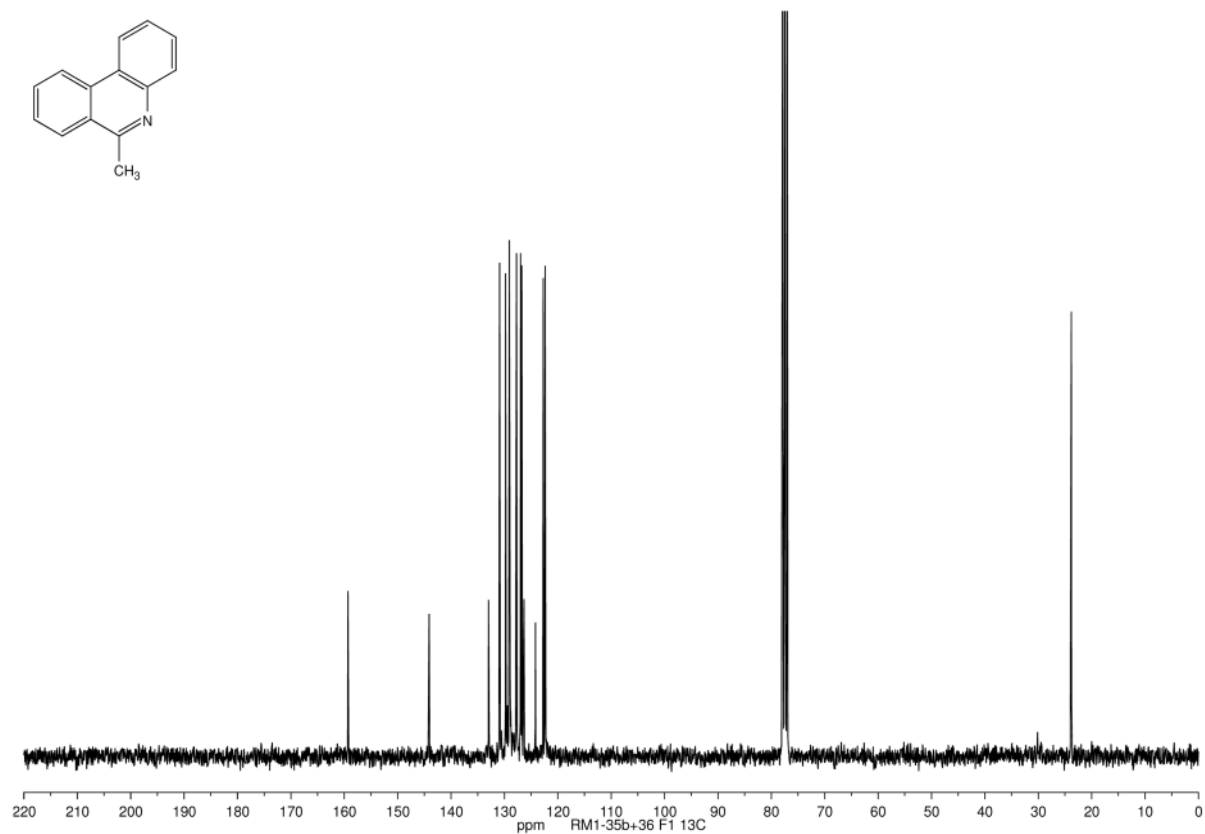



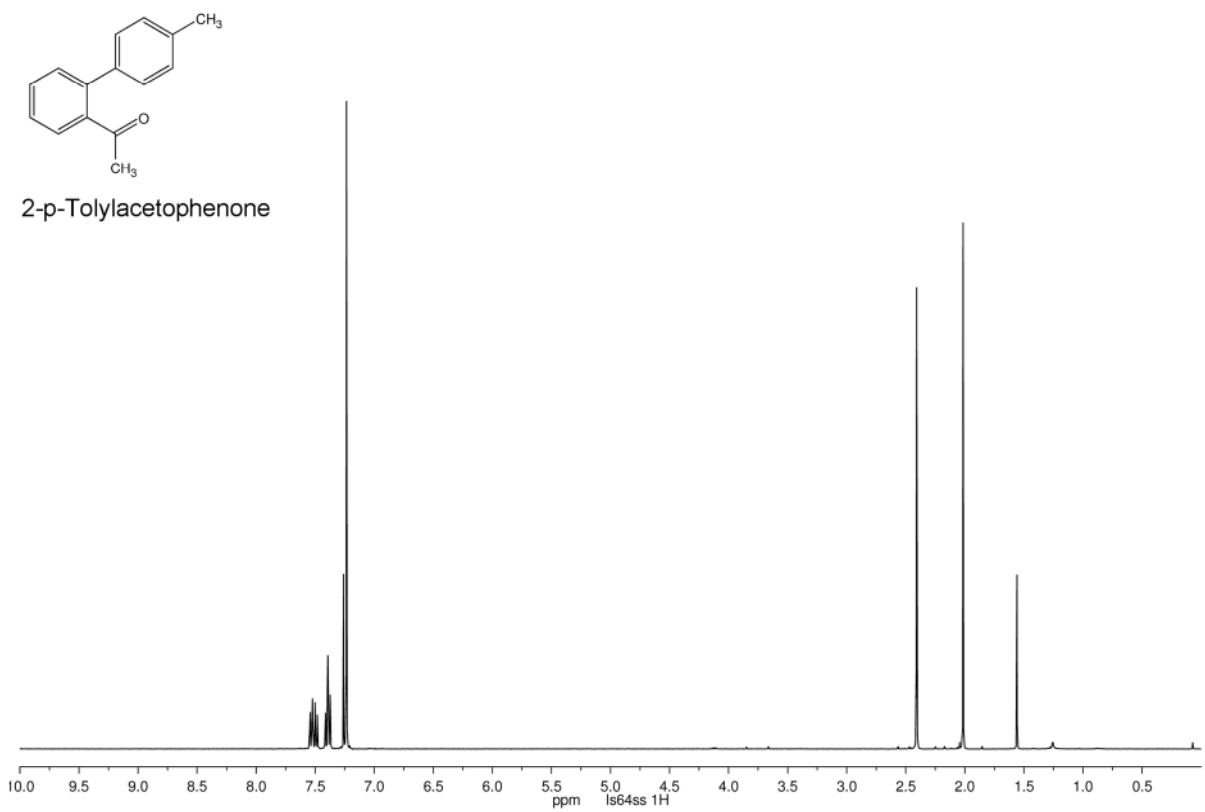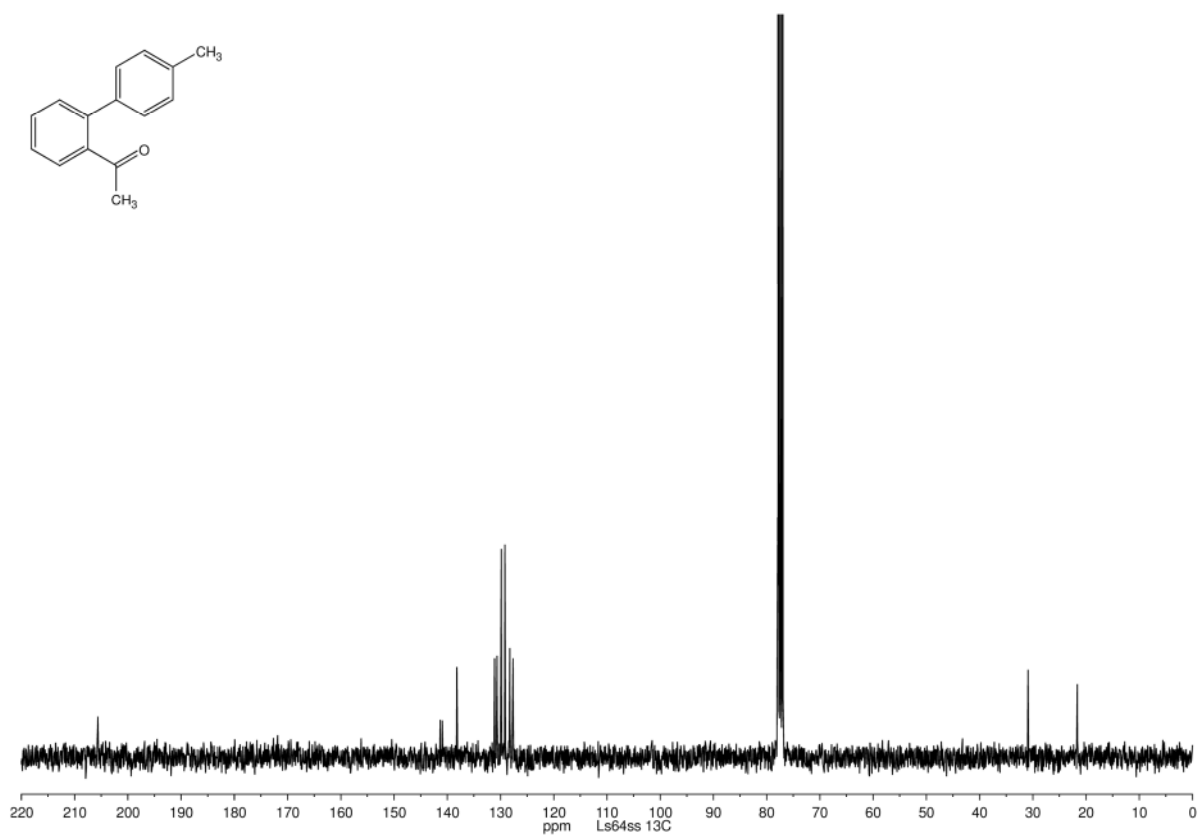

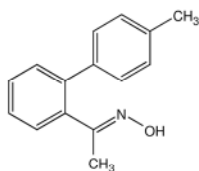

2-p-Tolylacetophenone oxime

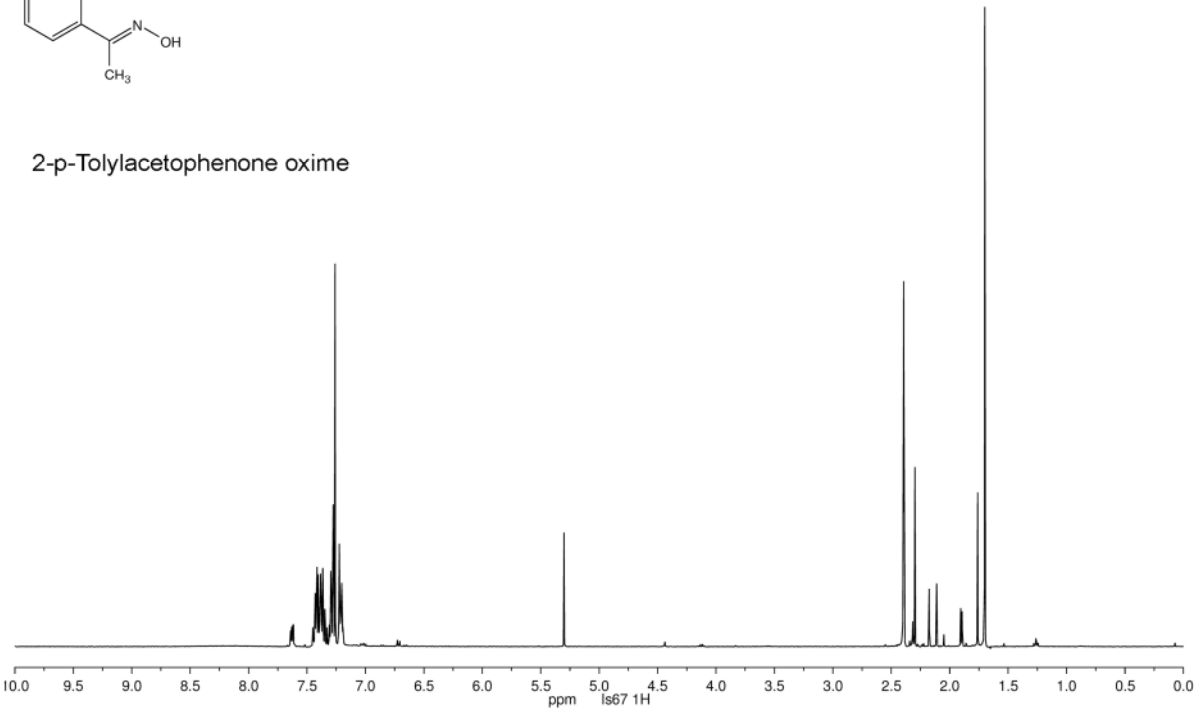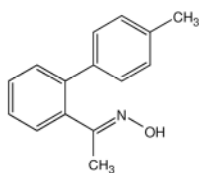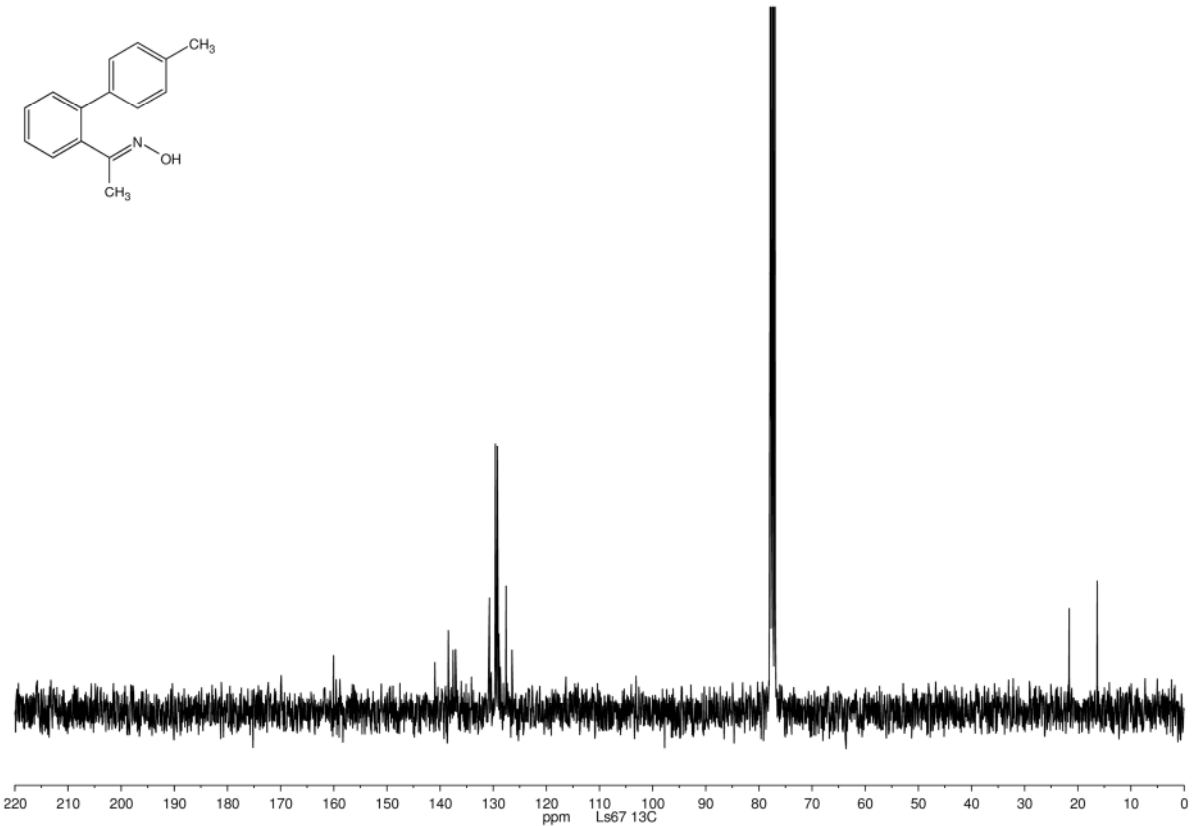

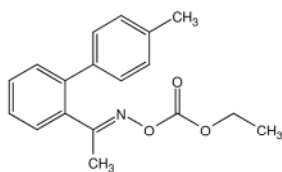

2-p-Tolylacetophenone O-ethoxycarbonyl oxime - 4b

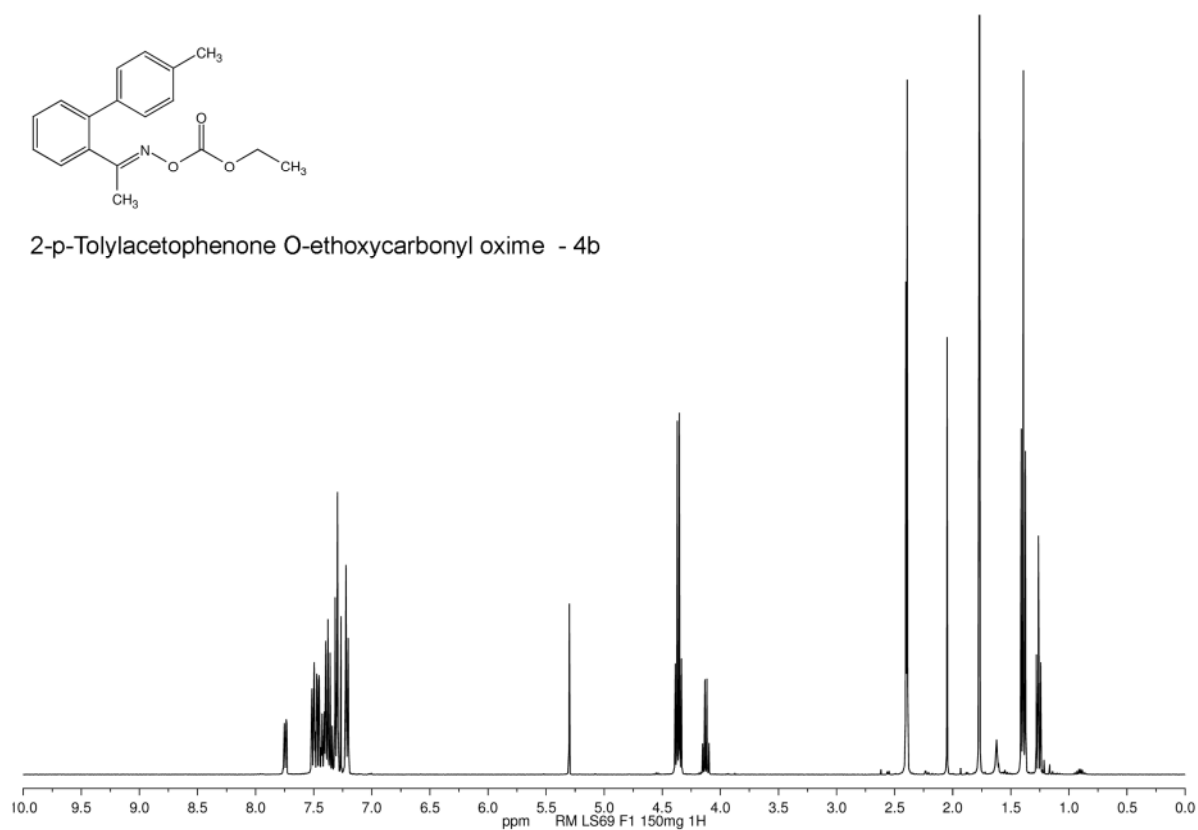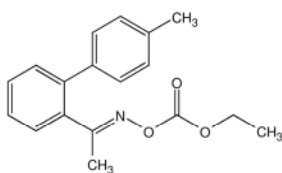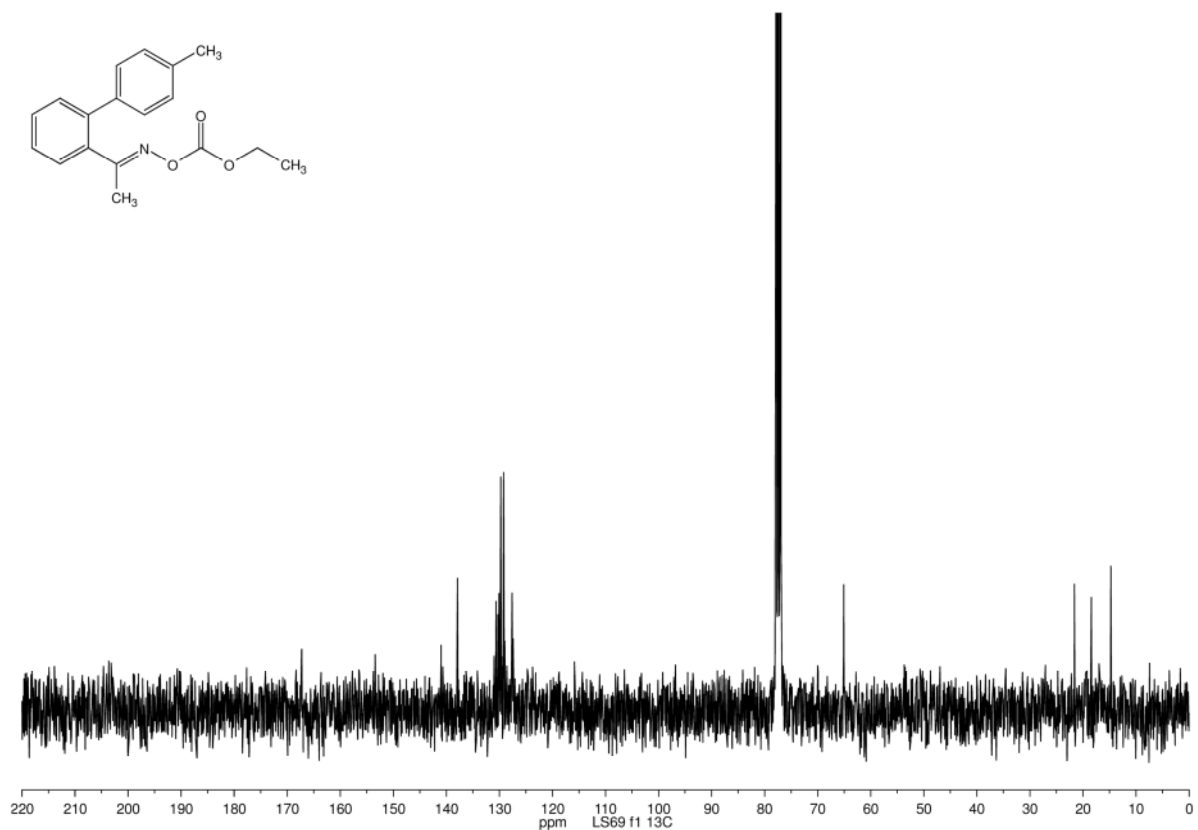

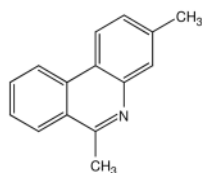

3,6-Dimethylphenanthridine - 5b

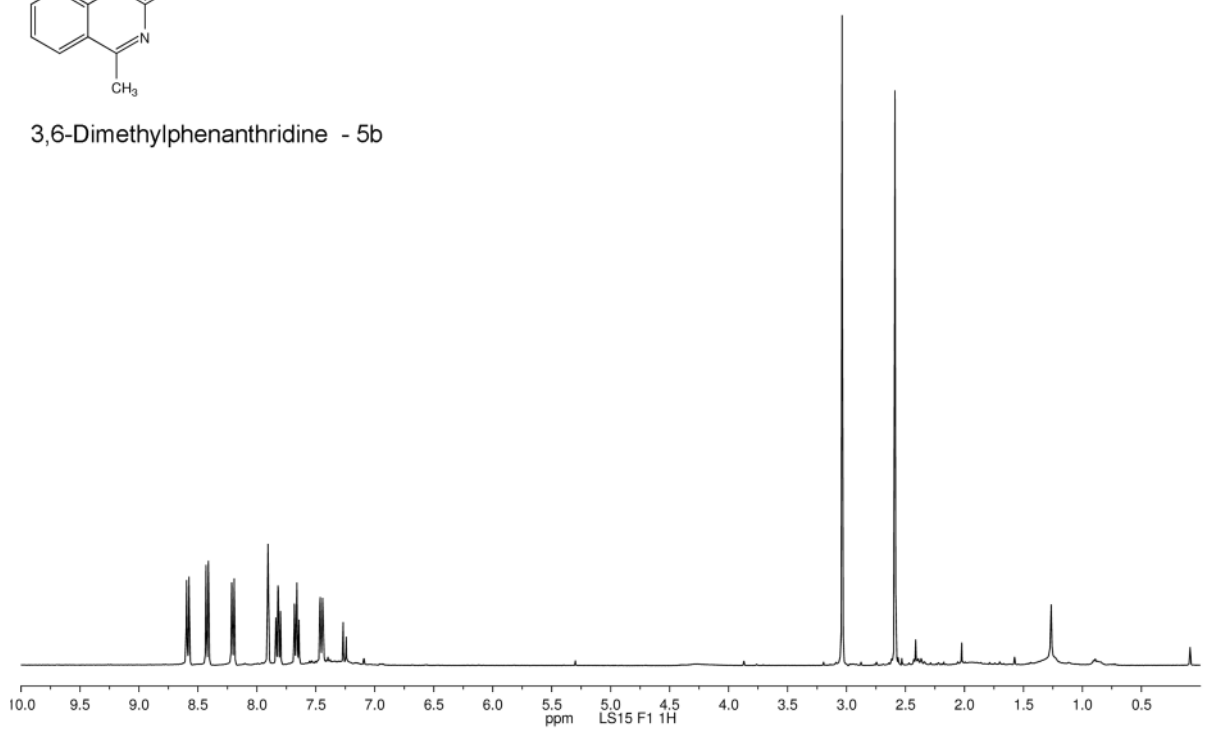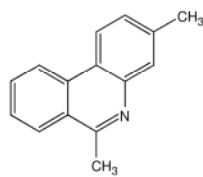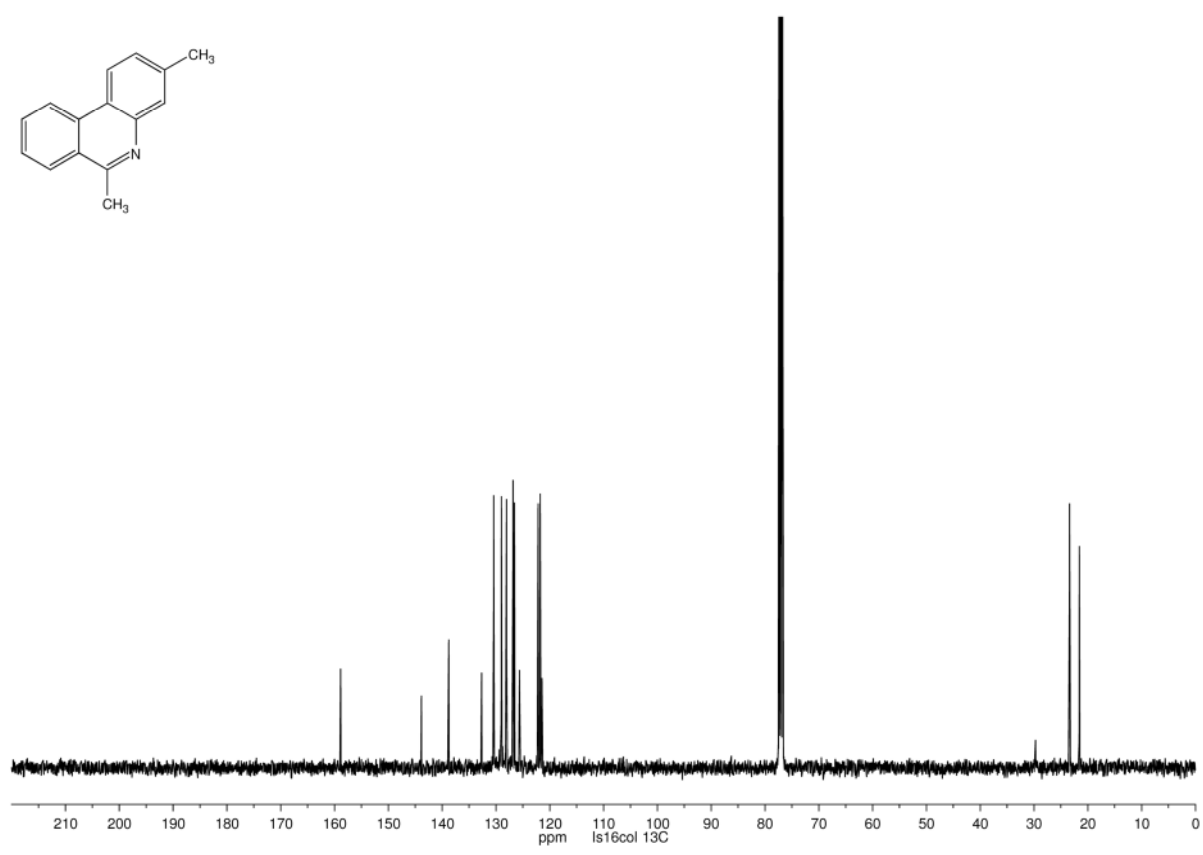

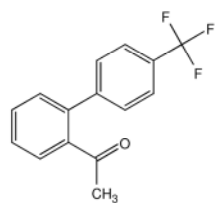

2-p-Trifluoromethylphenylacetophenone

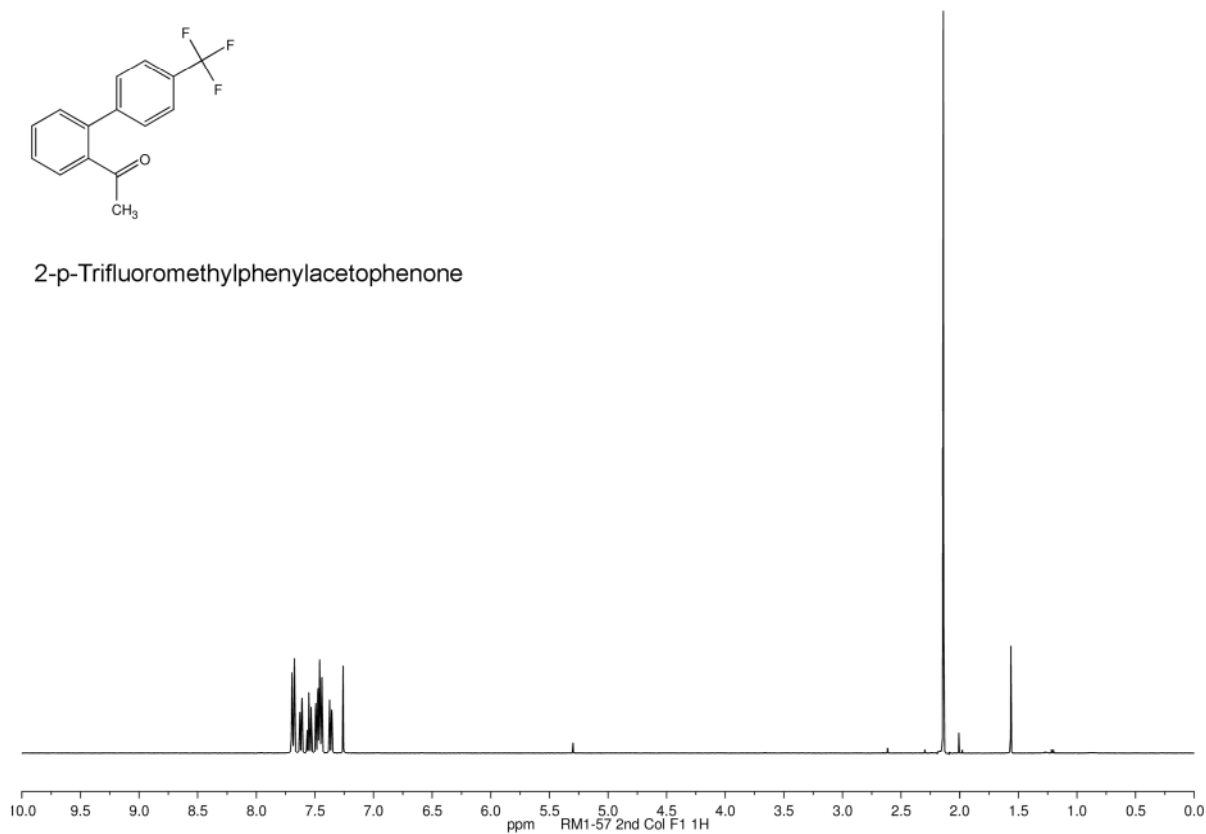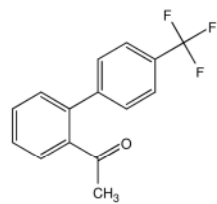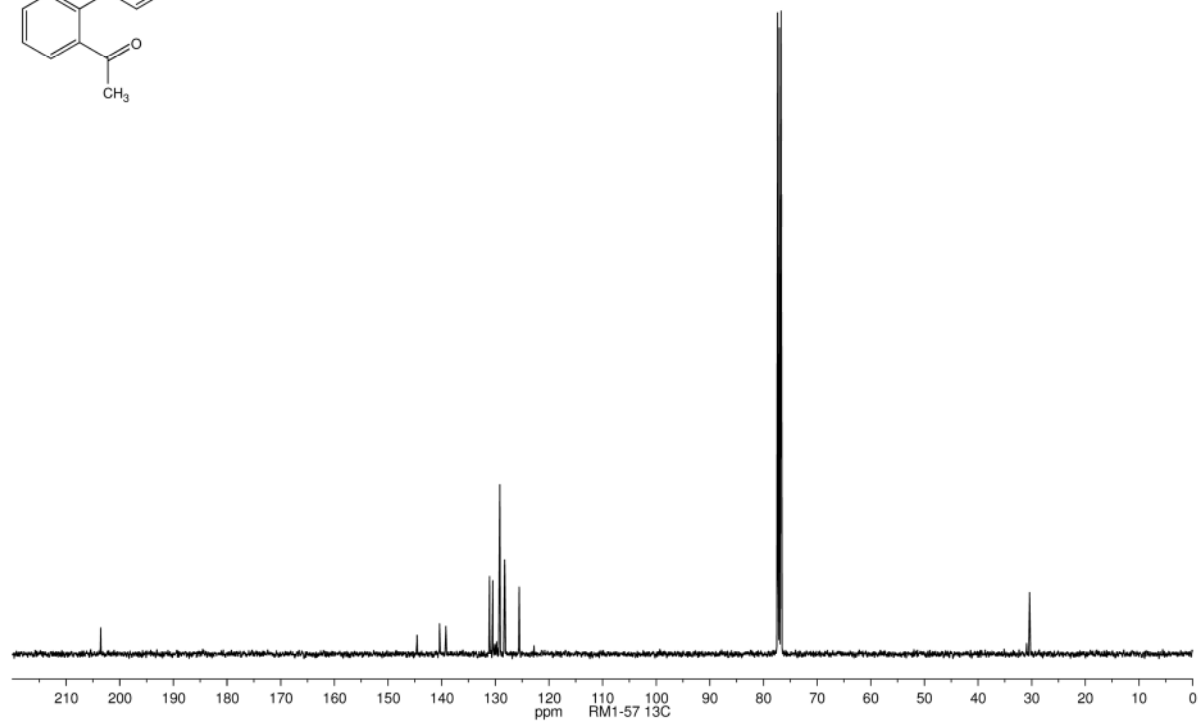

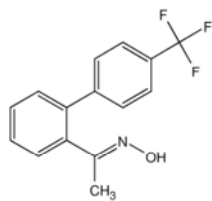

2-p-Trifluoromethylphenylacetophenone oxime

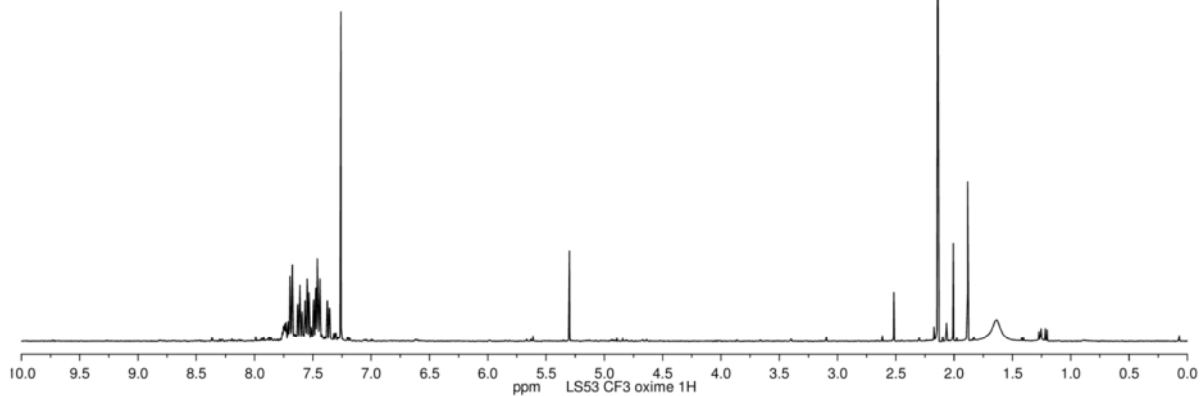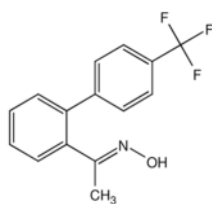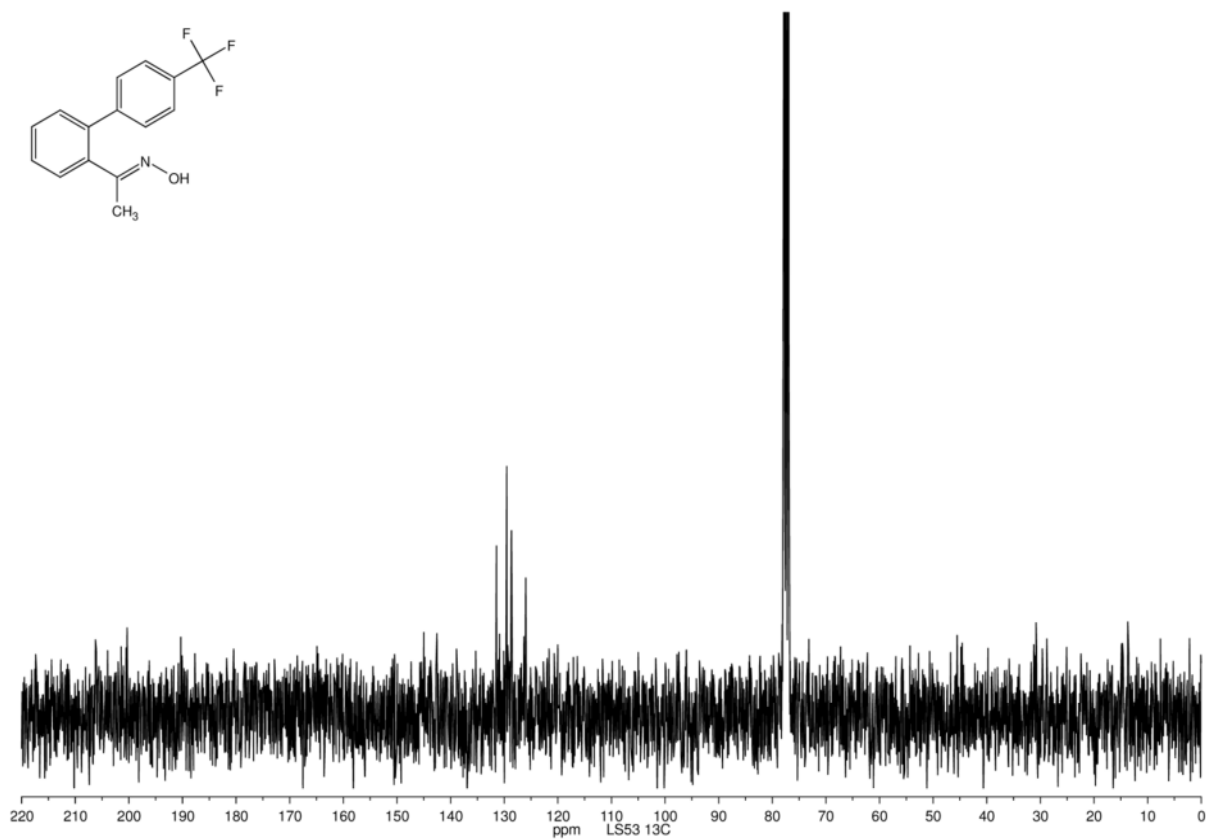

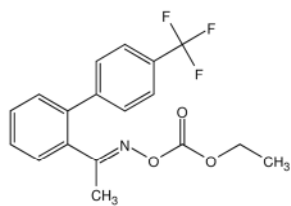

2-p-Trifluoromethylphenylacetophenone O-ethoxycarbonyl oxime - 4c

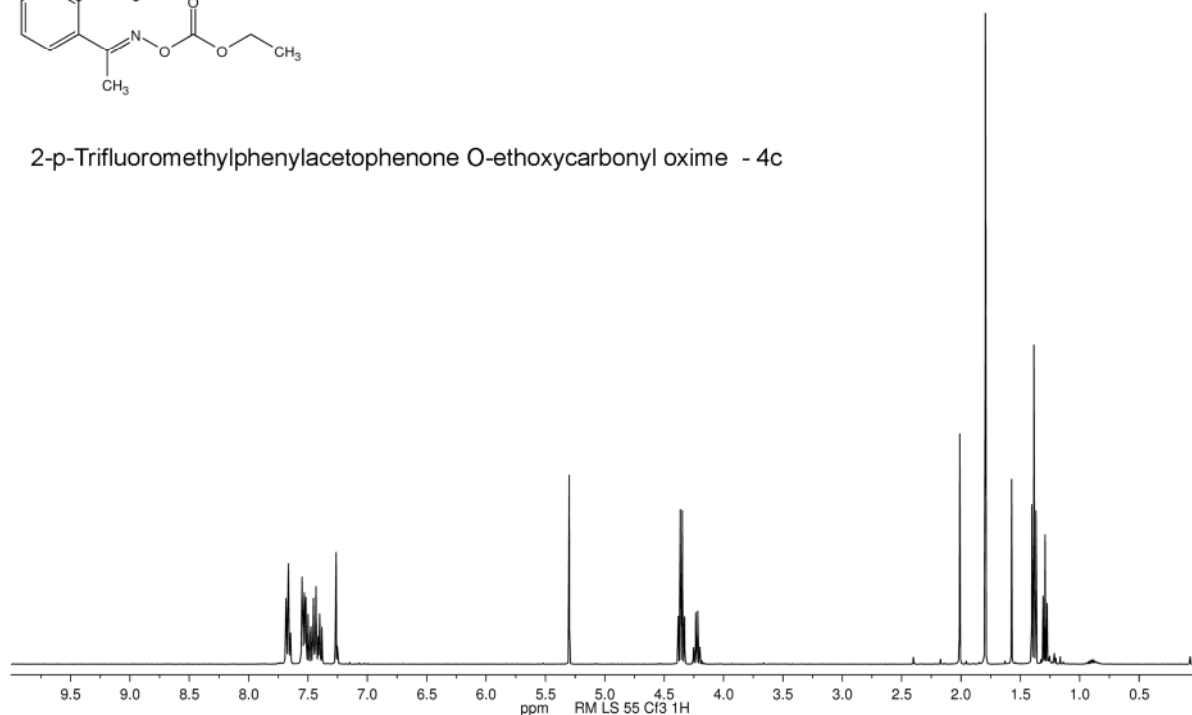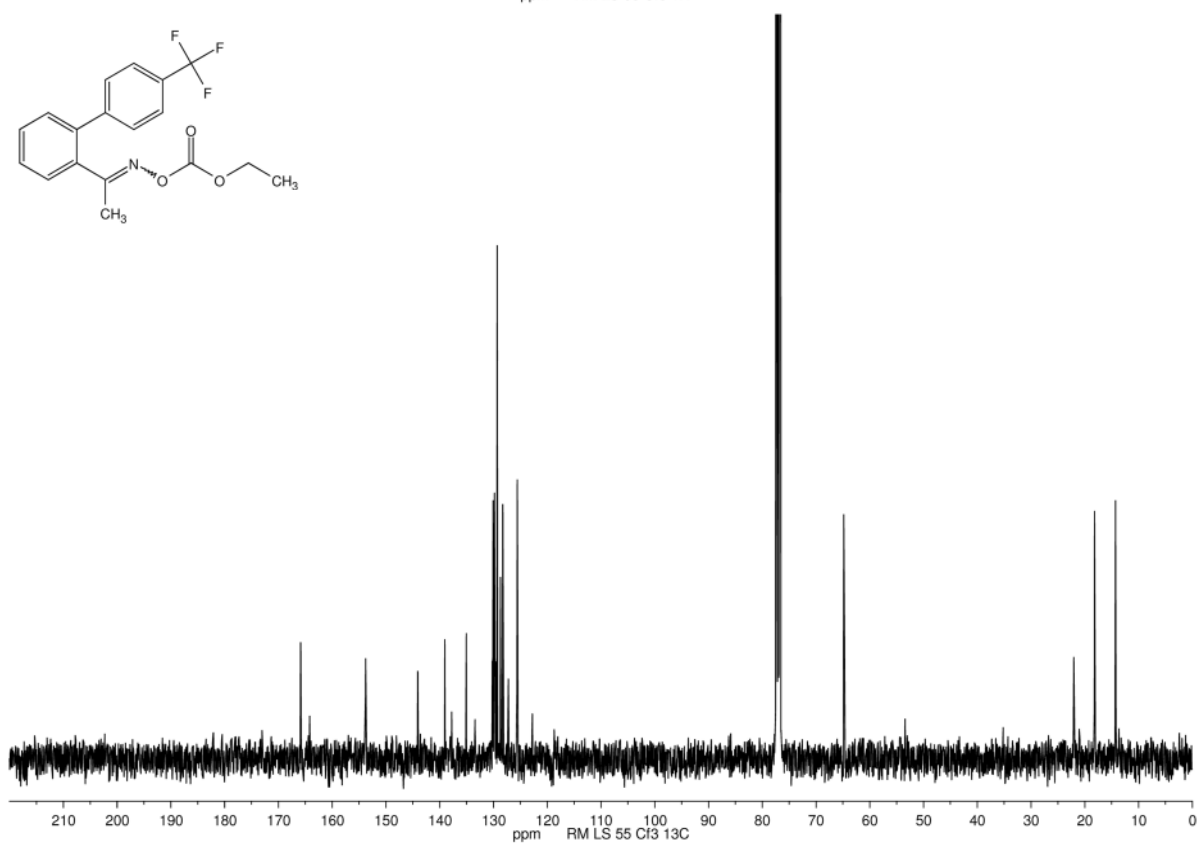

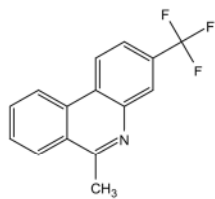

6-methyl-3-(trifluoromethyl)phenanthridine - 5c

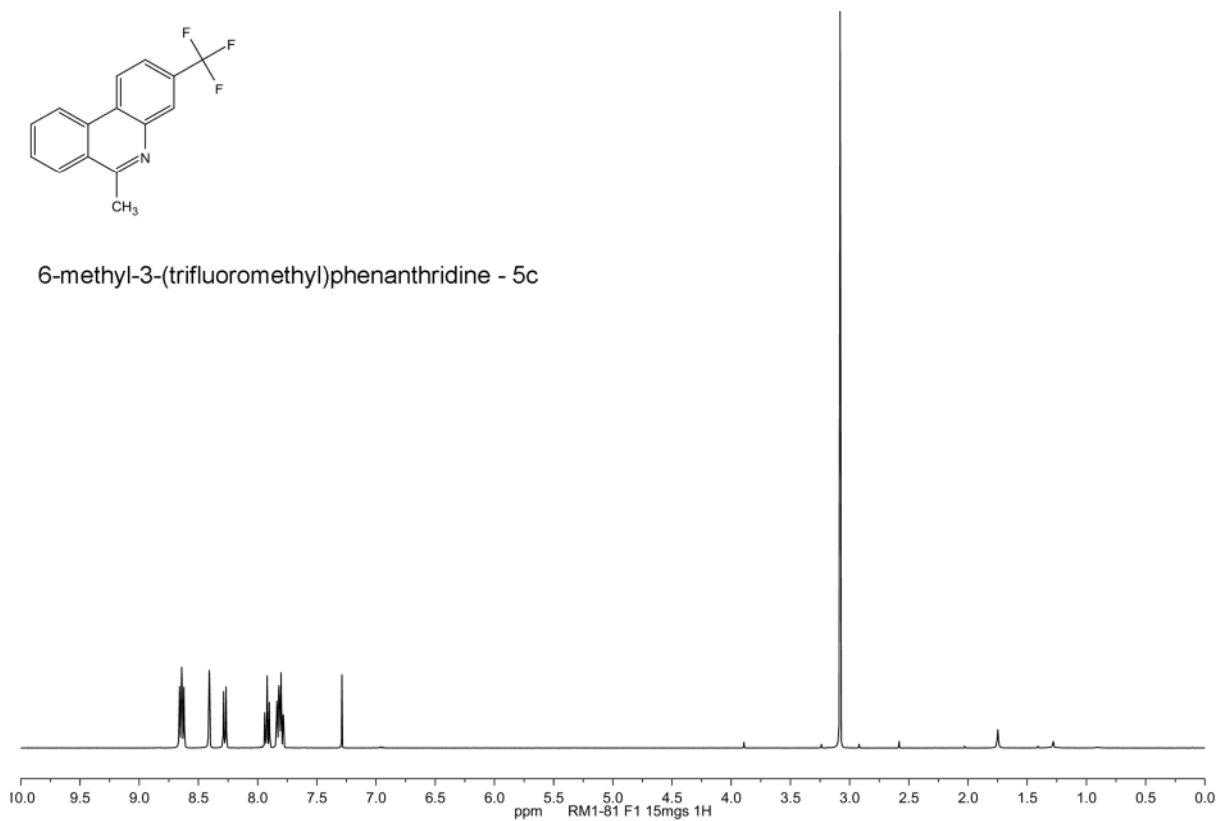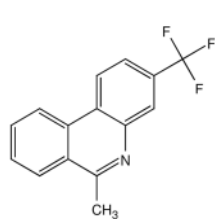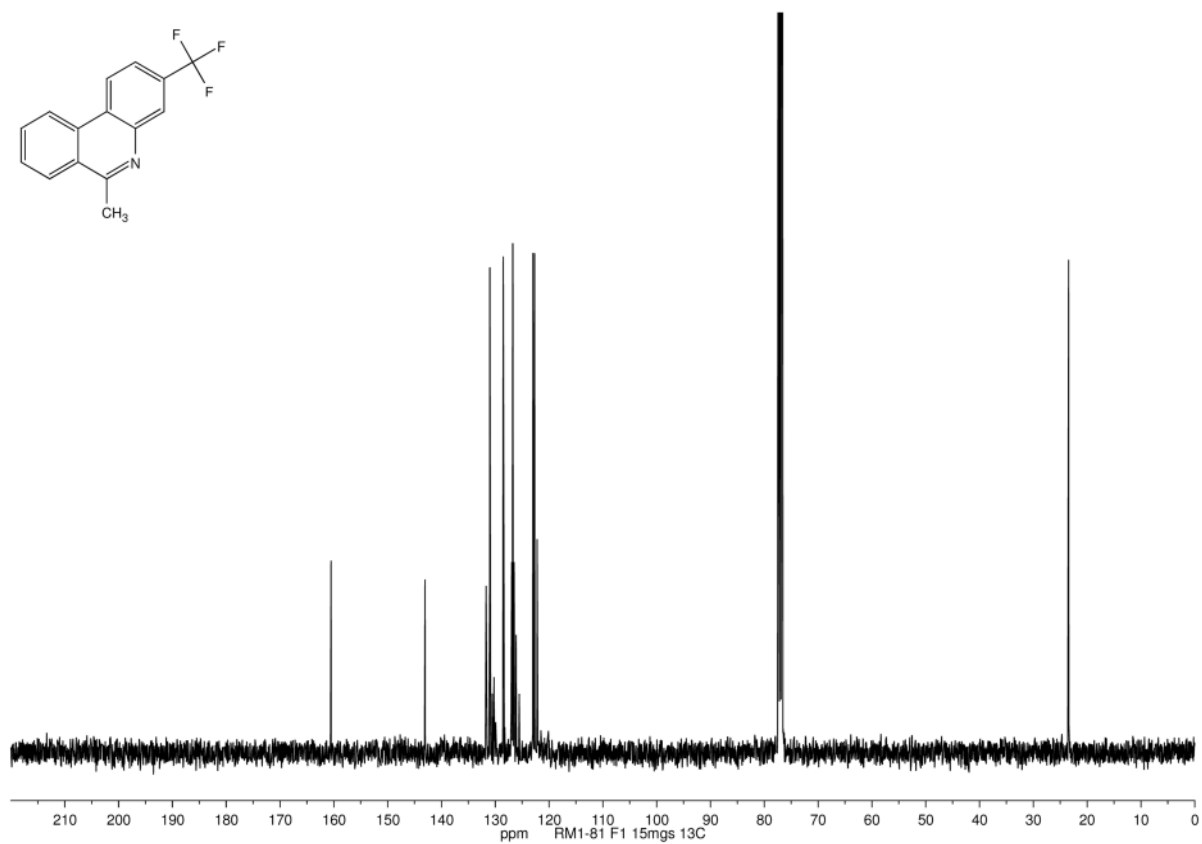



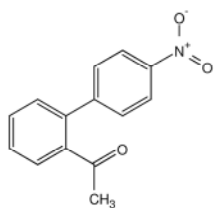

2-p-Nitrophenylacetophenone

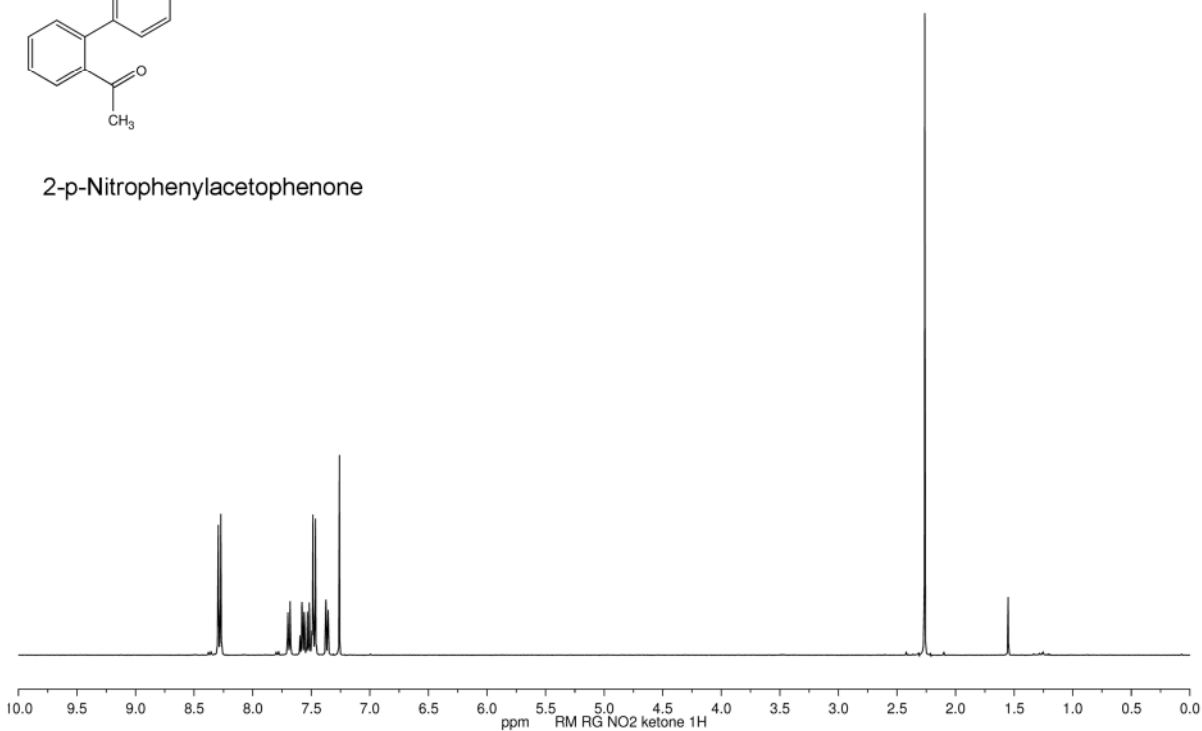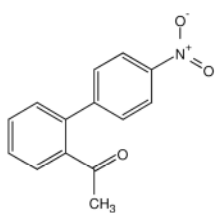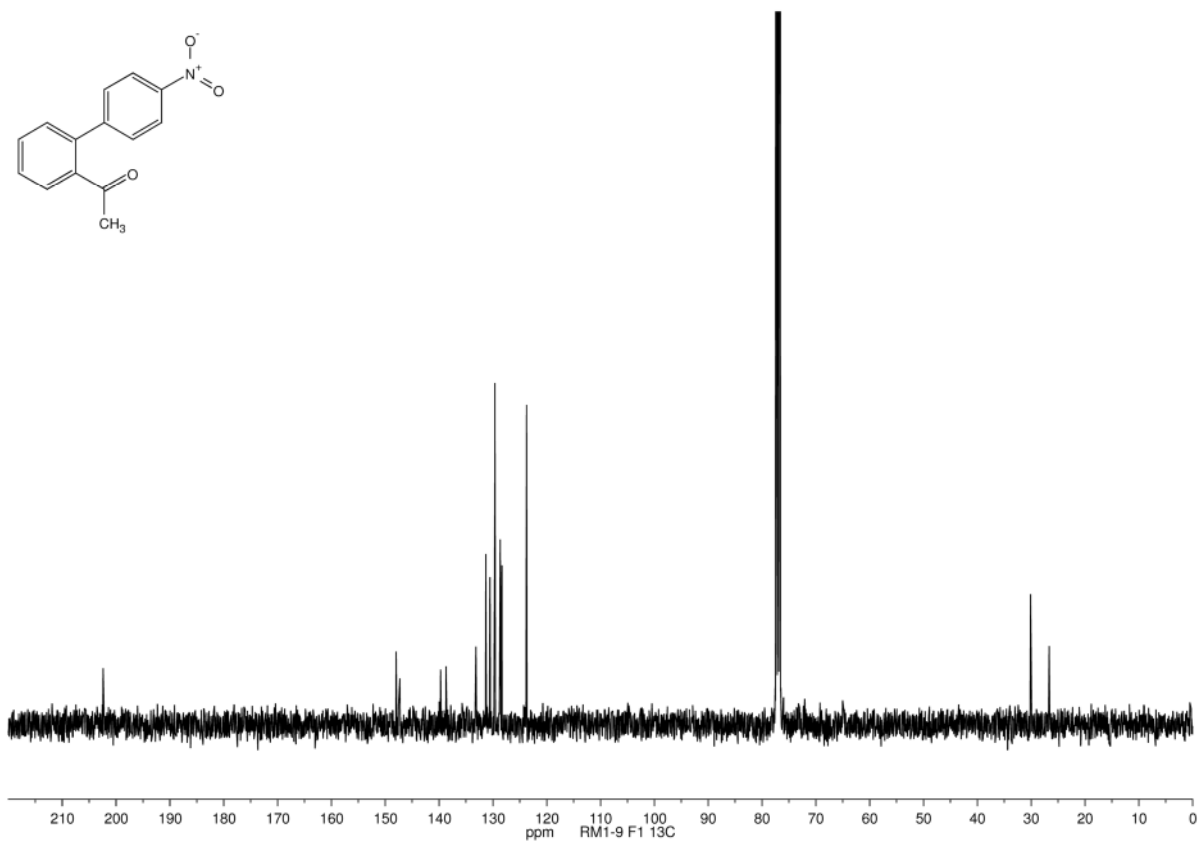

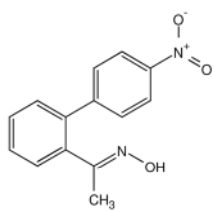

2-p-Nitrophenylacetophenone oxime

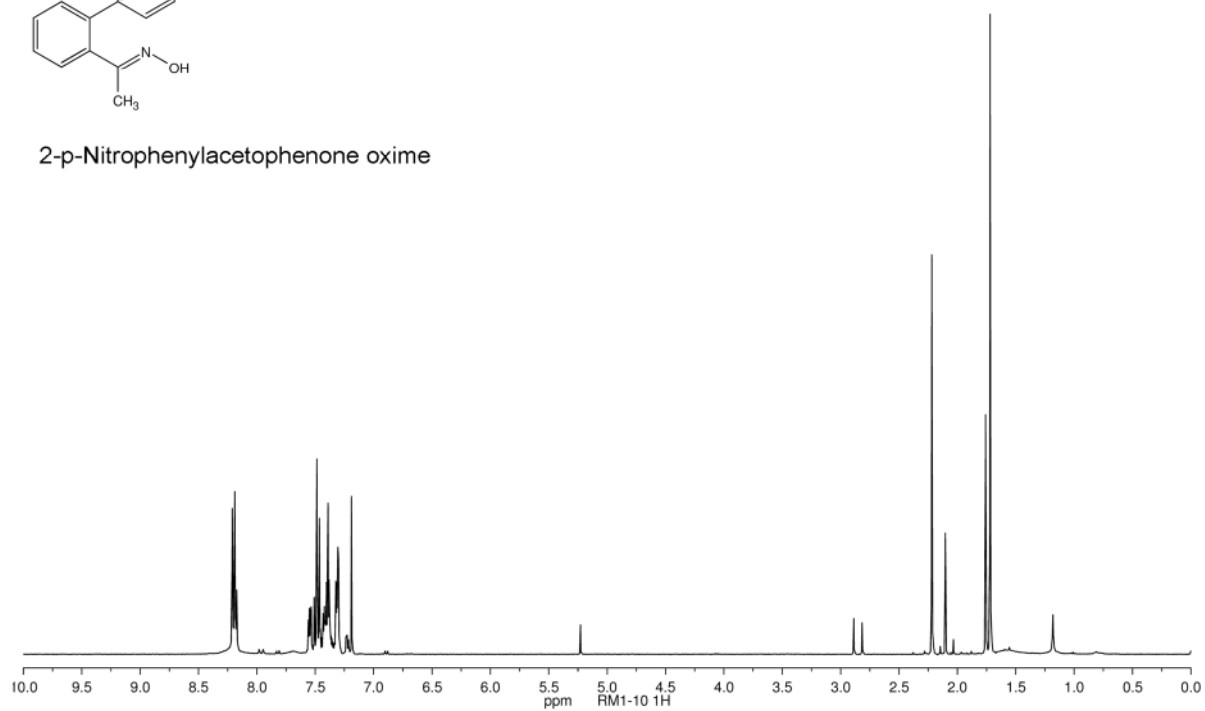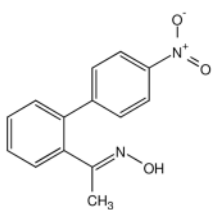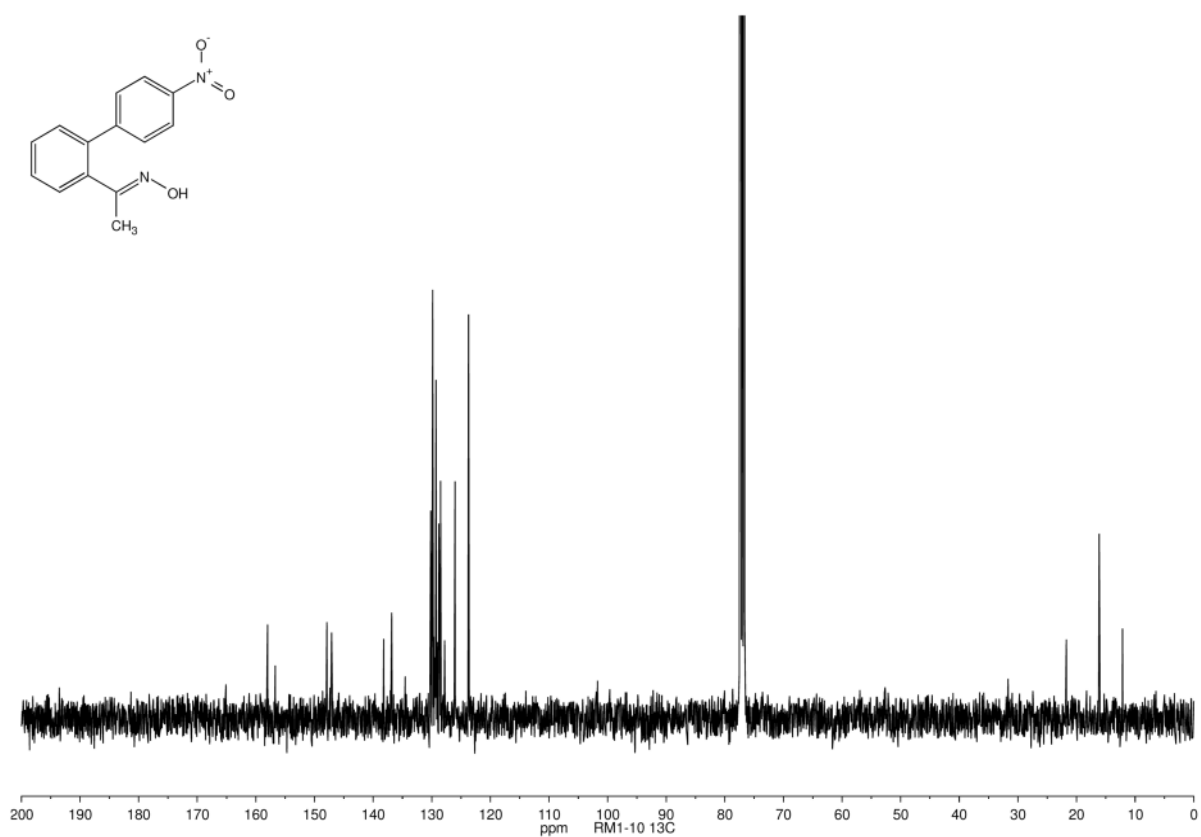

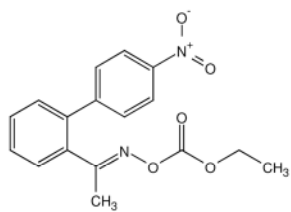

2-p-Nitrophenylacetophenone O-ethoxycarbonyl oxime - 4d

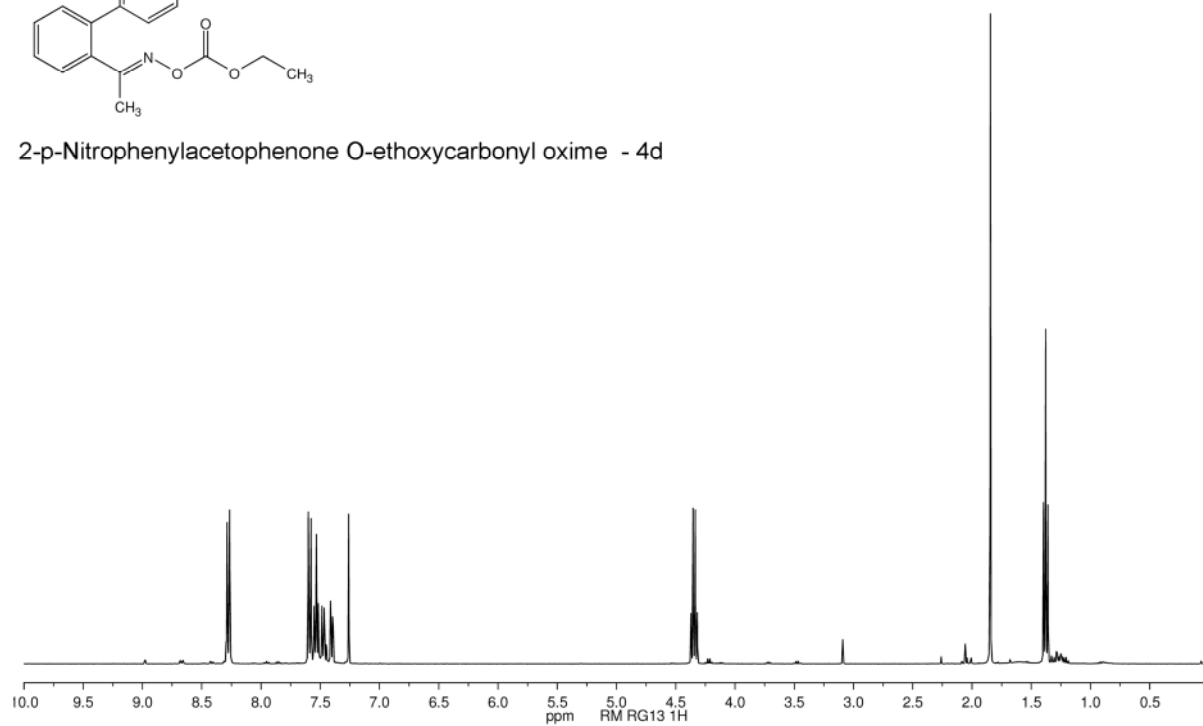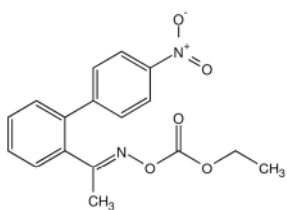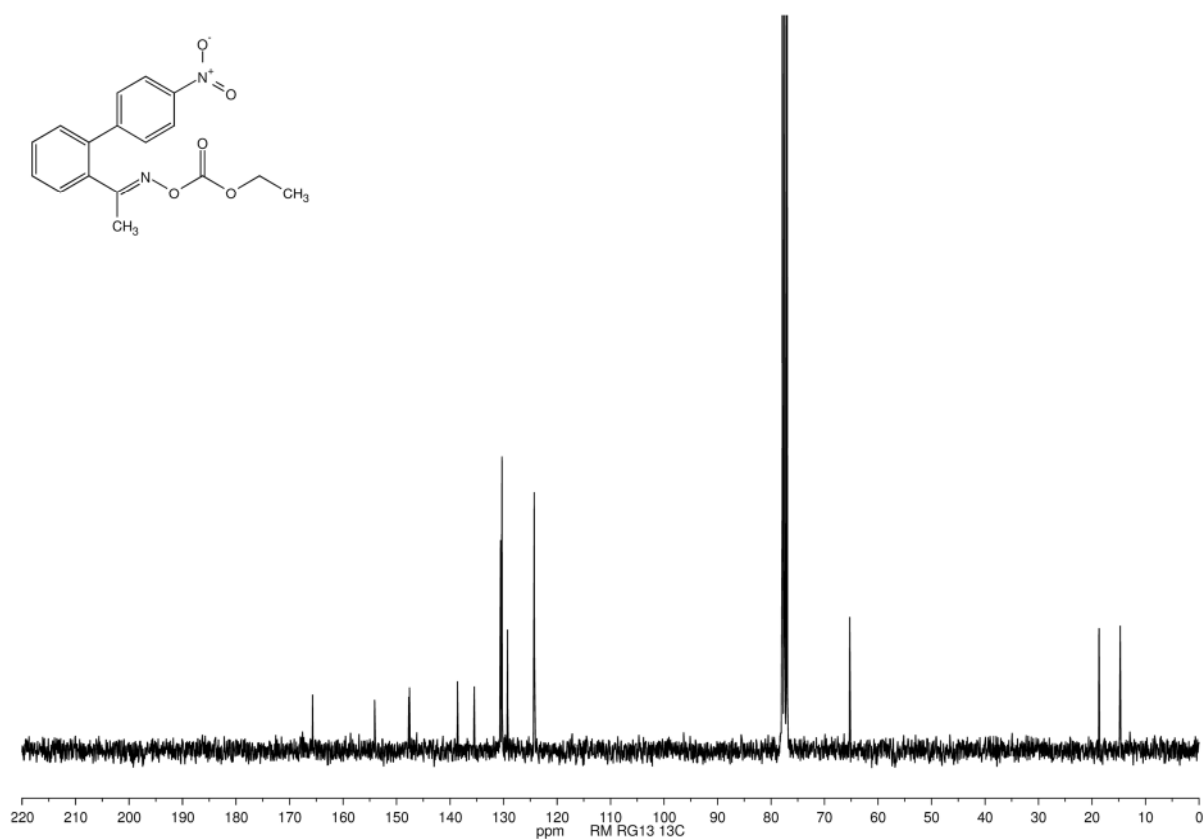

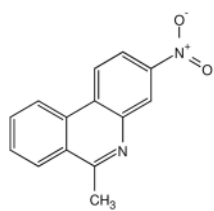

6-Methyl-3-nitrophenanthridine - 5d

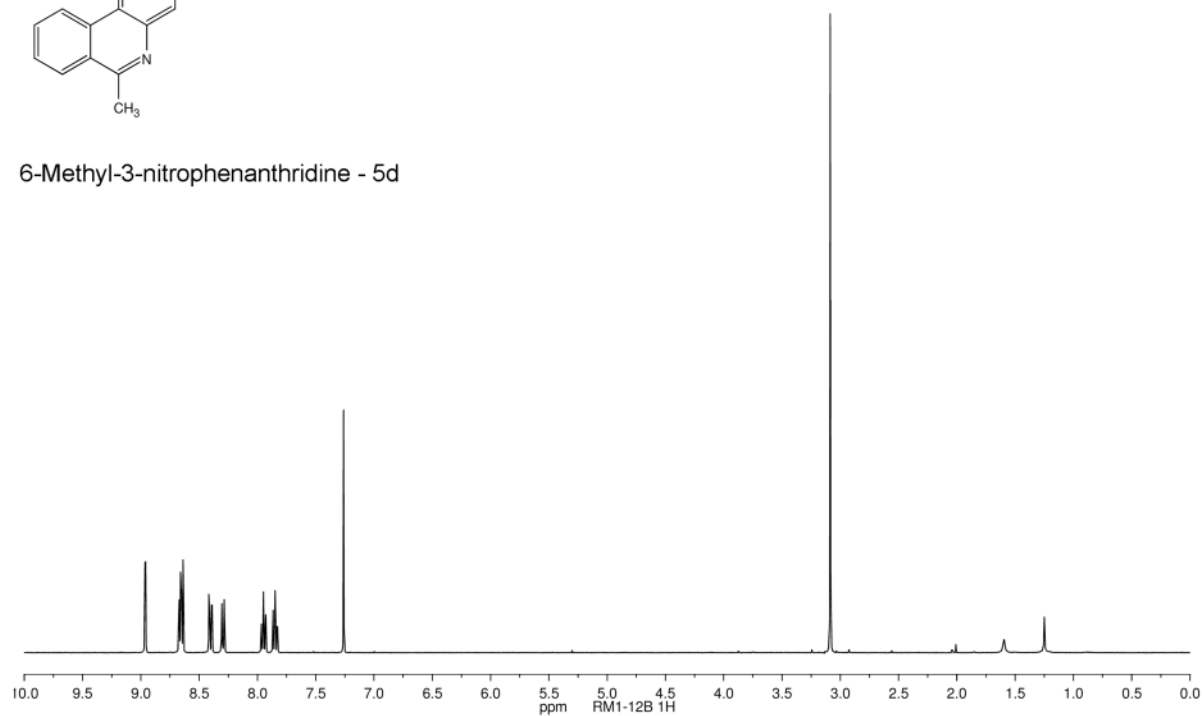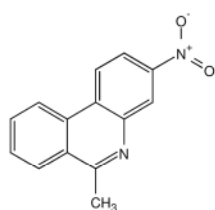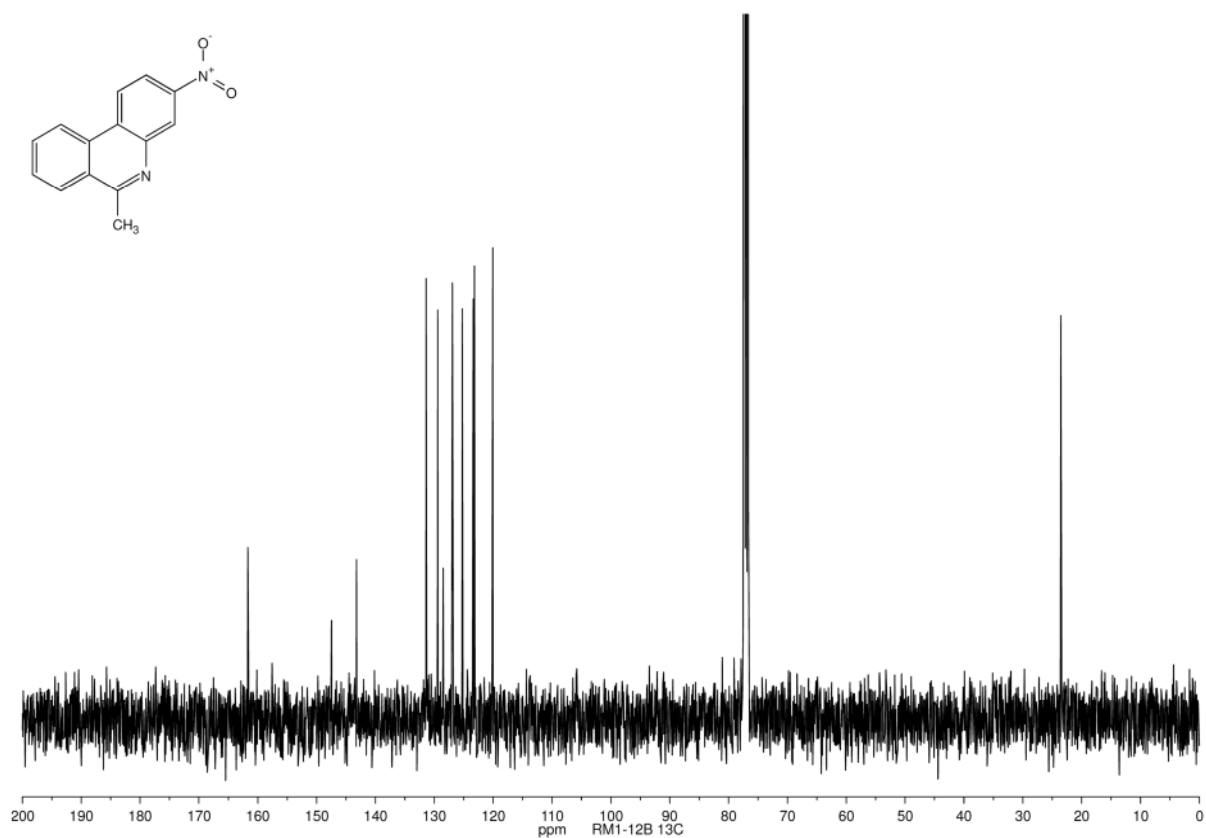

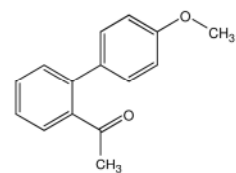

2-p-Methoxyphenylacetophenone

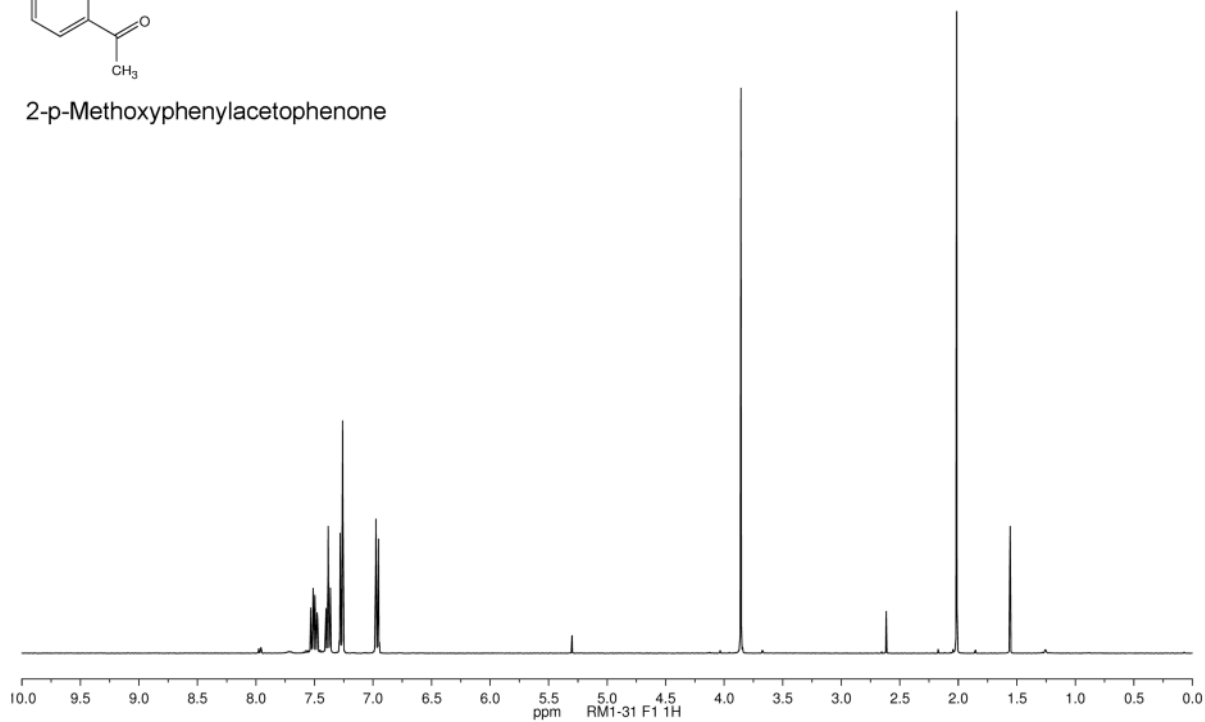

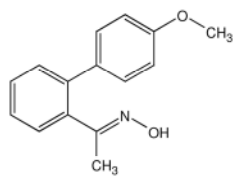

2-p-Methoxyphenylacetophenone oxime

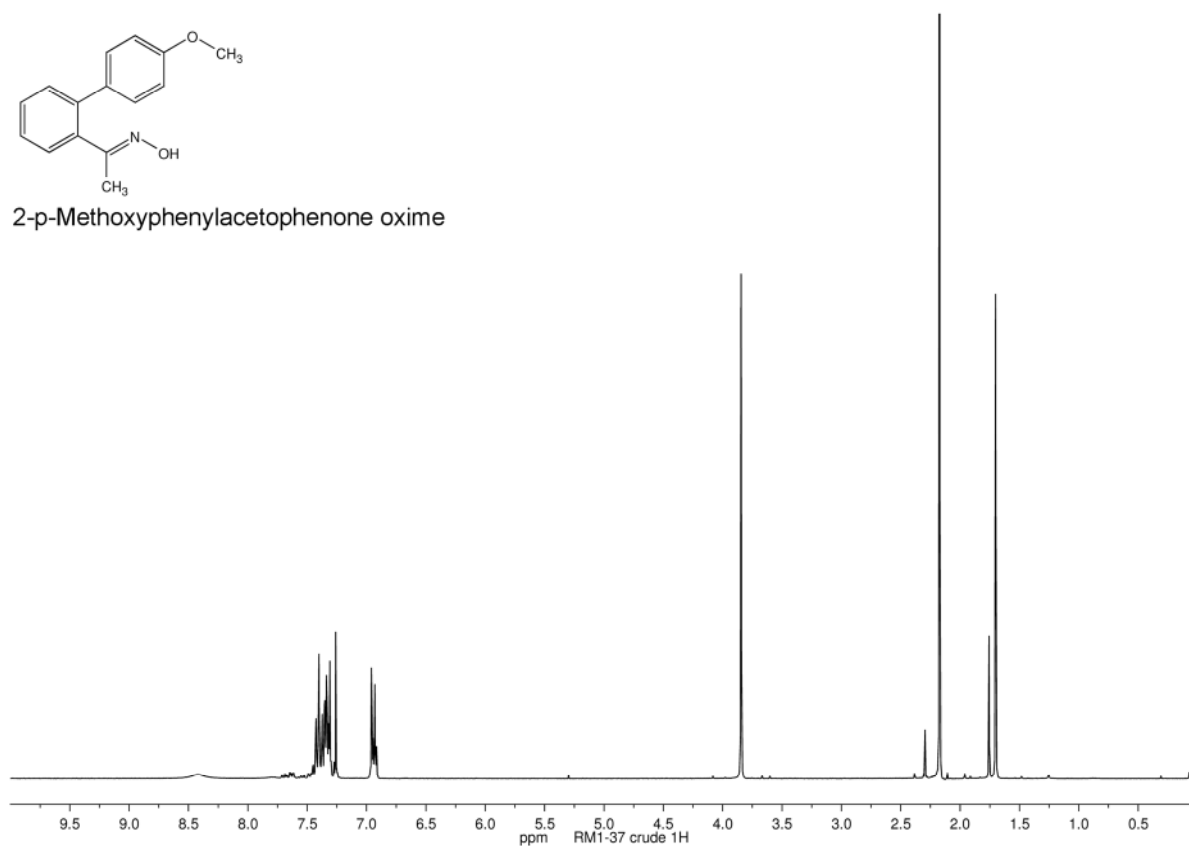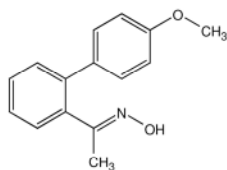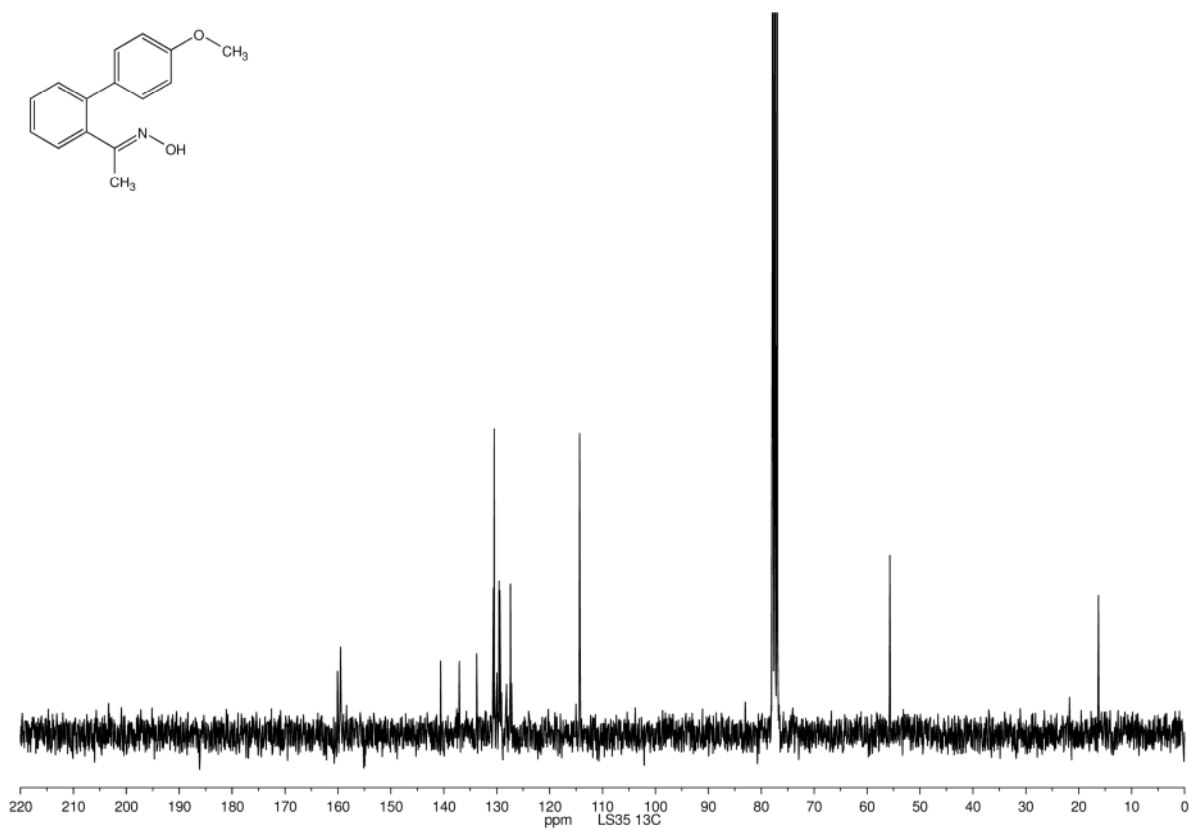

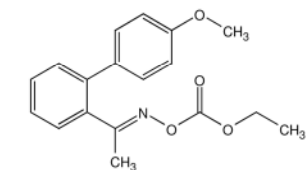

2-p-Methoxyphenylacetophenone O-ethoxycarbonyl oxime - 4e

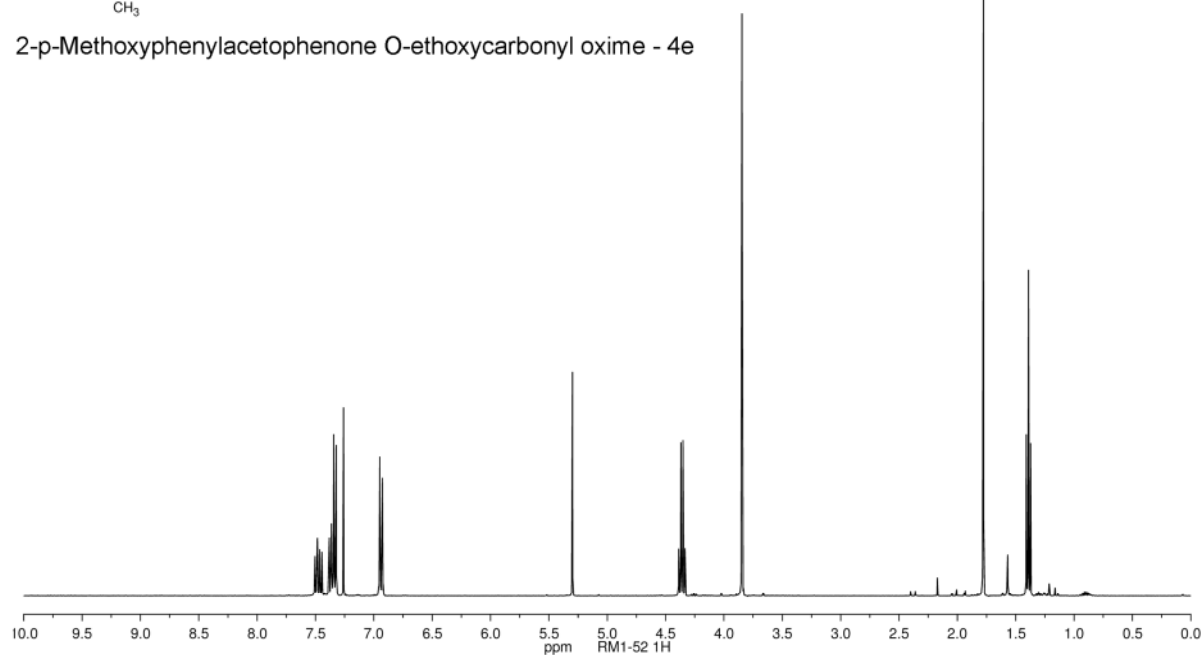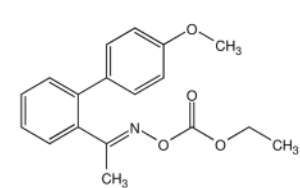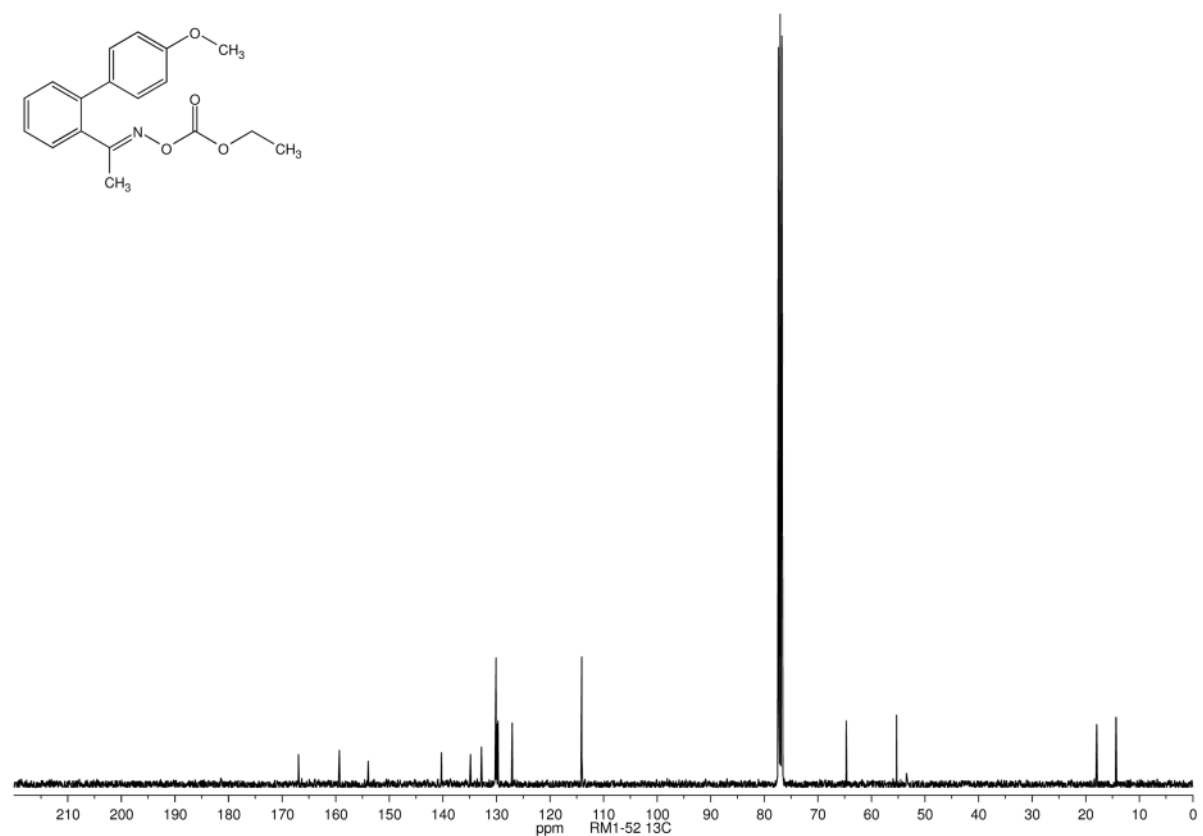

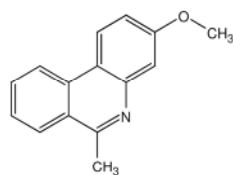

3-Methoxy-6-methylphenanthridine - 5e

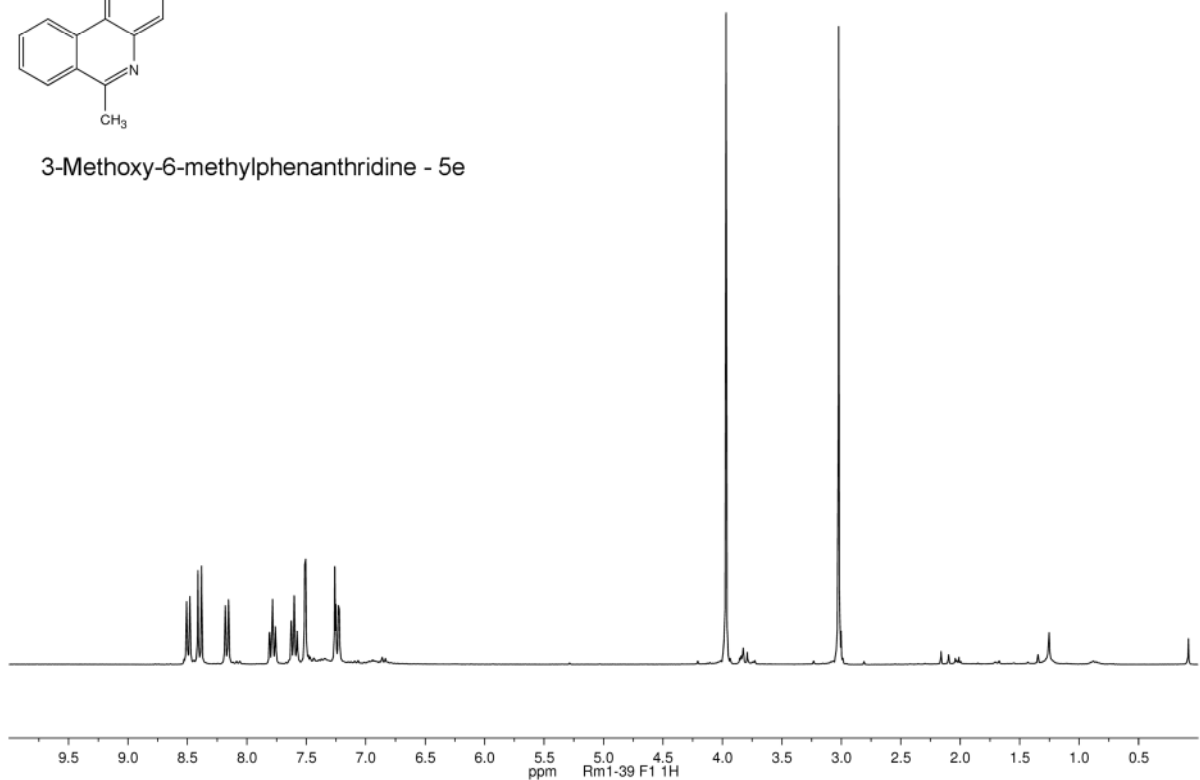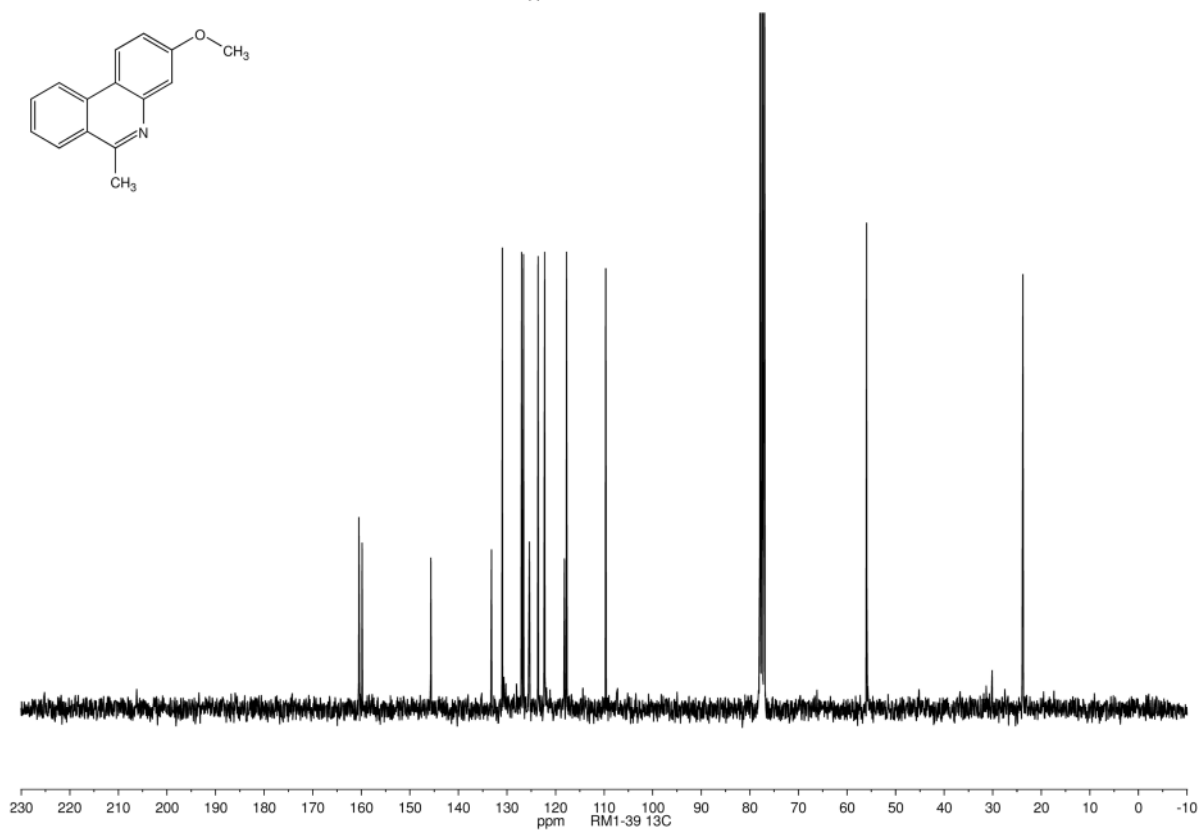



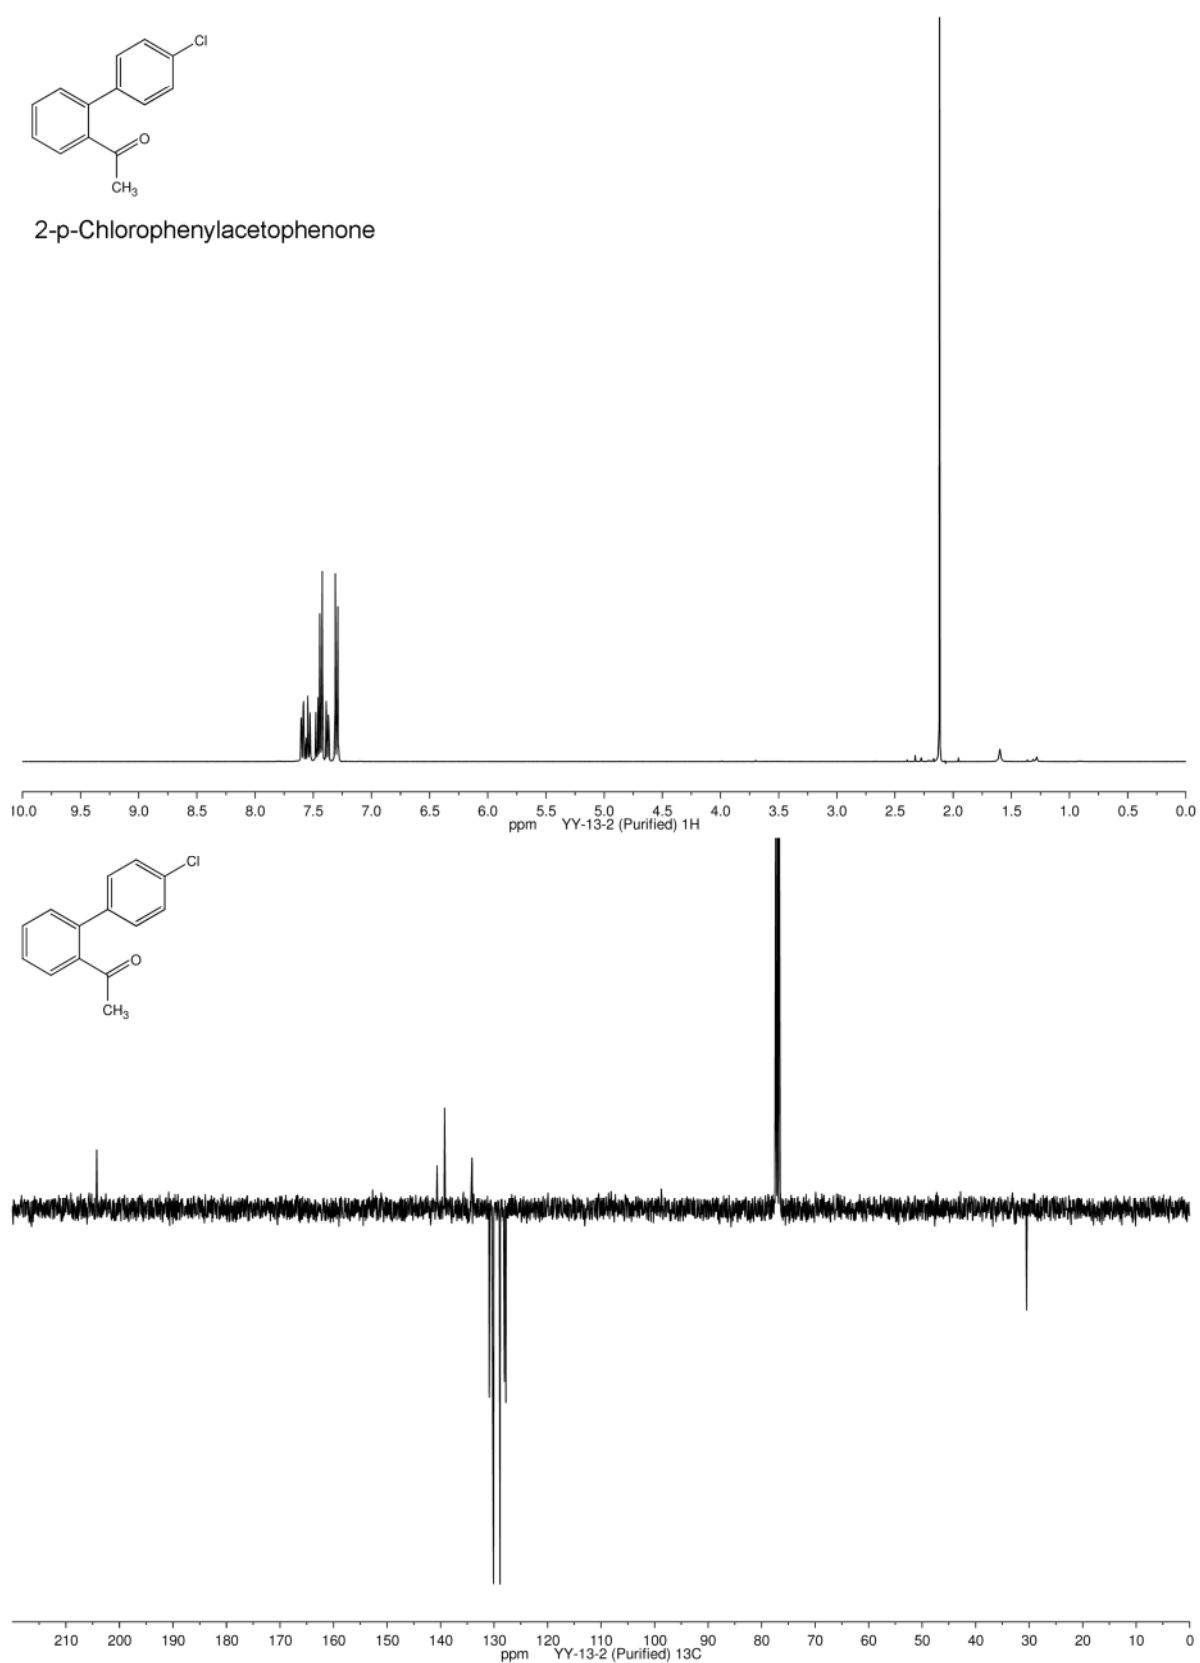

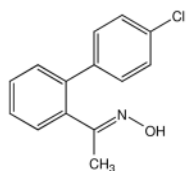

2-p-Chlorophenylacetophenone oxime

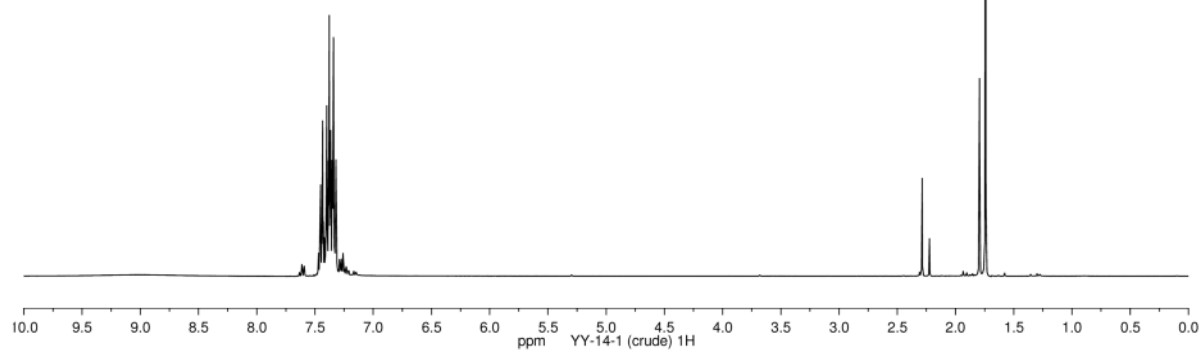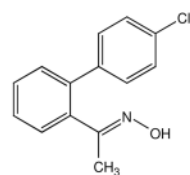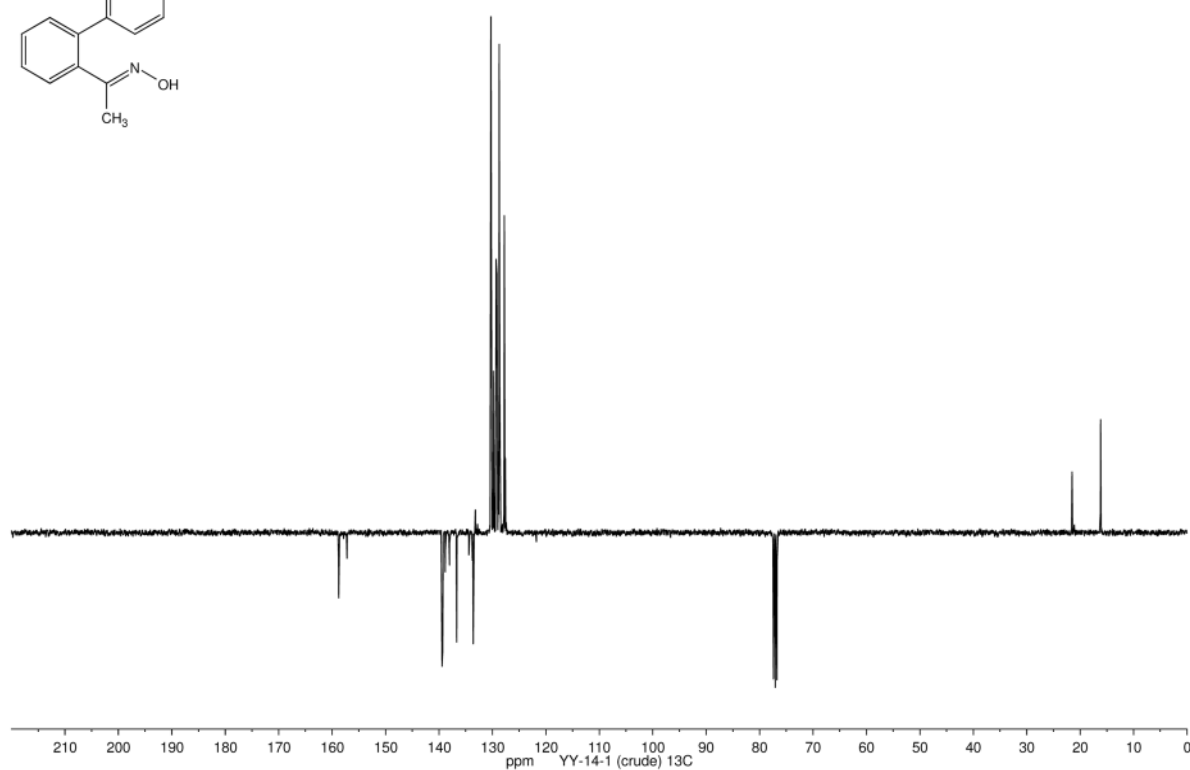

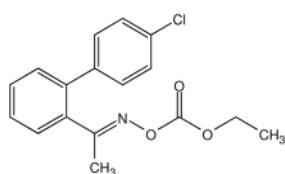

2-p-Chlorophenylacetophenone O-ethoxycarbonyl oxime - 4f

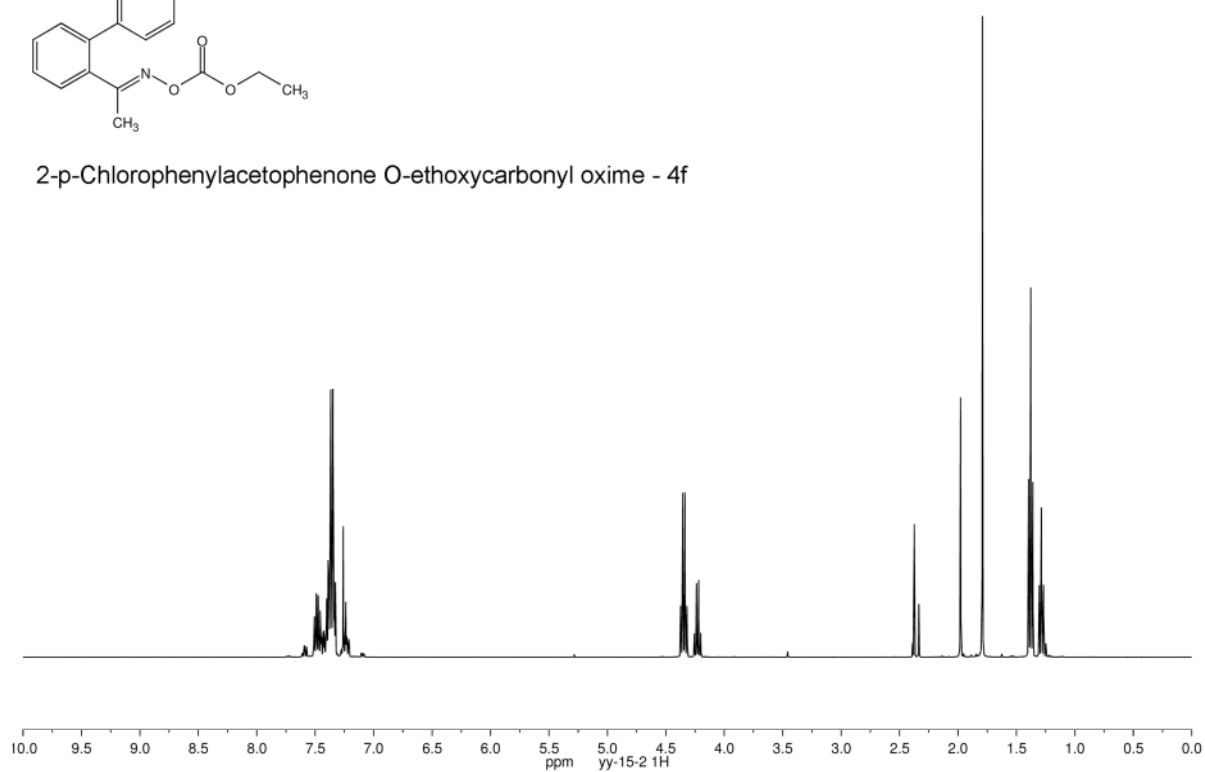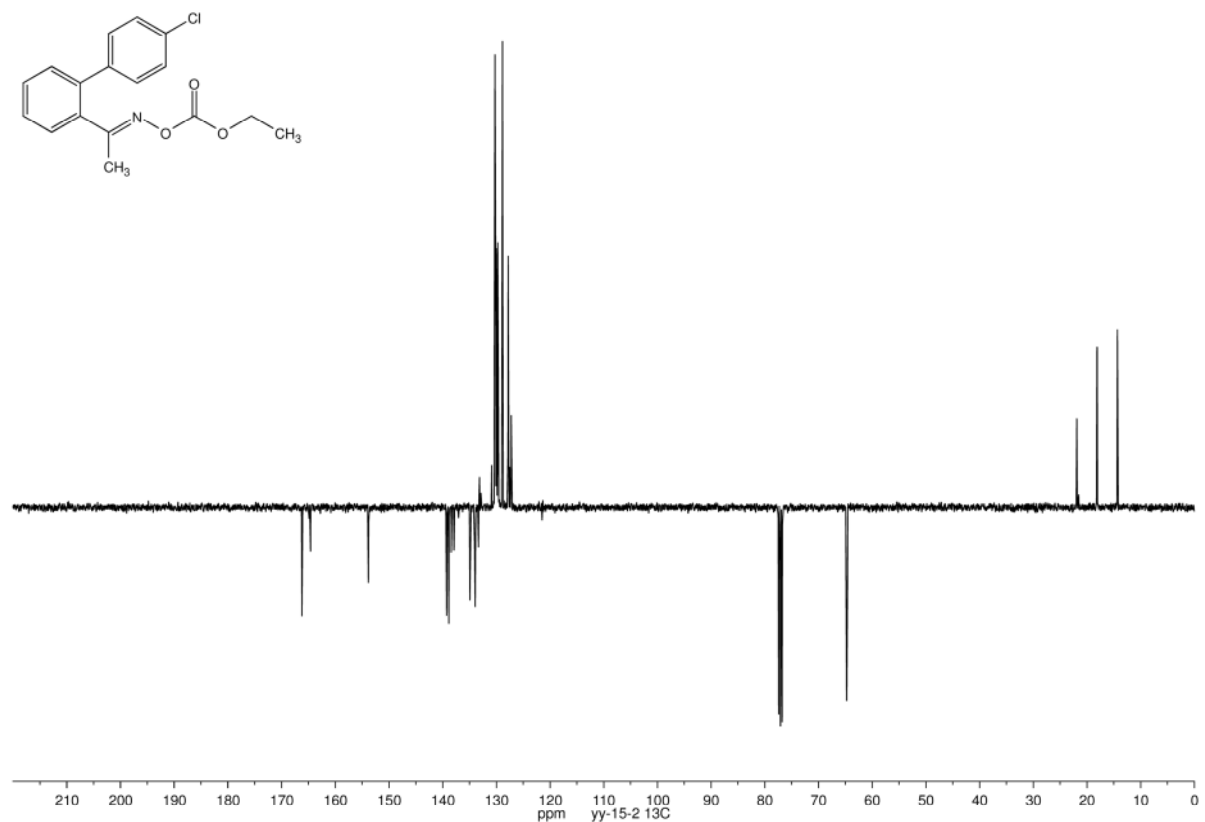

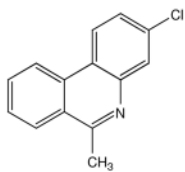

3-Chloro-6-methylphenanthridine - 5f

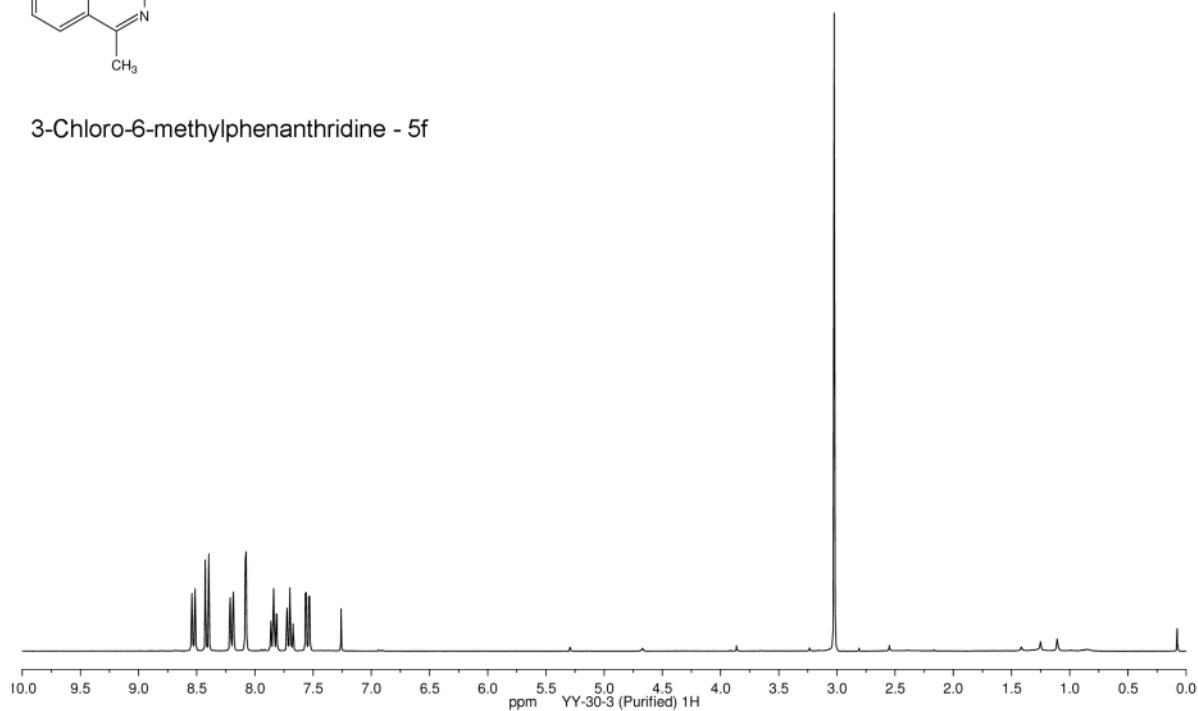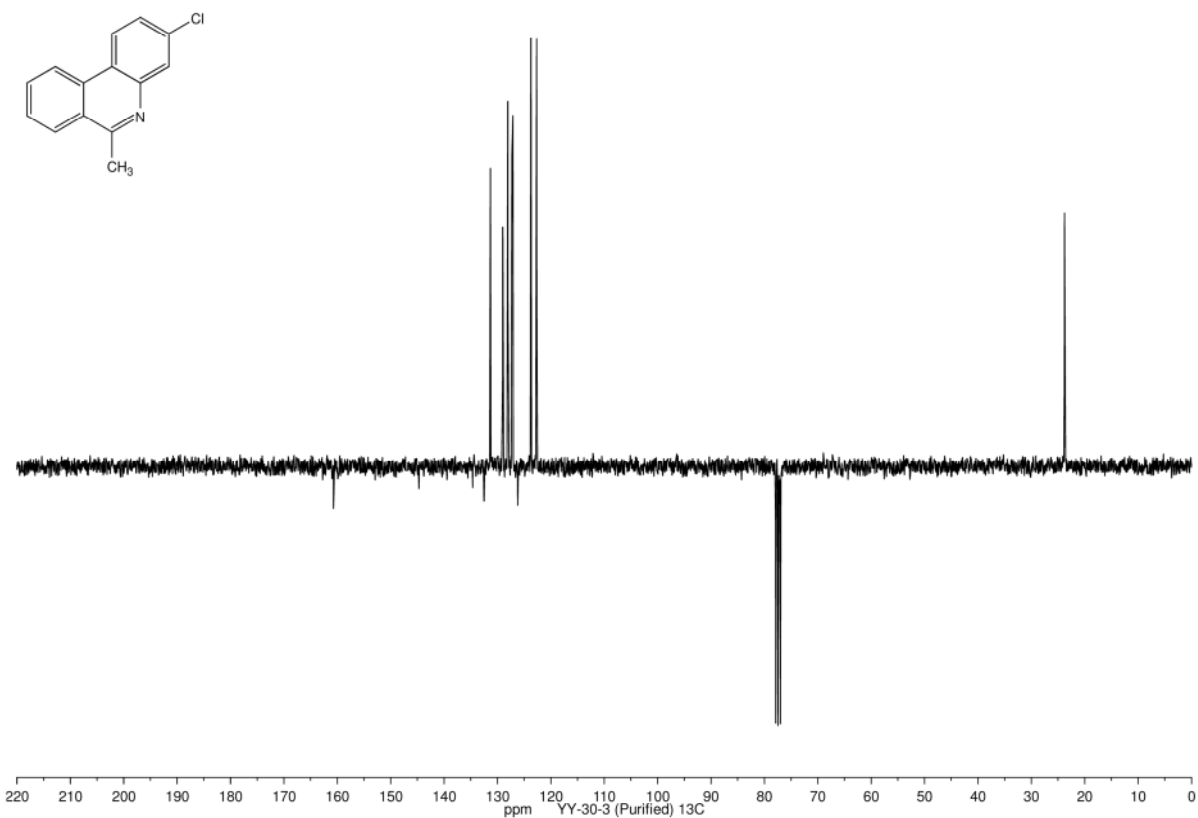

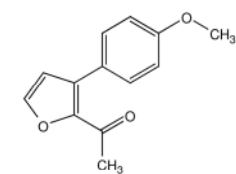

2-Acetyl-3-p-methoxyphenylfuran

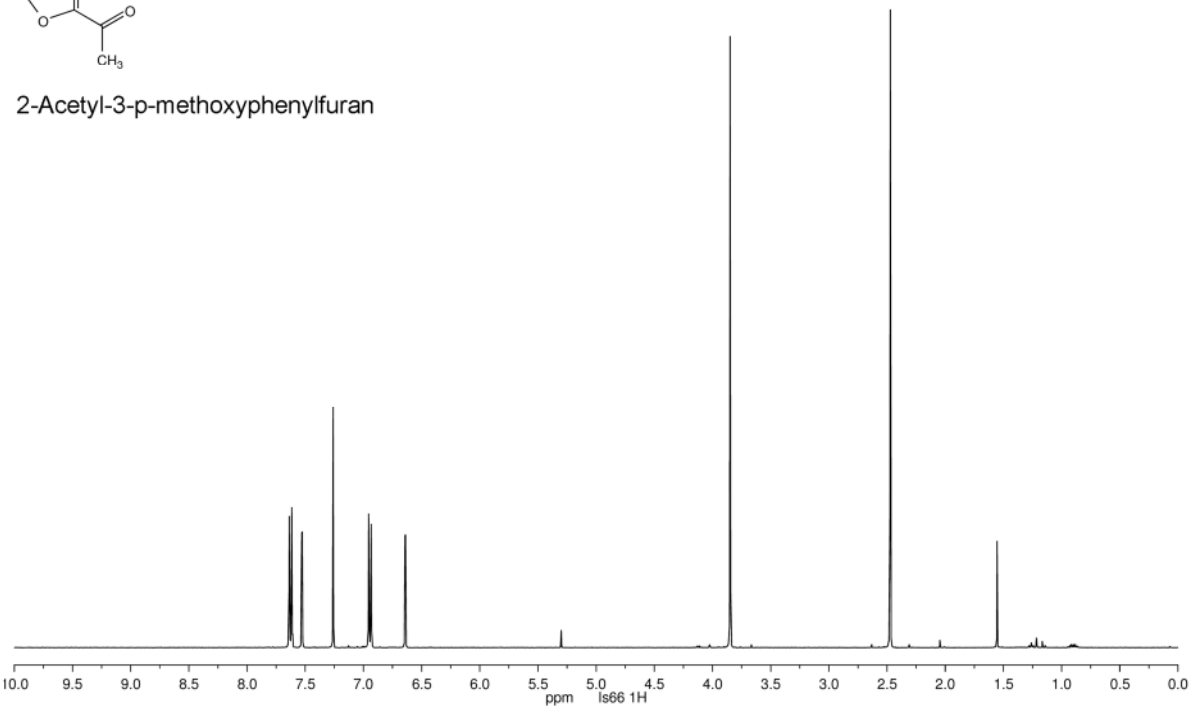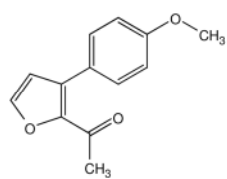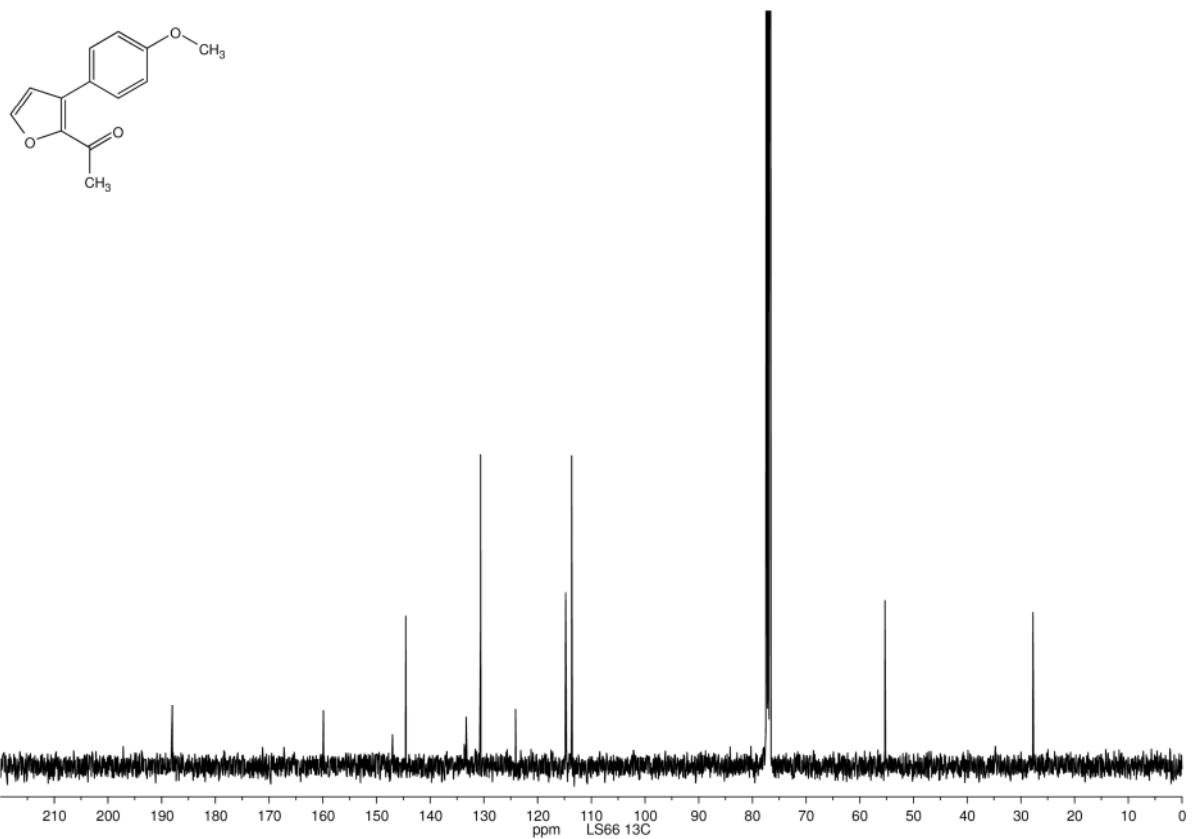

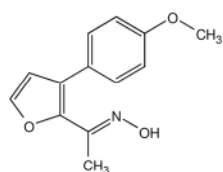

2-Acetyl-3-p-methoxyphenylfuran oxime

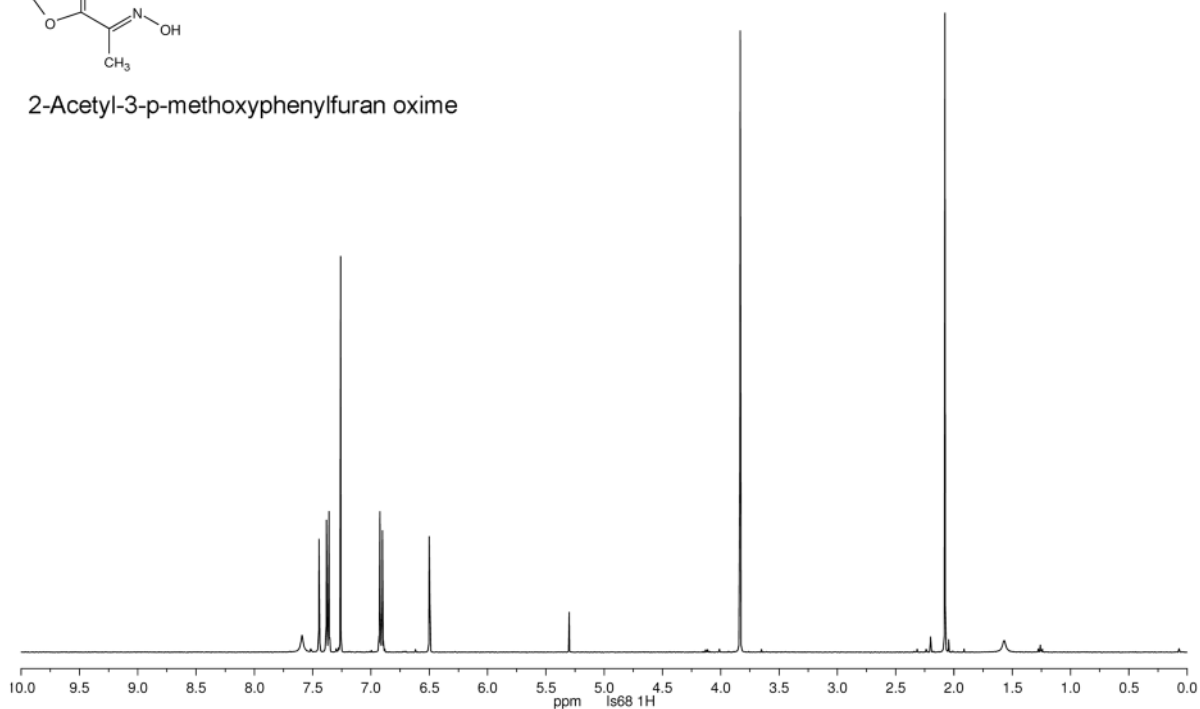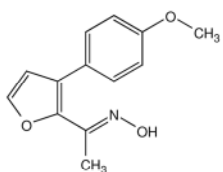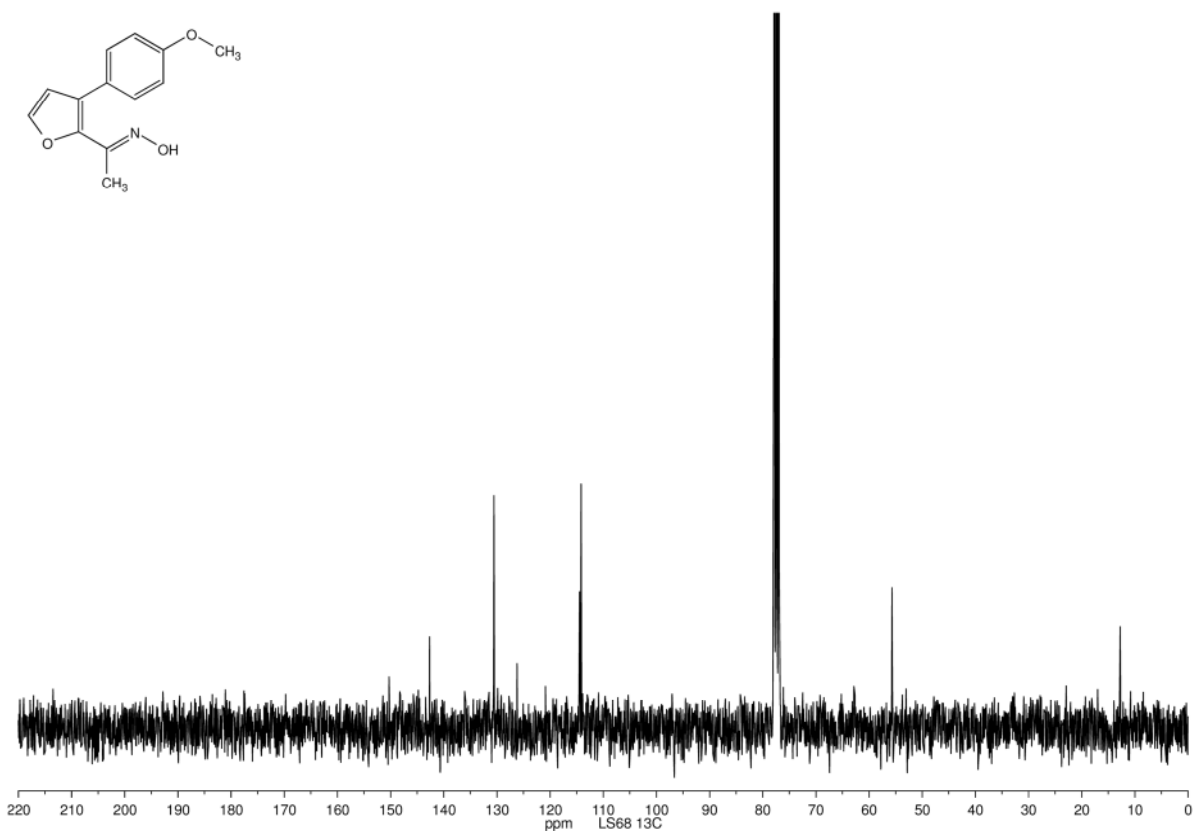

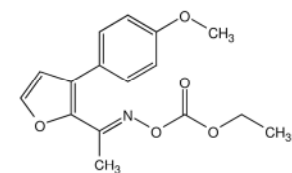

2-Acetyl-3-p-methoxyphenylfuran O-ethoxycarbonyl oxime - 6a

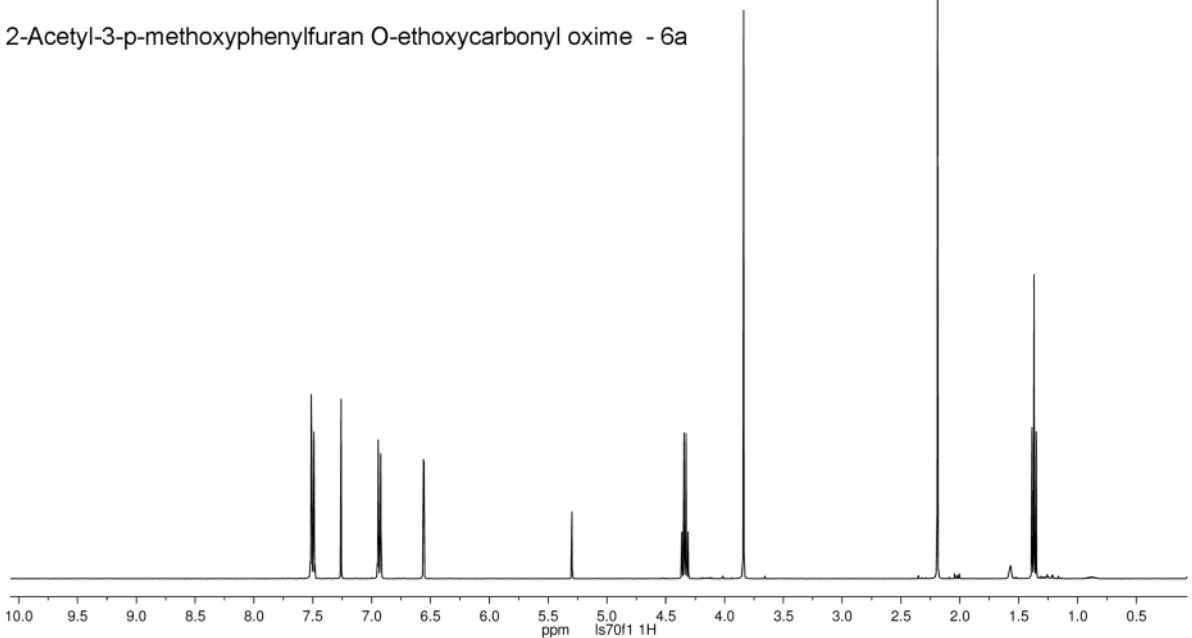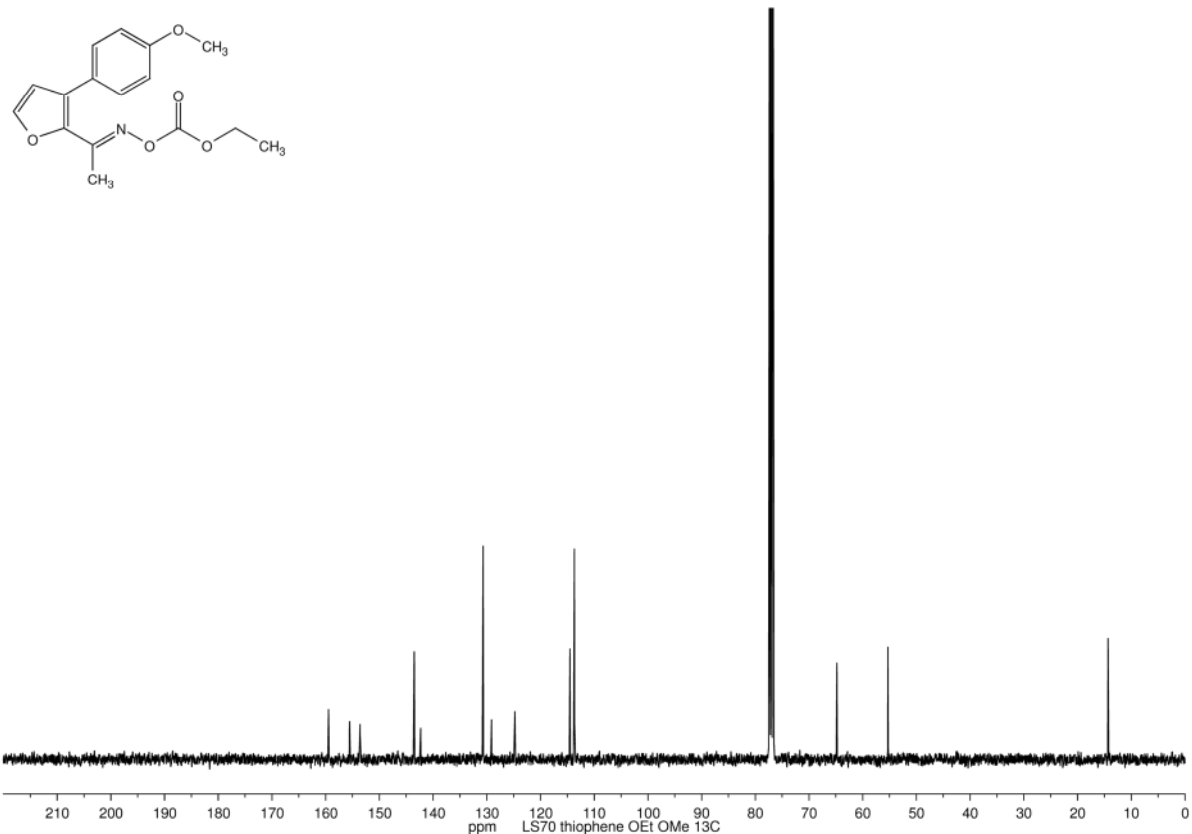

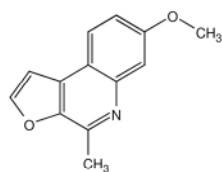

7-Methoxy-4-methylfuro[2,3-c]quinoline - 7a

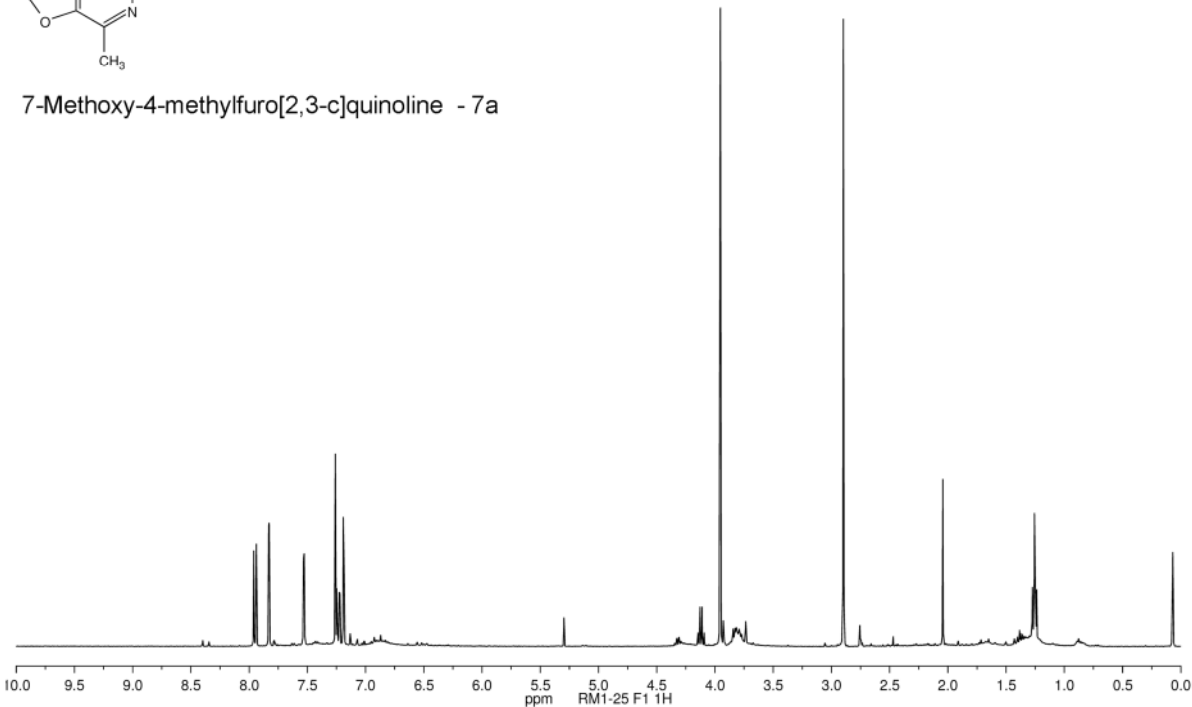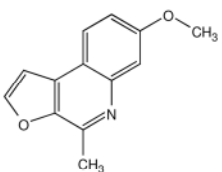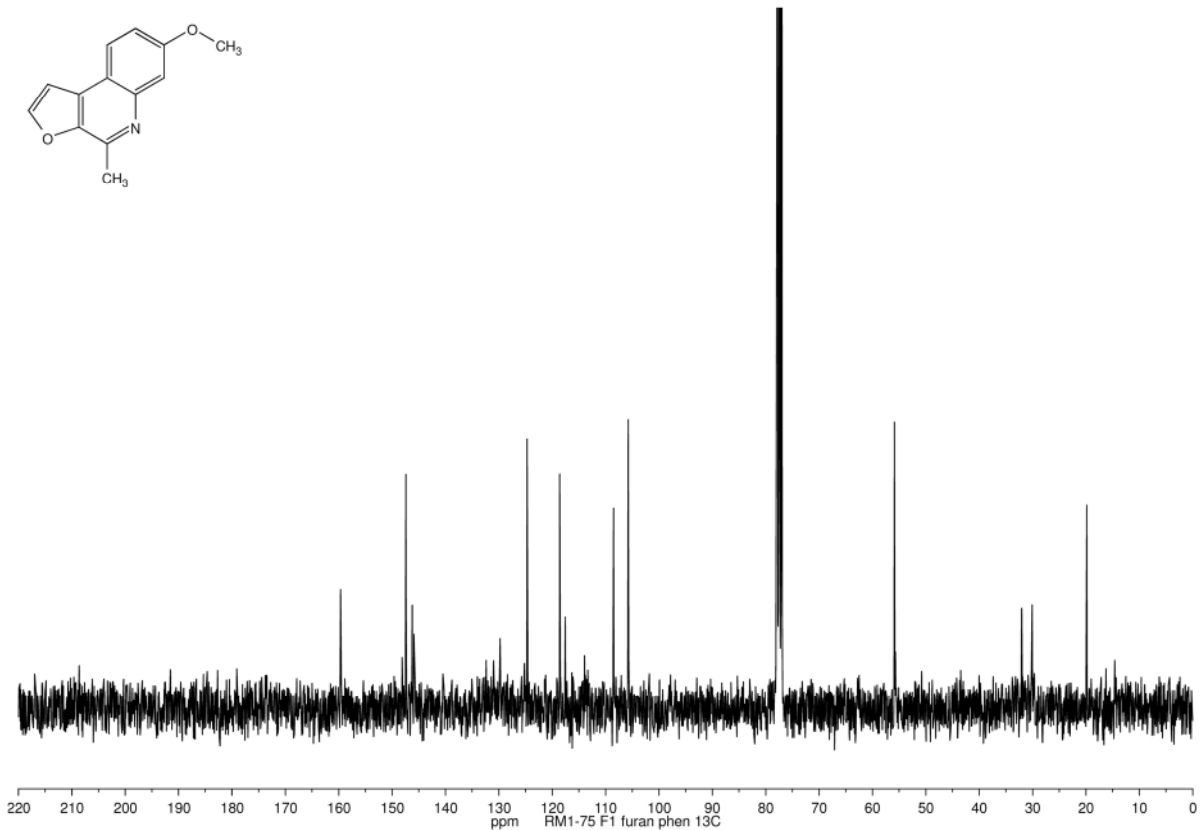



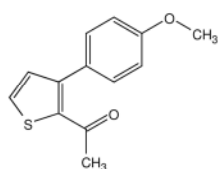

2-Acetyl-3-p-methoxyphenylthiophene

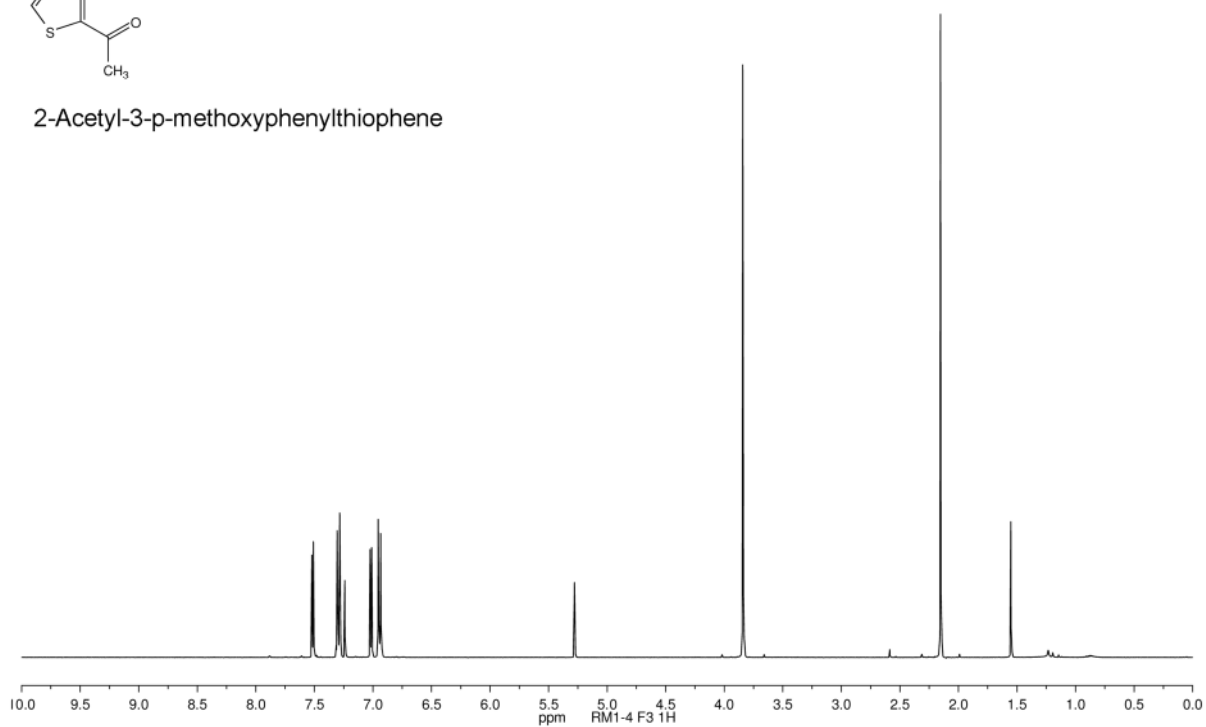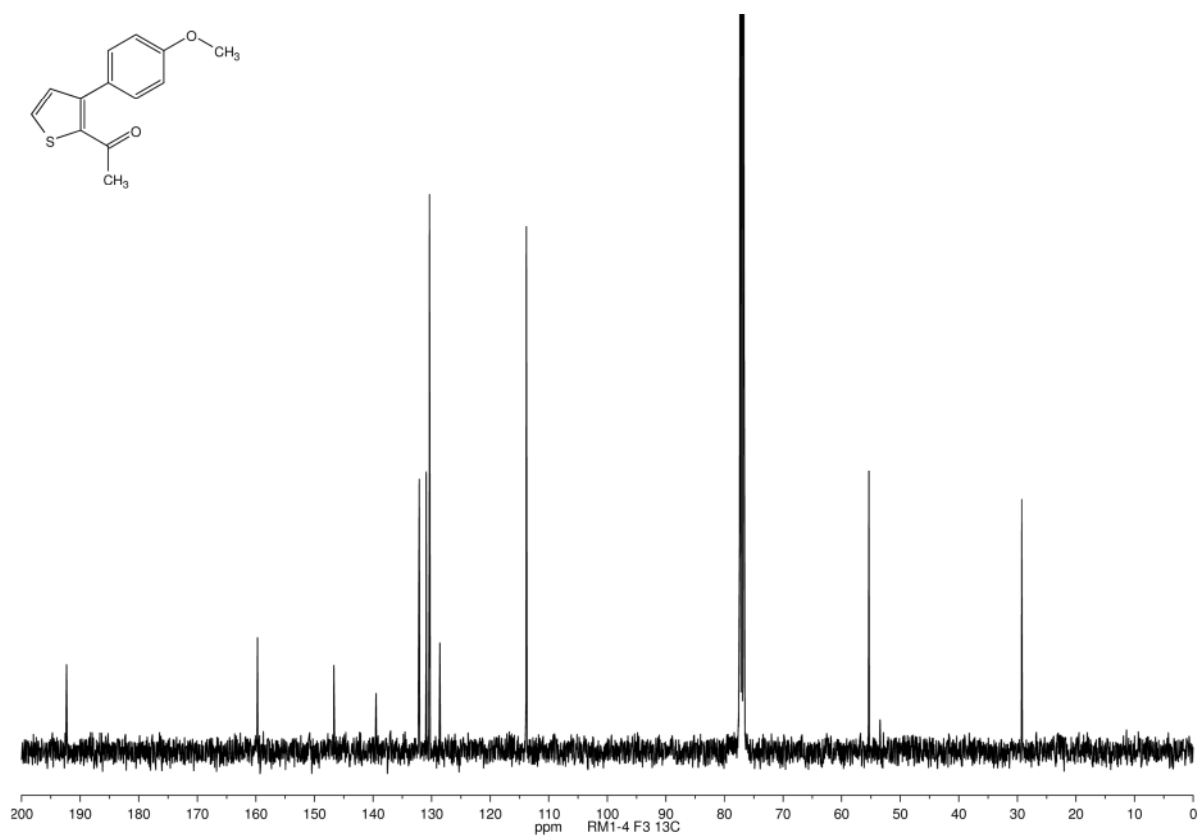

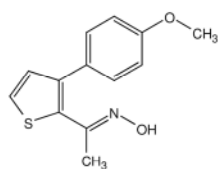

2-Acetyl-3-p-methoxyphenylthiophene oxime

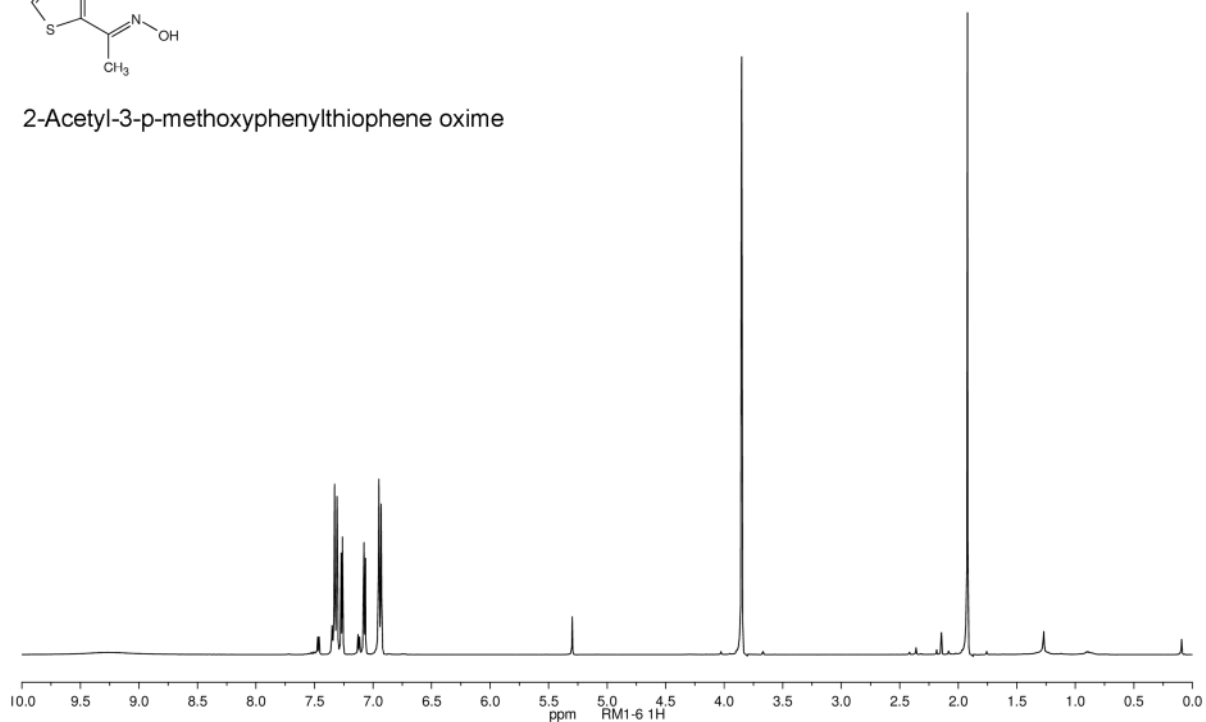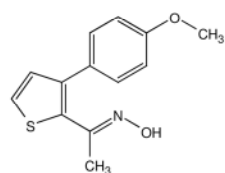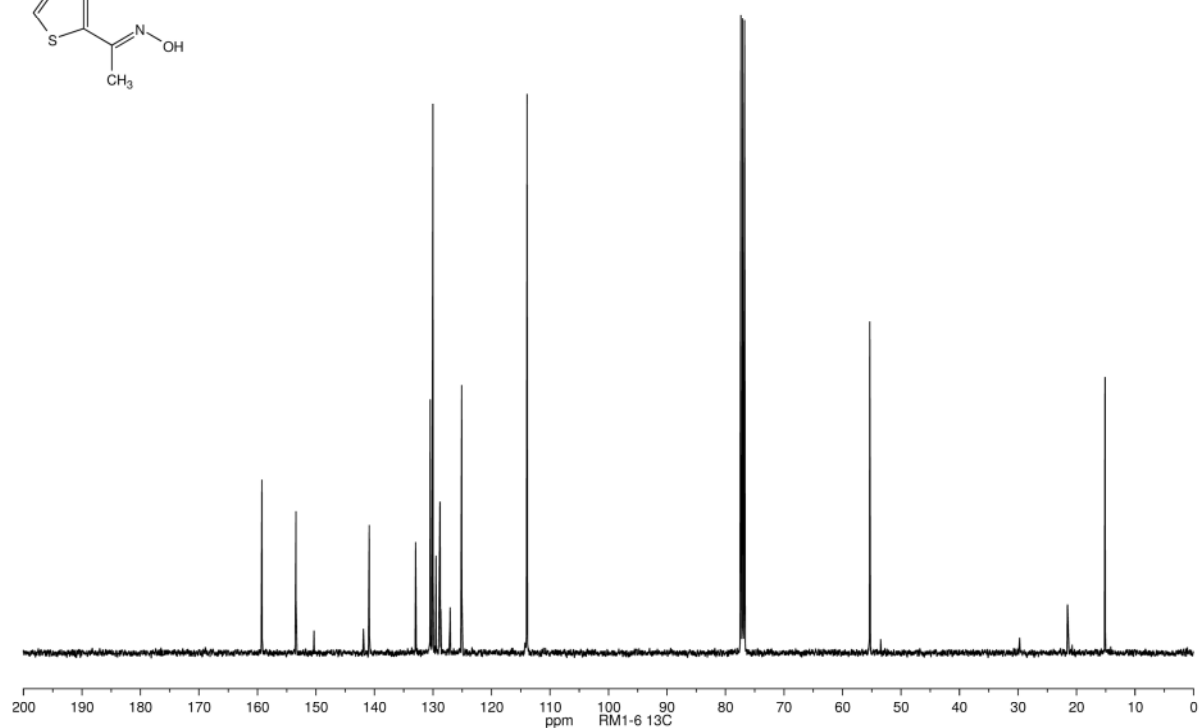

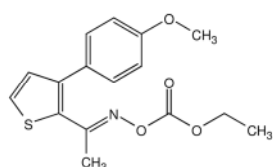

2-Acetyl-3-(4-methoxyphenyl)thiophene O-ethoxycarbonyl oxime - 6b

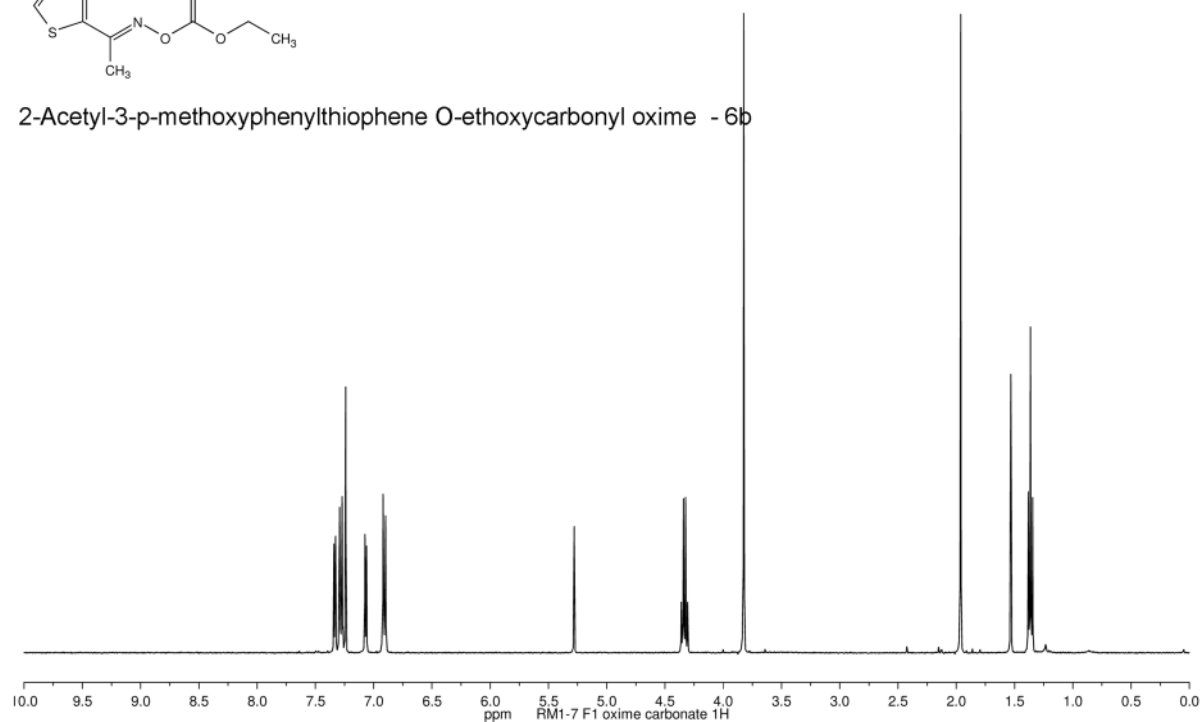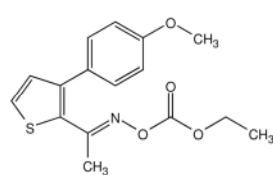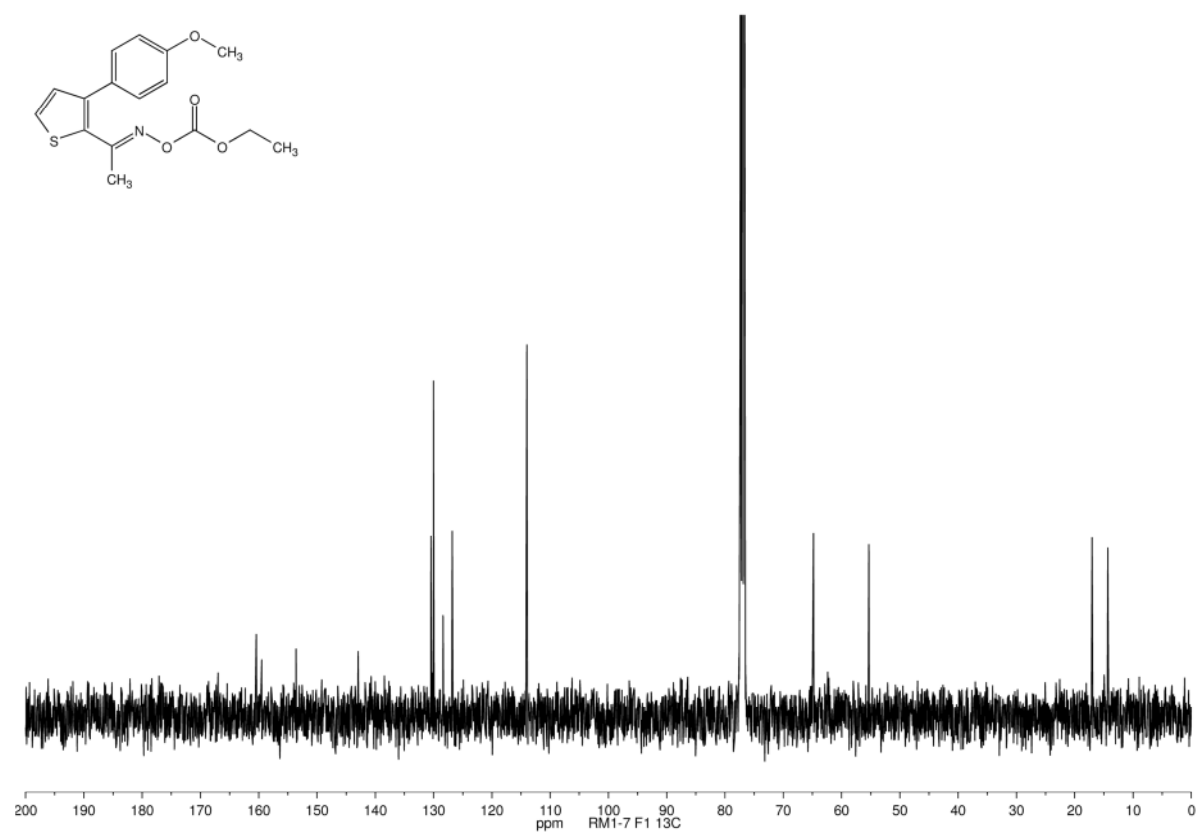

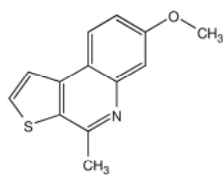

7-Methoxy-4-methylthieno[2,3-c]quinoline - 7b

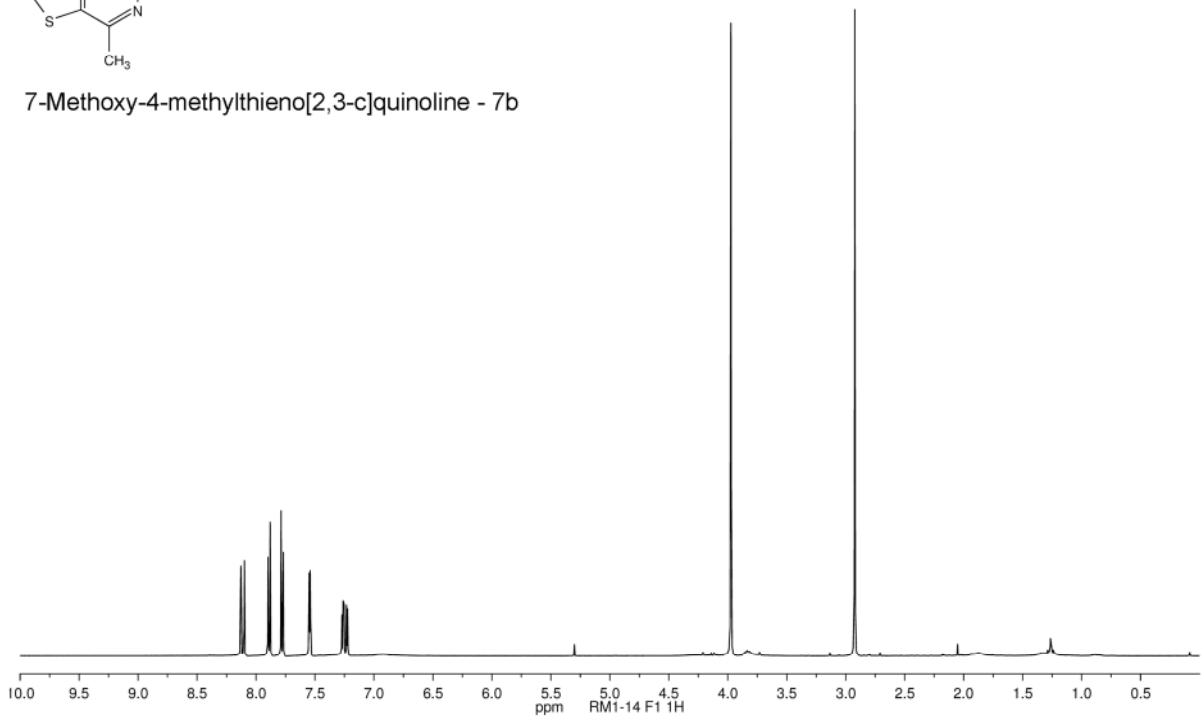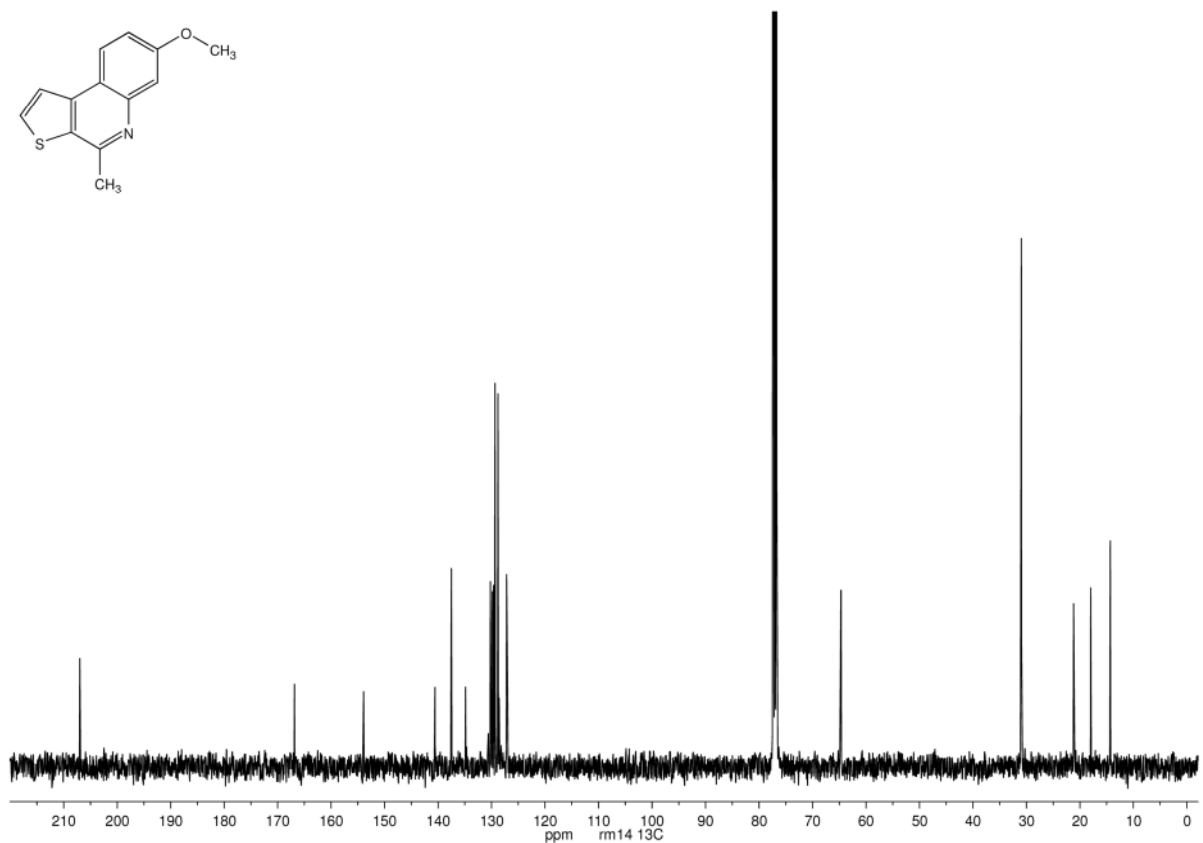

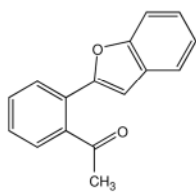

2-(Benzofuran-2-yl)acetophenone

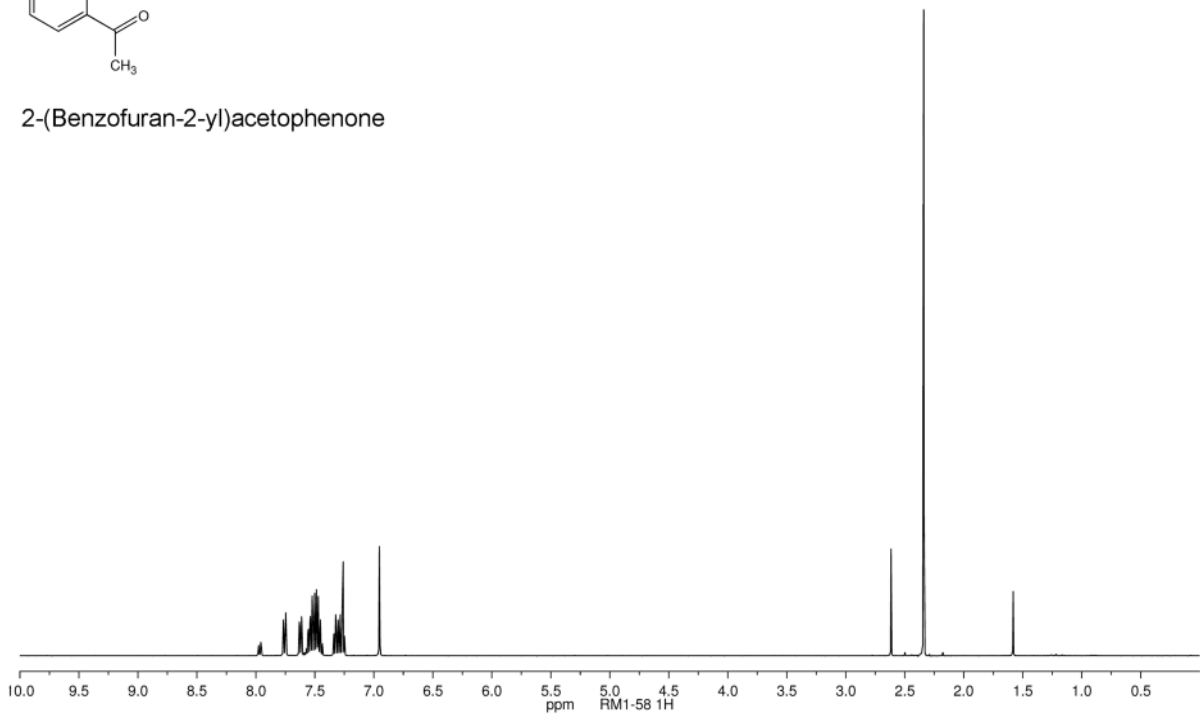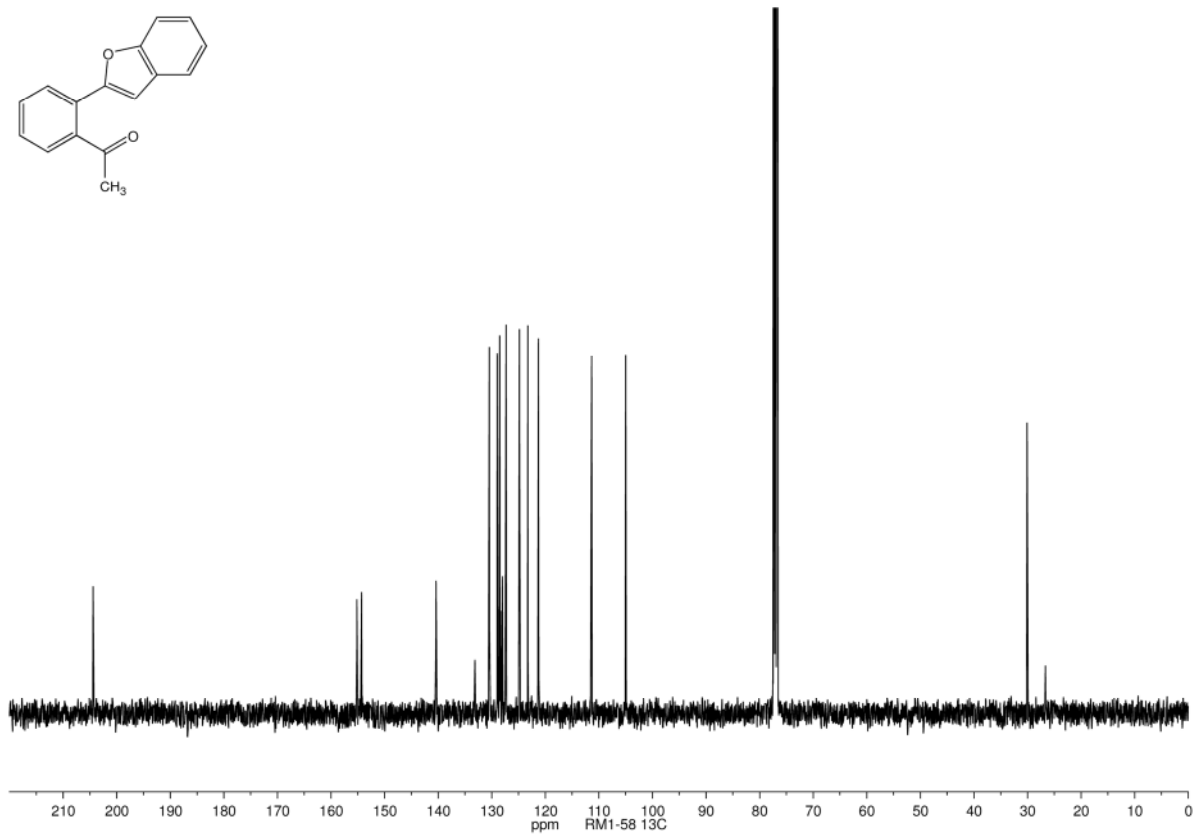

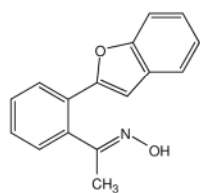

2-(Benzofuran-2-yl)acetophenone oxime

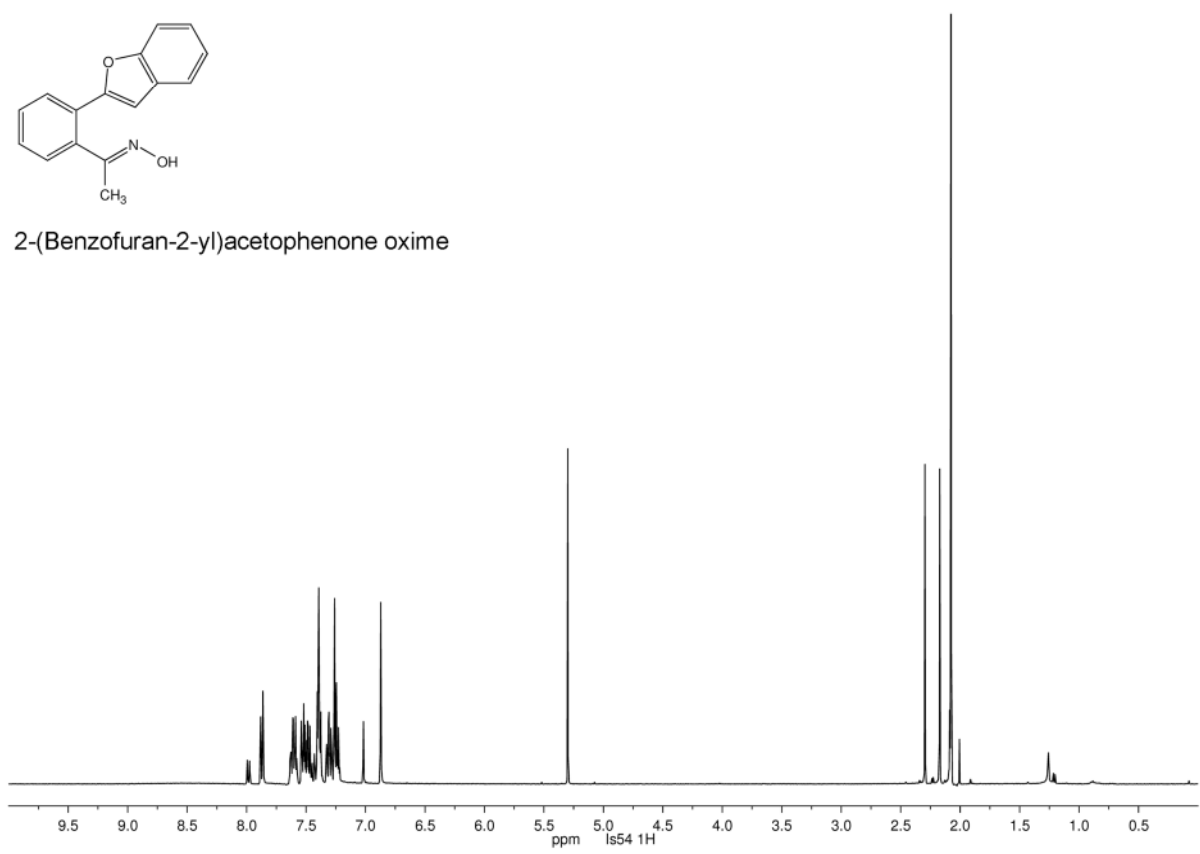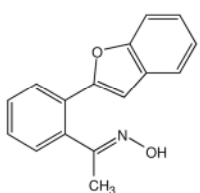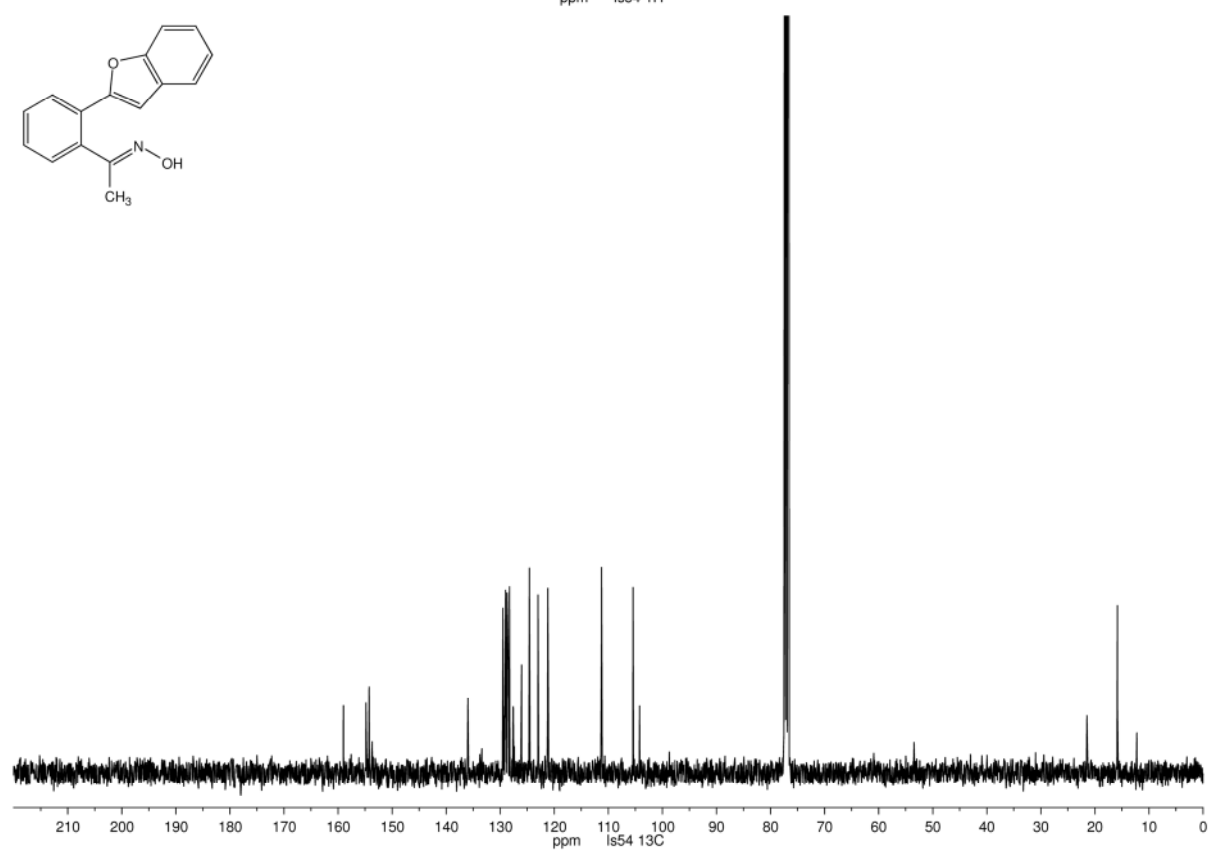

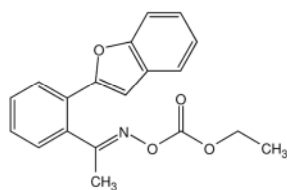

2-(Benzofuran-2-yl)acetophenone O-ethylcarbonyl oxime - 8a

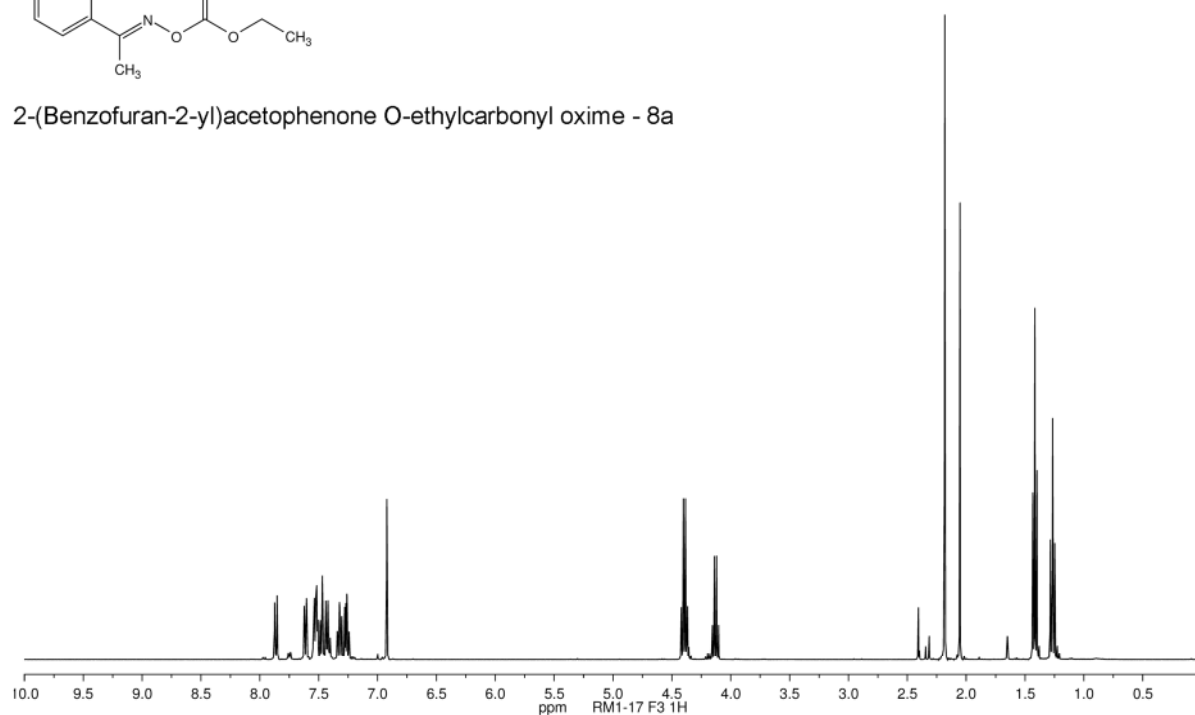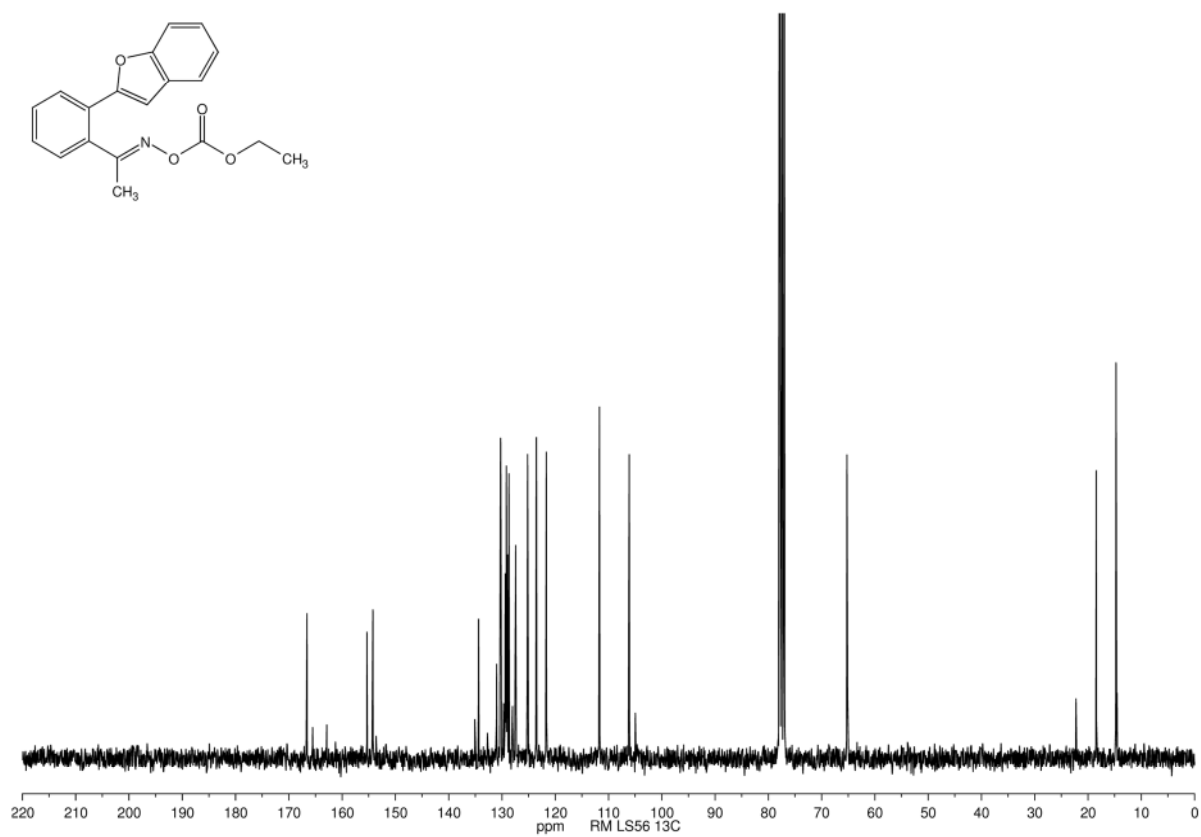

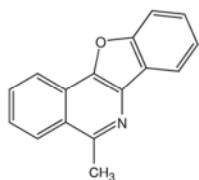

5-Methylbenzofuro[3,2-c]isoquinoline - 9a

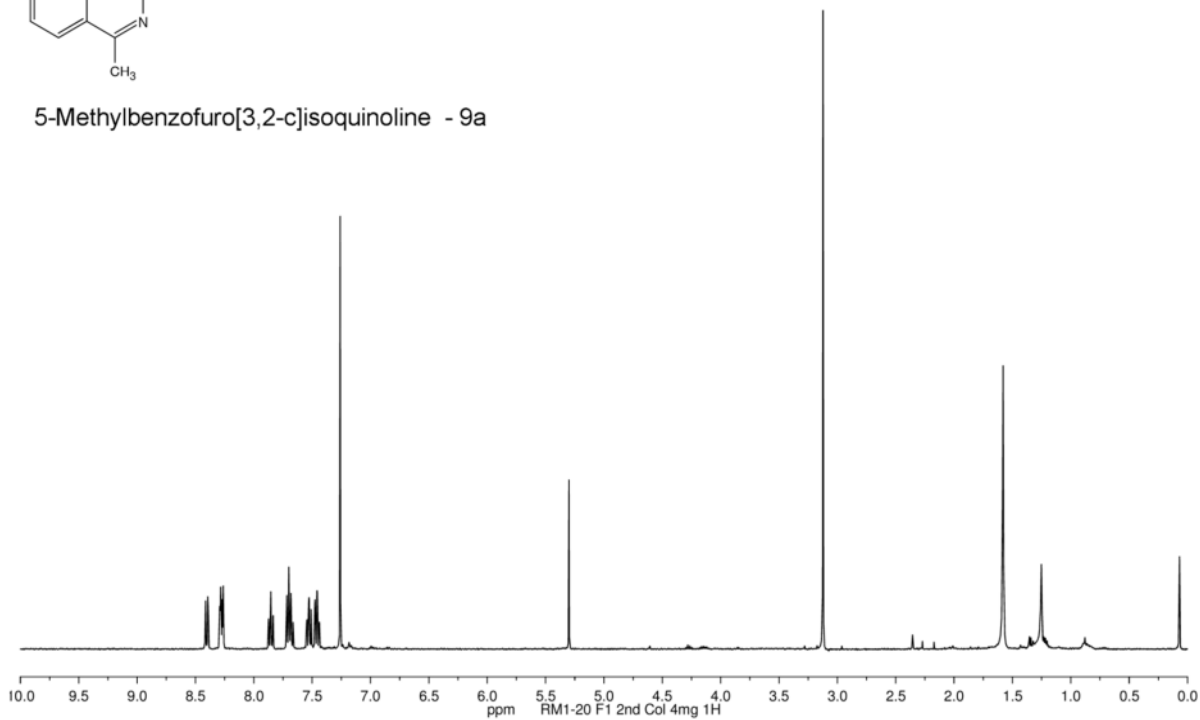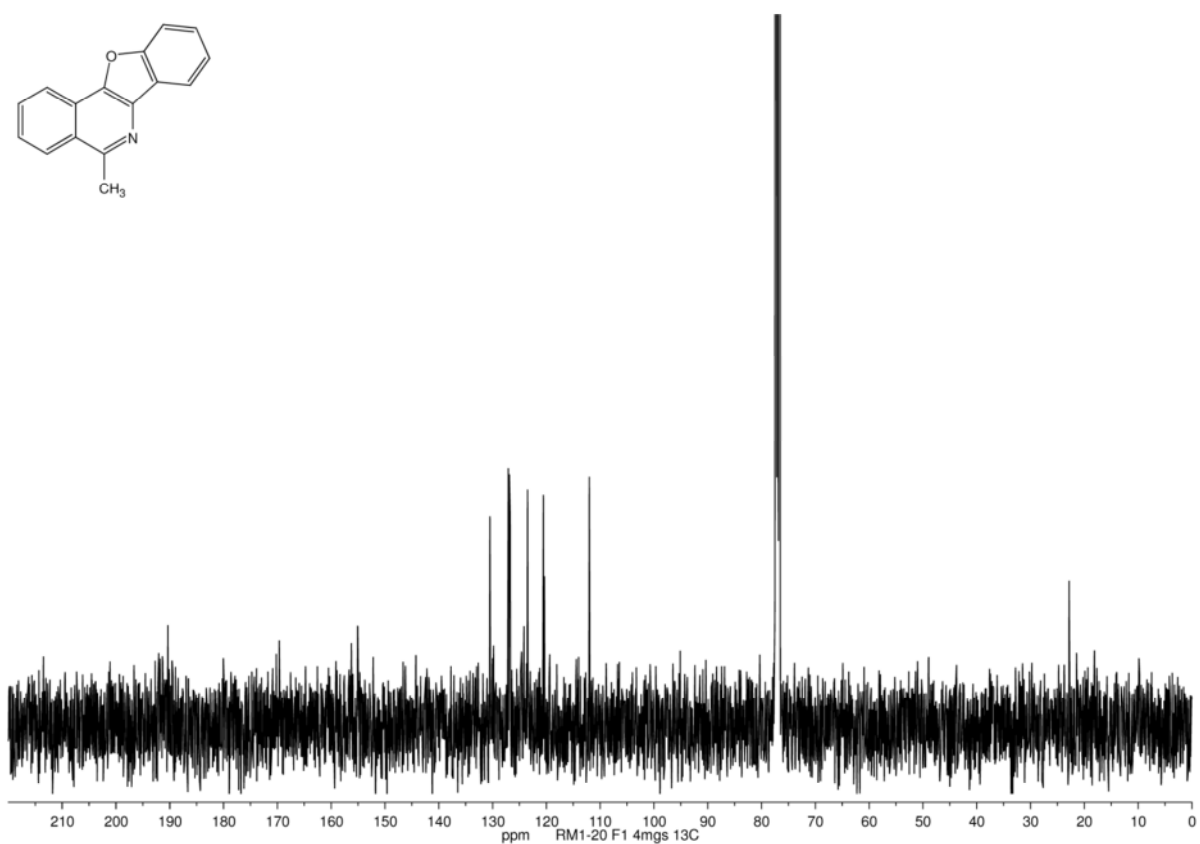



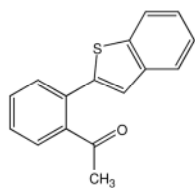

2-(Benzothiophen-2-yl)acetophenone

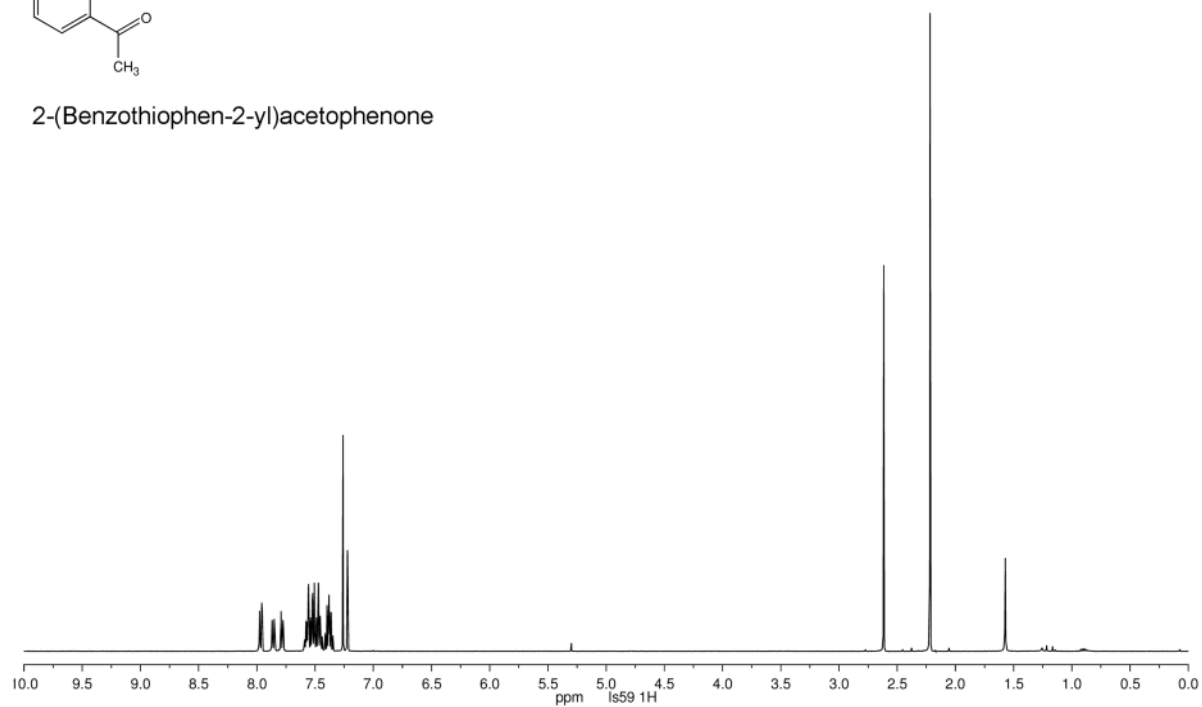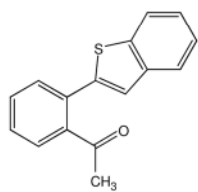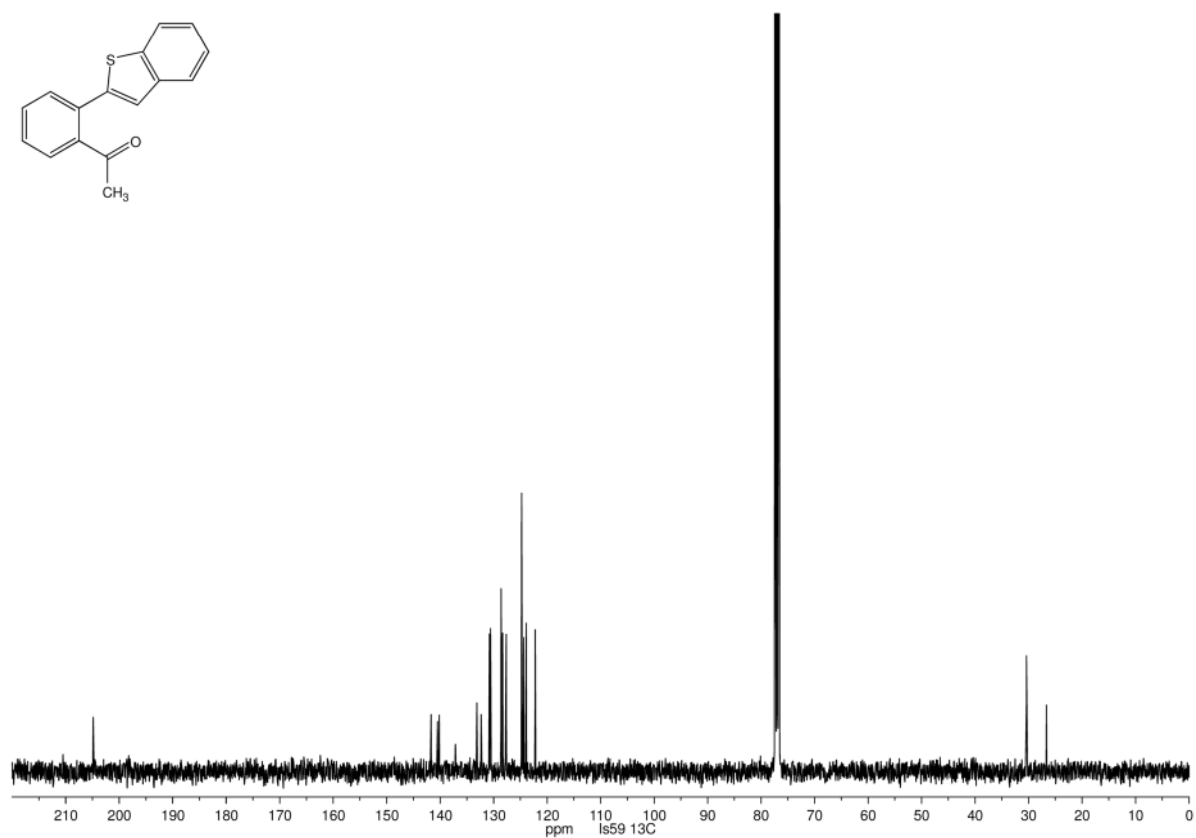

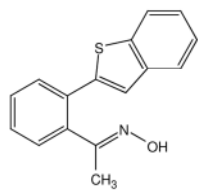

2-(Benzo[1,2-b:4,5-b']dithiophen-2-yl)acetophenone oxime

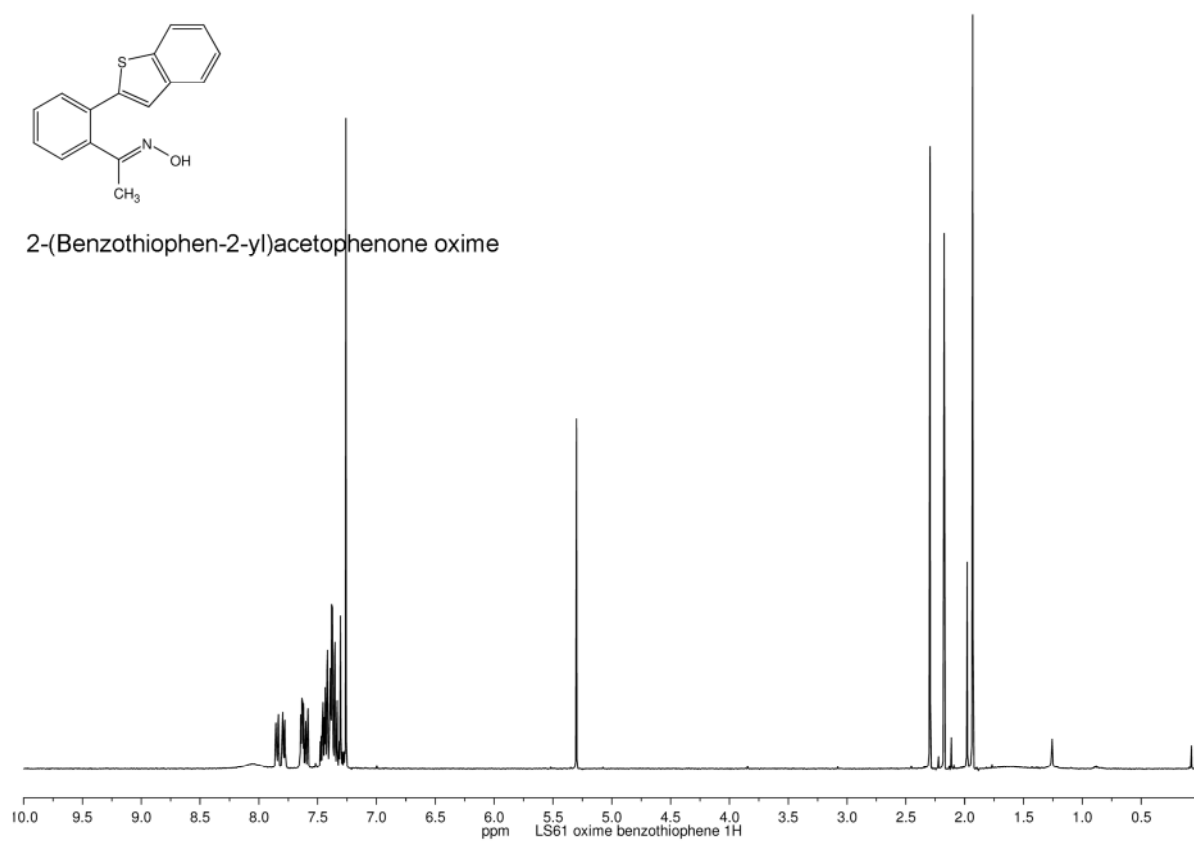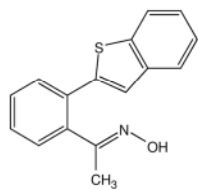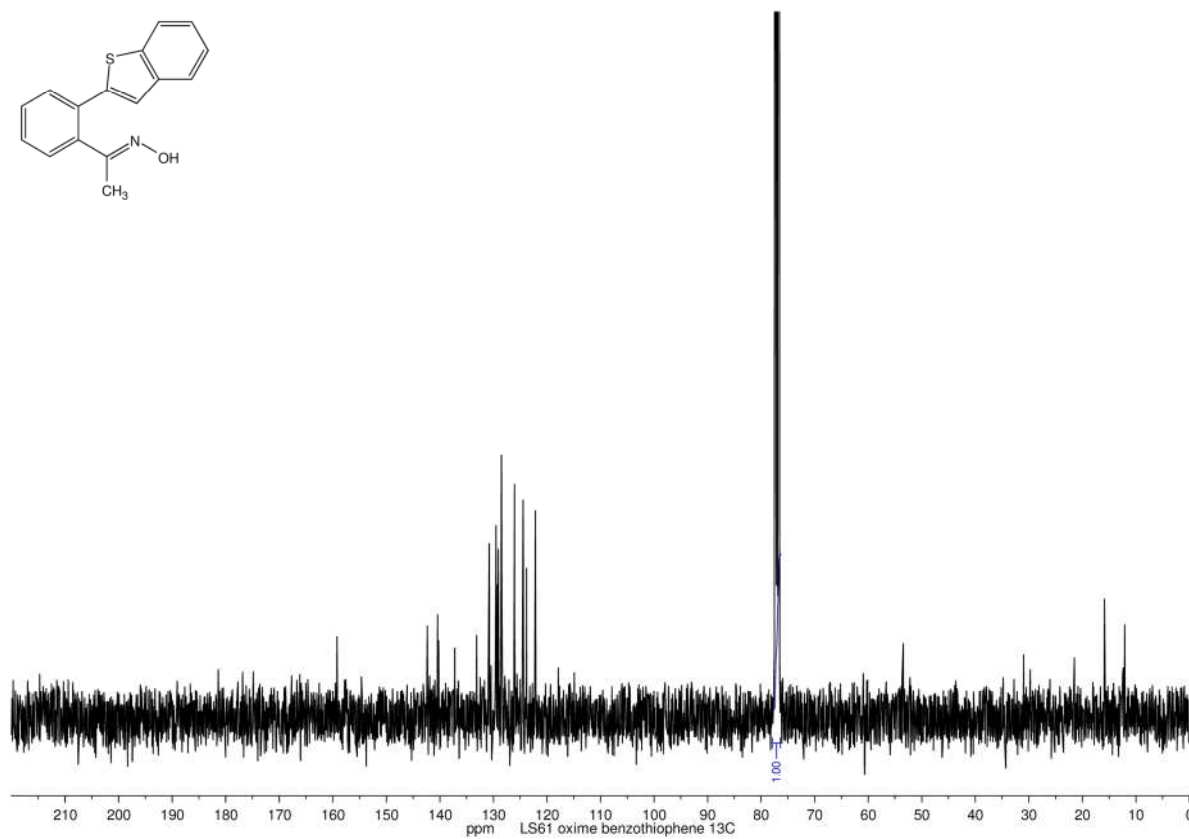

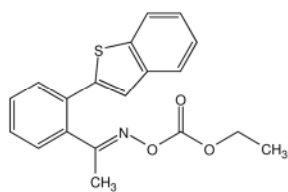

2-(Benzothiophen-2-yl)acetophenone O-ethoxycarbonyl oxime - 8b

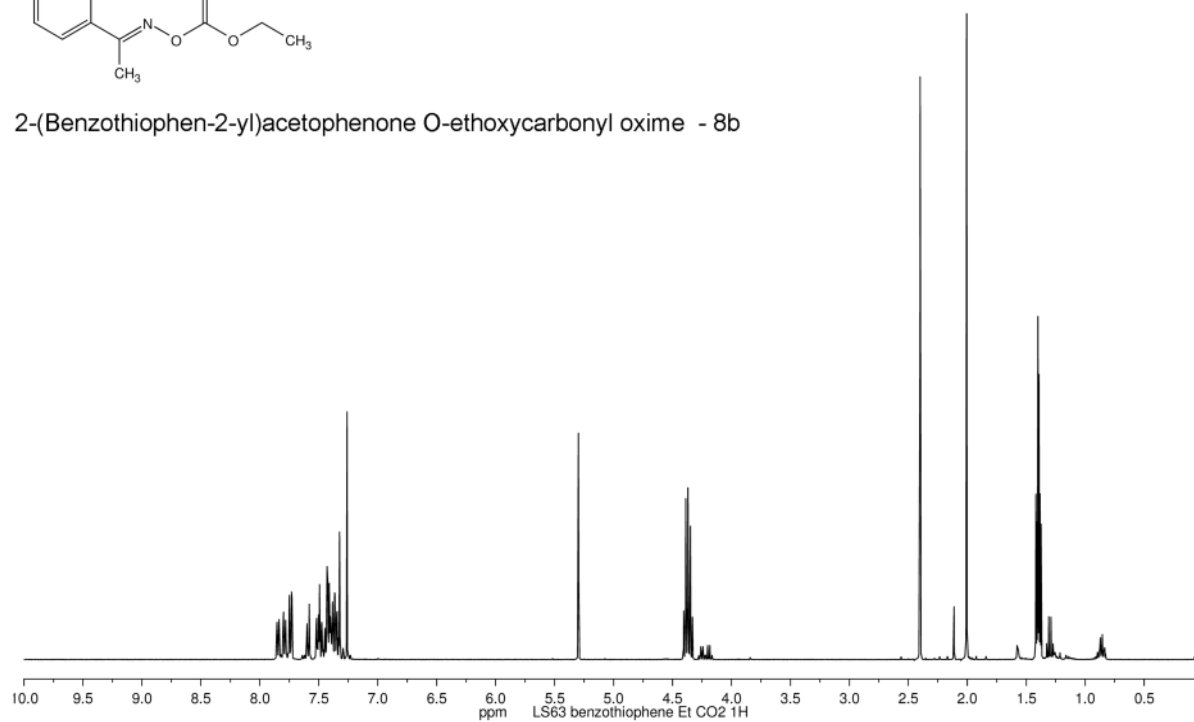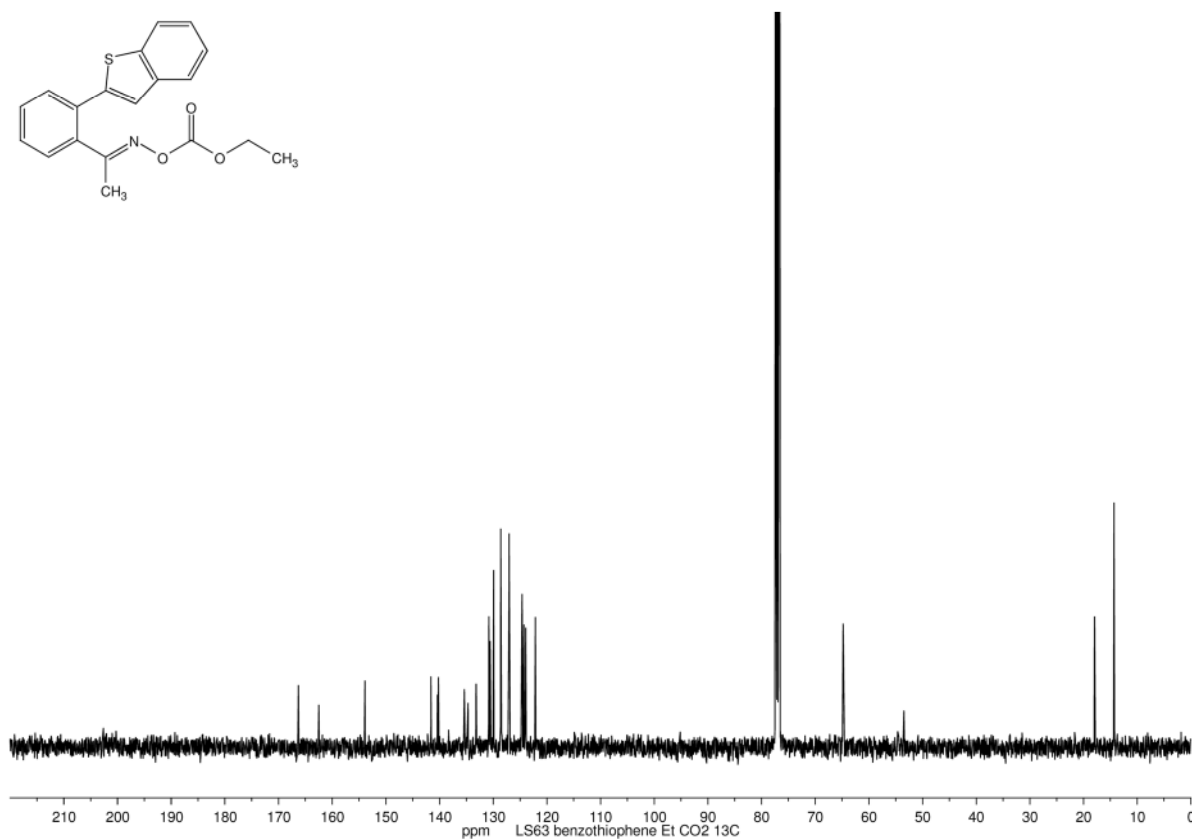

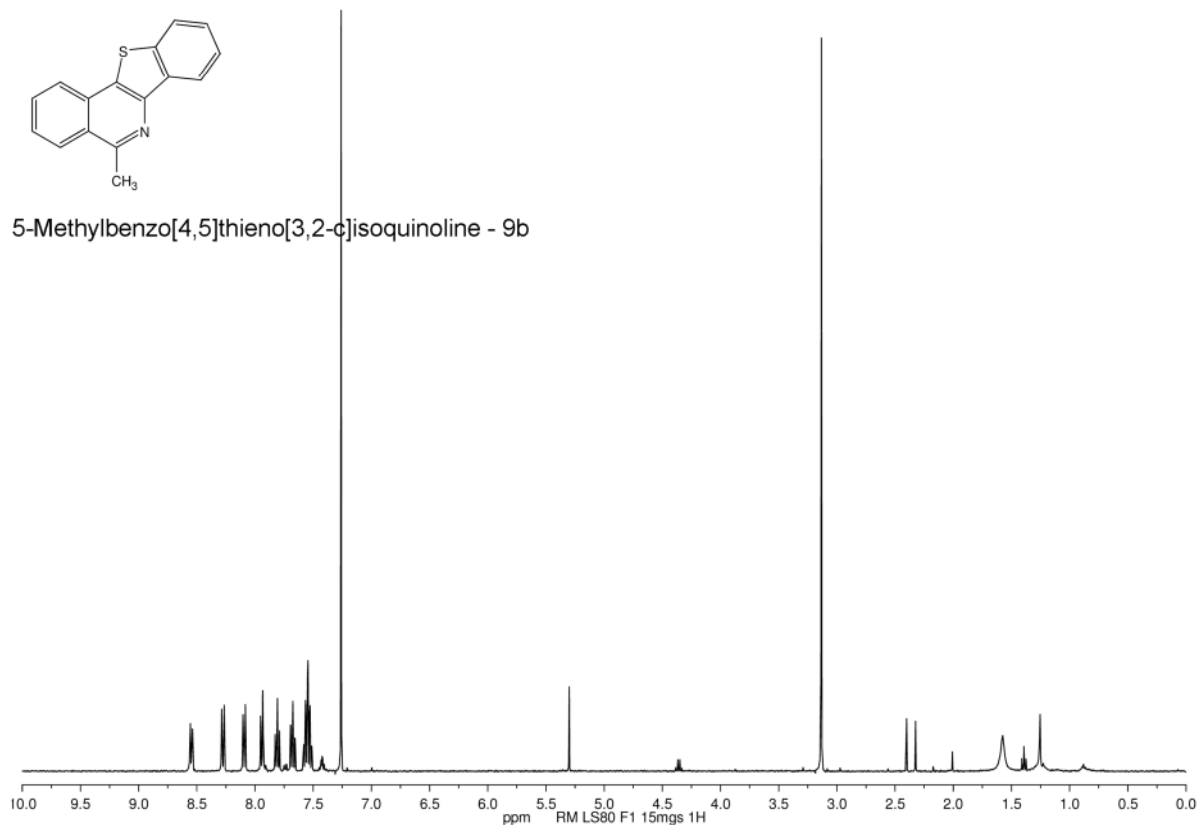

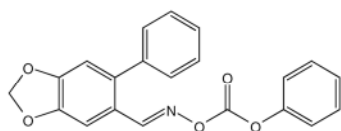

6-Phenylbenzo[d][1,3]dioxole-5-carbaldehyde O-phenoxy oxime - 10

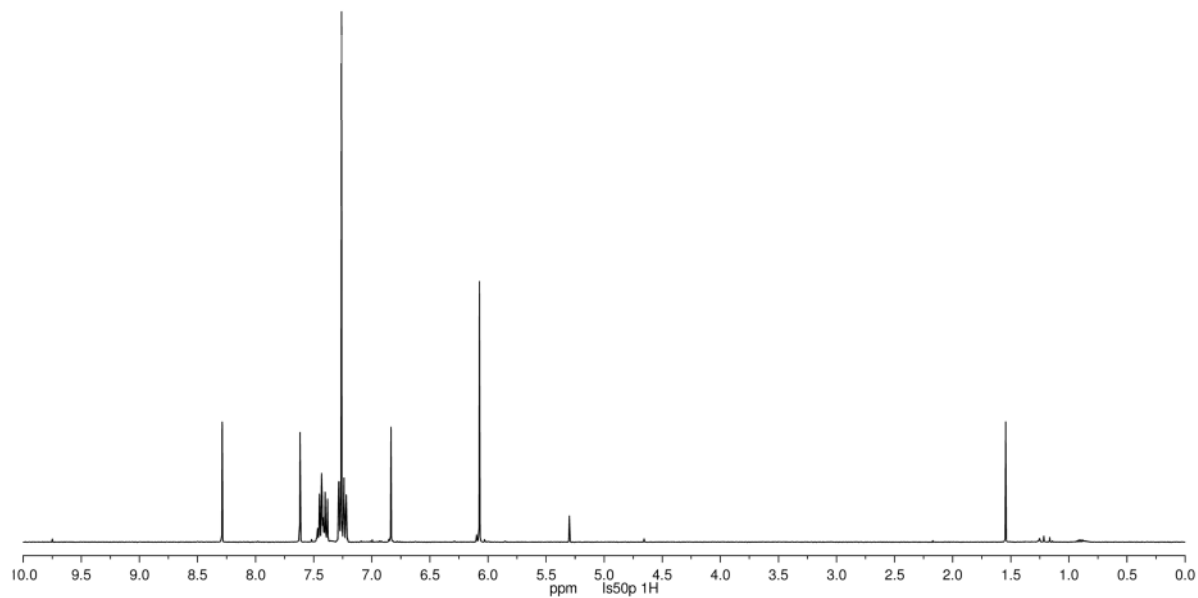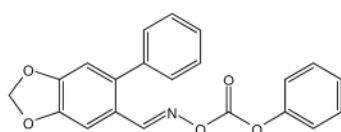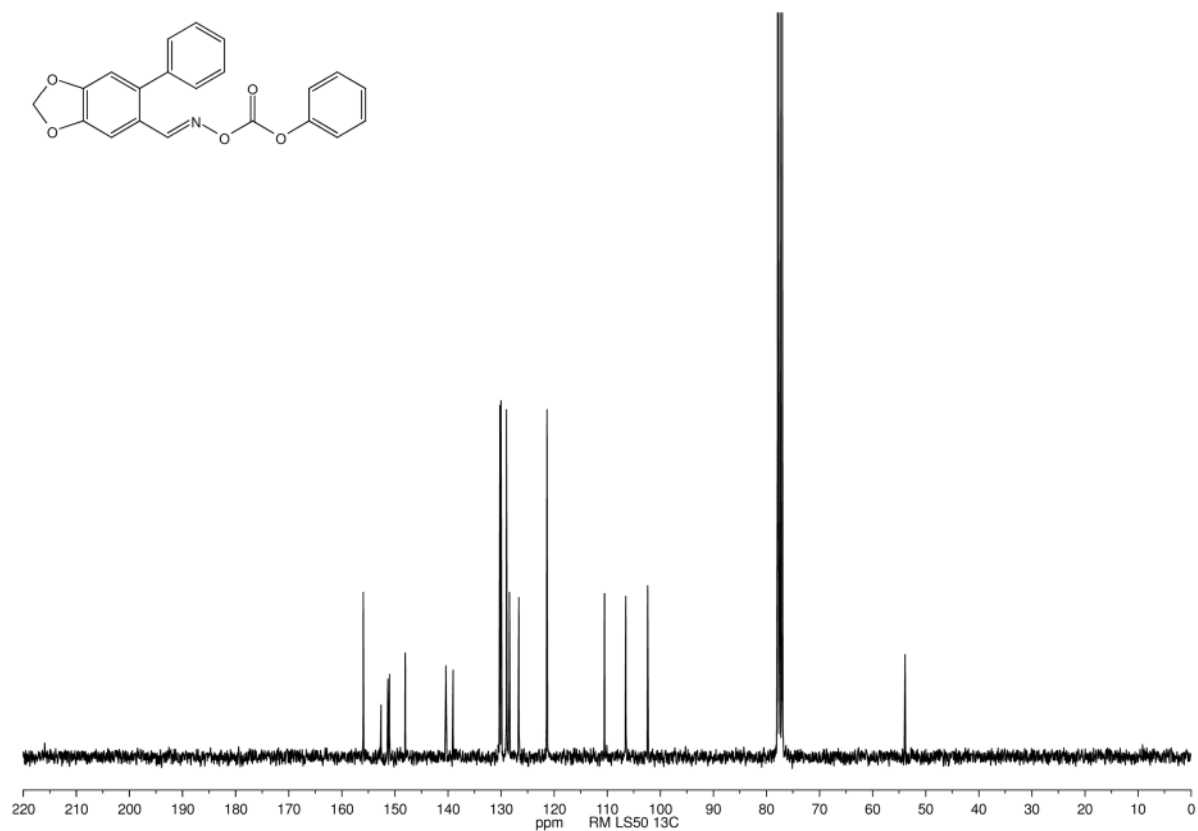

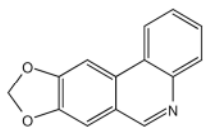

Trispheridine - 11

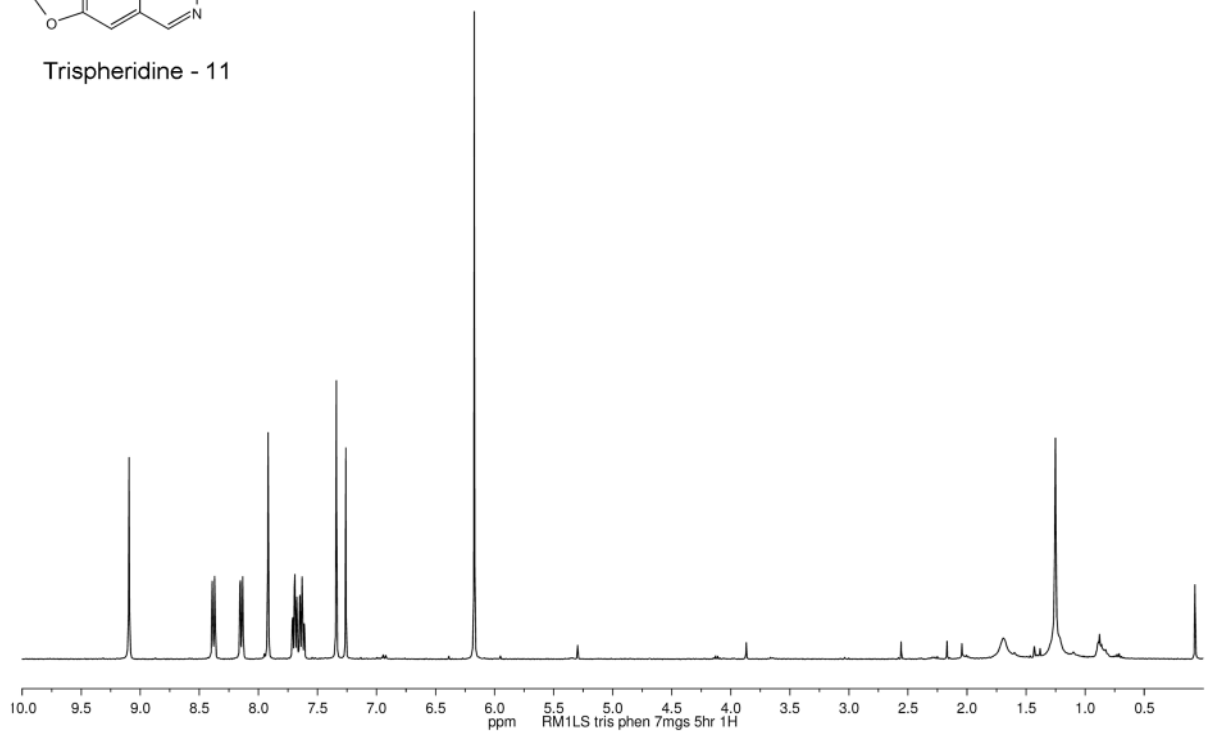

Supplement: c1cc12720a.pdf [file c1cc12720a.pdf]
